# Supplementary material for: "They called me the hyacinth girl" : T. S. Eliot, masculinity, and the Great War
Source: Royal Society of Chemistry journal article supplement (doi:10.1039/b604465b), 2001-05-02
Supplement: b604465b.pdf [file b604465b.pdf]

Wire-Like PtC≡CC≡CC≡CC≡CPt Moieties Surrounded by Double-Helical  
"Insulation": New Motifs Featuring P(CH<sub>2</sub>)<sub>20</sub>P and P(CH<sub>2</sub>)<sub>4</sub>O(CH<sub>2</sub>)<sub>2</sub>O(CH<sub>2</sub>)<sub>4</sub>P  
Linkages

**Laura de Quadras, Frank Hampel, and J. A. Gladysz\***

Institut für Organische Chemie, Friedrich-Alexander-Universität Erlangen-Nürnberg, Henkestraße  
42, 91054 Erlangen, Germany

submitted to *Chem. Commun.*

**General Data.** Reactions were conducted under N<sub>2</sub> unless noted, but workups of platinum complexes were carried out in air. Commercial chemicals were treated as follows: THF, distilled from Na/benzophenone; CH<sub>2</sub>Cl<sub>2</sub>, distilled from CaH<sub>2</sub>; acetone, distilled from K<sub>2</sub>CO<sub>3</sub>; HNEt<sub>2</sub>, distilled from KOH; hexanes, distilled; toluene, distilled; methanol, distilled; ethanol, distilled; ethyl acetate, distilled; TMEDA (Aldrich) distilled; HO(CH<sub>2</sub>)<sub>2</sub>CH=CH<sub>2</sub> (Aldrich) distilled from Na, Br(CH<sub>2</sub>)<sub>4</sub>Br (Acros) distilled; Ru(=CHPh)(PCy<sub>3</sub>)<sub>2</sub>(Cl)<sub>2</sub> (Aldrich), Ru(=CHPh)(H<sub>2</sub>IMes)(PCy<sub>3</sub>)(Cl)<sub>2</sub> (Aldrich), 10% Pd/C (Acros), CuI (Aldrich, 99.999%), ClCH<sub>2</sub>CH<sub>2</sub>Cl (98% Fluka), CuCl (Aldrich, 99.99%), Pd/C (10% Lancaster), alumina (neutral, Fluka), silica gel 60M (Macherey-Nagel), Celite<sup>®</sup>535 (Fluka), and other materials, used as received.

NMR spectra were recorded on standard 300-400 MHz spectrometers. Mass spectra were recorded on a Micromass Zabspec instrument. IR and UV-visible spectra were recorded on ASI ReactIR-1000 and Shimadzu model 3102 spectrometers. DSC and TGA data were recorded on a Mettler-Toledo DSC-821 instrument and treated by standard methods.<sup>s1</sup> Microanalyses were conducted with a Carlo Erba EA1110 instrument.

***trans*-(C<sub>6</sub>F<sub>5</sub>)(Ph<sub>2</sub>P(CH<sub>2</sub>)<sub>9</sub>CH=CH<sub>2</sub>)<sub>2</sub>PtCl (1a).**<sup>s2</sup> A Schlenk flask was charged with [Pt(μ-Cl)(C<sub>6</sub>F<sub>5</sub>)(tht)]<sub>2</sub> (3.000 g, 3.088 mmol),<sup>s3</sup> Ph<sub>2</sub>P(CH<sub>2</sub>)<sub>9</sub>CH=CH<sub>2</sub> (4.286 g, 12.68 mmol),<sup>s2</sup> and CH<sub>2</sub>Cl<sub>2</sub> (150 mL) with stirring. After 20 h, the solvent was removed by rotary evaporation and the residue chromatographed on a silica gel column (20 × 2.5 cm, 70:30 v/v hexanes/CH<sub>2</sub>Cl<sub>2</sub>). The solvent was removed from the product-containing fractions by oil pump vacuum to give **1a** as a colorless oil (6.280 g, 5.867 mmol; 95%). Calcd for C<sub>52</sub>H<sub>62</sub>ClF<sub>5</sub>P<sub>2</sub>Pt: C, 58.13; H, 5.82. Found: C, 57.84; H, 5.40.

NMR (δ, CDCl<sub>3</sub>),<sup>s4</sup> <sup>1</sup>H 7.50-7.46 (m, 8H of 4 Ph), 7.33-7.29 (m, 4H of 4 Ph), 7.25-7.22 (m, 8H of 4 Ph), 5.79 (ddt, 1H, <sup>3</sup>J<sub>HHtrans</sub> = 17.0 Hz, <sup>3</sup>J<sub>HHcis</sub> = 10.2 Hz, <sup>3</sup>J<sub>HH</sub> = 6.7 Hz, CH=CH<sub>2</sub>), 4.97 (br d, 1H, <sup>3</sup>J<sub>HHtrans</sub> = 17.0 Hz, CH=CH<sub>E</sub>H<sub>Z</sub>), 4.91 (br d, 1H, <sup>3</sup>J<sub>HHcis</sub> = 10.2 Hz, CH=CH<sub>E</sub>H<sub>Z</sub>), 2.58-2.55 (m, 4H, PCH<sub>2</sub>), 2.05-2.01 (m, 4H, CH<sub>2</sub>CH=), 1.89-1.87 (m, 4H, PCH<sub>2</sub>CH<sub>2</sub>) 1.41-1.27 (m, 24H, remaining CH<sub>2</sub>); <sup>13</sup>C{<sup>1</sup>H}<sup>s5</sup> 139.2 (s, CH=), 133.0 (virtual t, <sup>2</sup>J<sub>CP</sub> = 5.8,<sup>s6</sup> *o* to P), 130.9 (virtual t, <sup>1</sup>J<sub>CP</sub> = 27.4 Hz,<sup>s6</sup> *i* to P), 130.2 (s, *p* to P), 127.9 (virtual t, <sup>3</sup>J<sub>CP</sub> = 5.1 Hz,<sup>s6</sup> *m* to P), 114.1 (s, CH=CH<sub>2</sub>), 33.8 (s, CH<sub>2</sub>CH=), 31.4 (virtual t, <sup>3</sup>J<sub>CP</sub> = 7.5 Hz,<sup>s6</sup> PCH<sub>2</sub>CH<sub>2</sub>CH<sub>2</sub>), 29.4 (s, double intensity, 2CH<sub>2</sub>), 29.2 (s, CH<sub>2</sub>), 29.1 (s, CH<sub>2</sub>), 28.9 (s, CH<sub>2</sub>), 26.0 (virtual t, <sup>1</sup>J<sub>CP</sub> = 17.0 Hz,<sup>s6</sup>

PCH<sub>2</sub>), 25.6 (s, PCH<sub>2</sub>CH<sub>2</sub>); <sup>31</sup>P{<sup>1</sup>H} 16.5 (s, <sup>1</sup>J<sub>Ppt</sub> = 2659 Hz).<sup>s7</sup>

IR (cm<sup>-1</sup>, oil film), 3076 (vw), 2926 (m), 2853 (m), 1502 (s), 1463 (s), 1436 (m), 1104 (m), 1058 (m), 996 (w), 957 (vs), 919 (w), 803 (m), 737 (s), 691 (vs); MS,<sup>s8</sup> 1073 (M<sup>+</sup>, 5%), 1038 ([M-Cl]<sup>+</sup>, 100%), 870 ([M-Cl-C<sub>6</sub>F<sub>5</sub>]<sup>+</sup>, 30%).

**trans-(C<sub>6</sub>F<sub>5</sub>)(Ph<sub>2</sub>P(CH<sub>2</sub>)<sub>9</sub>CH=CH<sub>2</sub>)<sub>2</sub>Pt(C≡C)<sub>2</sub>H (2a).** A Schlenk flask was charged with **1a** (0.770 g, 0.717 mmol), CuI (0.027 g, 0.014 mmol), and HNEt<sub>2</sub> (46 mL) with stirring, and cooled to -45 °C. Then H(C≡C)<sub>2</sub>H (4 mL, 19.6 mmol, ≈ 4.9 M in THF)<sup>s9</sup> was added, and the mixture turned light yellow. The cold bath was allowed to warm to 10 °C over the course of 3 h, and was then removed. After an additional 2.5 h (orange supernatant/white precipitate), the solvent was removed by oil pump vacuum. The tan residue was extracted with toluene (3 × 3 mL). The combined extracts were filtered through an alumina column (4 × 2.5 cm), which was eluted with toluene. The solvent was removed from the filtrate/washings by oil pump vacuum to give **2a** as a yellow oil (0.667 g, 0.613 mmol; 80%). Calcd for C<sub>56</sub>H<sub>63</sub>F<sub>5</sub>P<sub>2</sub>Pt: C, 61.81; H, 5.84. Found: C, 61.66; H, 5.99.

NMR (δ, CDCl<sub>3</sub>),<sup>s4</sup> <sup>1</sup>H 7.50-7.46 (m, 8H of 4 Ph), 7.33-7.20 (m, 12H of 4 Ph), 5.79 (ddt, 2H, <sup>3</sup>J<sub>HHtrans</sub> = 16.8 Hz, <sup>3</sup>J<sub>HHcis</sub> = 10.2 Hz, <sup>3</sup>J<sub>HH</sub> = 6.6 Hz, CH=CH<sub>2</sub>), 4.98 (br d, 2H, <sup>3</sup>J<sub>HHtrans</sub> = 16.8 Hz, CH<sub>E</sub>H<sub>Z</sub>), 4.90 (br d, 2H, <sup>3</sup>J<sub>HHcis</sub> = 10.2 Hz, CH<sub>E</sub>H<sub>Z</sub>) 2.60-2.54 (m, 4H, PCH<sub>2</sub>), 2.02-1.98 (m, 4H, CH<sub>2</sub>CH=), 1.78 (m, 4H, PCH<sub>2</sub>CH<sub>2</sub>), 1.63 (s, 1H, C≡CH), 1.36-1.26 (m, 24H, remaining CH<sub>2</sub>); <sup>13</sup>C{<sup>1</sup>H} 145.9 (dm, <sup>1</sup>J<sub>CF</sub> = 225 Hz *o* to Pt), 139.2 (s, CH=CH<sub>2</sub>), 136.3 (m, <sup>1</sup>J<sub>CF</sub> = 247 Hz, *m/p* to Pt), 133.0 (virtual t, <sup>2</sup>J<sub>CP</sub> = 5.9 Hz,<sup>s6</sup> *o* to P), 131.6 (virtual t, <sup>1</sup>J<sub>CP</sub> = 27.8 Hz,<sup>s6</sup> *i* to P), 130.2 (s, *p* to P), 127.9 (virtual t, <sup>3</sup>J<sub>CP</sub> = 5.1 Hz,<sup>s6</sup> *m* to P), 114.1 (s, CH=CH<sub>2</sub>), 97.1 (br s, PtC≡C), 92.3 (s, PtC≡C), 72.3 (s, C≡CH), 59.7 (s, C≡CH), 33.8 (s, CH<sub>2</sub>CH=), 31.2 (virtual t, <sup>3</sup>J<sub>CP</sub> = 7.6 Hz,<sup>s6</sup> PCH<sub>2</sub>CH<sub>2</sub>CH<sub>2</sub>), 29.43 (s, CH<sub>2</sub>), 29.41 (s, CH<sub>2</sub>), 29.1 (s, CH<sub>2</sub>), 28.9 (s, CH<sub>2</sub>), 28.2 (virtual t, <sup>1</sup>J<sub>CP</sub> = 18.0 Hz,<sup>s6</sup> PCH<sub>2</sub>), 25.5 (virtual t, <sup>2</sup>J<sub>CP</sub> = 13.0 Hz, PCH<sub>2</sub>CH<sub>2</sub>); <sup>31</sup>P{<sup>1</sup>H} 14.1 (s, <sup>1</sup>J<sub>Ppt</sub> = 2571 Hz).<sup>s7</sup>

IR (cm<sup>-1</sup>, oil film), ν<sub>=CH</sub> 3311 (w), ν<sub>C≡C</sub> 2151 (m); MS,<sup>s8</sup> 1090 (M<sup>+</sup>, 60%), 1039 ([M-C<sub>4</sub>H]<sup>+</sup>, 100%), 869 ([M-C<sub>4</sub>H-C<sub>6</sub>F<sub>5</sub>]<sup>+</sup>, 40%).

**trans,trans-(C<sub>6</sub>F<sub>5</sub>)(Ph<sub>2</sub>P(CH<sub>2</sub>)<sub>9</sub>CH=CH<sub>2</sub>)<sub>2</sub>Pt(C≡C)<sub>4</sub>Pt(Ph<sub>2</sub>P(CH<sub>2</sub>)<sub>9</sub>CH=CH<sub>2</sub>)<sub>2</sub>(C<sub>6</sub>F<sub>5</sub>) (3a).** A two necked flask was charged with **2a** (0.350 g, 0.322 mmol), and acetone (15 mL), and fitted with a gas inlet needle and a condenser with circulating -18 °C ethanol. A Schlenk flask was

charged with CuCl (0.050 g, 0.51 mmol), and acetone (15 mL), and TMEDA (0.100 mL, 0.60 mmol) was added with stirring. After 0.5 h, stirring was halted (blue supernatant/yellow-green solid). Then O<sub>2</sub> was bubbled through the two necked flask with stirring and the solution was heated to 65 °C. The blue supernatant was added in portions over 2 h. After 2.5 h, the solvent was removed by rotary evaporation and oil pump vacuum. Toluene was added and the mixture was transferred to an alumina column (4 × 2.5 cm). The column was eluted with toluene until UV monitoring (fluorescence of spotted TLC plate) showed no absorbing material (ca. 40 mL). The solvent was removed by rotary evaporation. The residue was chromatographed on a silica gel column (20 × 2 cm, 70:30 v/v hexanes/CH<sub>2</sub>Cl<sub>2</sub>). The solvent was removed from the product-containing fractions by oil pump vacuum to give **3a** as a yellow oil (0.271 g, 0.125 mmol; 77%). Calcd for C<sub>112</sub>H<sub>124</sub>F<sub>10</sub>P<sub>4</sub>Pt<sub>2</sub>: C, 61.87; H, 5.74. Found: C, 61.61; H, 5.74.

NMR (δ, CDCl<sub>3</sub>),<sup>s4</sup> <sup>1</sup>H 7.48-7.43 (m, 16H of 8 Ph), 7.32-7.30 (m, 8H of 8 Ph), 7.27-7.23 (m, 16H of 8 Ph), 5.81 (ddt, 4H, <sup>3</sup>J<sub>HHtrans</sub> = 17.0 Hz, <sup>3</sup>J<sub>HHcis</sub> 10.2 Hz, <sup>3</sup>J<sub>HH</sub> = 6.7 Hz, CH=CH<sub>2</sub>), 4.99 (br d, 2H, <sup>3</sup>J<sub>HHtrans</sub> = 17.1 Hz, CH=CH<sub>E</sub>H<sub>Z</sub>), 4.92 (br d, 2H, <sup>3</sup>J<sub>HHcis</sub> = 10.2 Hz, CH=CH<sub>E</sub>H<sub>Z</sub>), 2.63-2.50 (m, 8H, PCH<sub>2</sub>), 2.05-2.00 (m, 8H, CH<sub>2</sub>CH=), 1.73-1.72 (m, 8H, PCH<sub>2</sub>CH<sub>2</sub>), 1.36-1.27 (m, 48H, remaining CH<sub>2</sub>); <sup>13</sup>C{<sup>1</sup>H} 146.0 (dm, <sup>1</sup>J<sub>CF</sub> = 226 Hz, *o* to Pt), 139.2 (s, CH=CH<sub>2</sub>), 136.6 (m, <sup>1</sup>J<sub>CF</sub> = 241 Hz, *m/p* to Pt), 133.0 (virtual t, <sup>2</sup>J<sub>CP</sub> = 5.7 Hz,<sup>s6</sup> *o* to P), 131.2 (virtual t, <sup>1</sup>J<sub>CP</sub> = 27.9 Hz,<sup>s6</sup> *i* to P), 130.2 (s, *p* to P), 127.9 (virtual t, <sup>3</sup>J<sub>CP</sub> = 5.0 Hz,<sup>s6</sup> *m* to P), 114.1 (s, CH=CH<sub>2</sub>), 100.2 (br s, PtC≡C), 94.1 (s, PtC≡C), 63.7 (s, PtC≡CC), 57.9 (s, PtC≡CC≡C), 33.8 (s, CH<sub>2</sub>CH=), 31.3 (virtual t, <sup>3</sup>J<sub>CP</sub> = 7.6 Hz,<sup>s6</sup> PCH<sub>2</sub>CH<sub>2</sub>CH<sub>2</sub>), 29.42 (s, CH<sub>2</sub>), 29.35 (s, CH<sub>2</sub>), 29.14 (s, CH<sub>2</sub>), 29.07 (s, CH<sub>2</sub>), 28.90 (s, CH<sub>2</sub>), 28.12 (virtual t, <sup>1</sup>J<sub>CP</sub> = 18.0 Hz,<sup>s6</sup> PCH<sub>2</sub>), 25.4 (br s, PCH<sub>2</sub>CH<sub>2</sub>CH<sub>2</sub>); <sup>31</sup>P{<sup>1</sup>H} 14.1 (s, <sup>1</sup>J<sub>PtP</sub> = 2564 Hz).<sup>s7</sup>

IR (cm<sup>-1</sup>, oil film), ν<sub>C≡C</sub> 2146 (m), 2003 (w); UV-vis (1.25 × 10<sup>-5</sup> M, CH<sub>2</sub>Cl<sub>2</sub>) nm (ε, M<sup>-1</sup>cm<sup>-1</sup>), 261 (67000), 292 (73000), 320 (91000), 353 (8000), 379 (3800), 411 (1700); MS,<sup>s8</sup> 2174 (M<sup>+</sup>, 20%), 1039 [(C<sub>6</sub>F<sub>5</sub>)<sub>2</sub>P(CH<sub>2</sub>)<sub>9</sub>CH=CH<sub>2</sub>)<sub>2</sub>Pt]<sup>+</sup>, 40%), 869 [(Ph<sub>2</sub>P(CH<sub>2</sub>)<sub>9</sub>CH=CH<sub>2</sub>)<sub>2</sub>Pt]<sup>+</sup>, 100%).

**Alkene Metathesis of 3a.** A two necked Schlenk flask was charged with Ru(=CHPh)-(PCy<sub>3</sub>)<sub>2</sub>(Cl)<sub>2</sub> (ca. half of 0.009 g, 0.0098 mmol), CH<sub>2</sub>Cl<sub>2</sub> (250 mL), and **3a** (0.327 g, 0.150 mmol), and fitted with a condenser. The solution was refluxed. After 2 h, the remaining catalyst was added.

After an additional 2 h, the solvent was removed by oil pump vacuum, and CH<sub>2</sub>Cl<sub>2</sub> (2 × 3 mL) was added to the oil. The sample was transferred in two portions to an alumina column (3 × 2.5 cm), which was eluted with CH<sub>2</sub>Cl<sub>2</sub> until UV monitoring showed no absorbing material (ca. 40 mL). The solvent was removed by oil pump vacuum to give a mixture of cyclized products as a yellow oil (0.305 g, 0.144 mmol; 96%).

NMR (δ, CDCl<sub>3</sub>),<sup>s4</sup> <sup>1</sup>H 7.45-7.43 (m, 16H of 8 Ph), 7.33-7.30 (m, 8H of 8 Ph), 7.26-7.22 (m, 16H of 8 Ph), 5.43-5.30 (m, 4H, CH=CH), 2.70-2.63 (m, 8H, PCH<sub>2</sub>), 2.03-1.99 (m, 16H, PCH<sub>2</sub>CH<sub>2</sub>, CH<sub>2</sub>CH=), 1.51-1.29 (m, 48H, remaining CH<sub>2</sub>); <sup>31</sup>P{<sup>1</sup>H} 14.5 (major, <sup>1</sup>J<sub>Pt</sub> = 2567),<sup>s7</sup> 14.4 (s), 14.2 (s).

MS,<sup>s8</sup> 2118 (M<sup>+</sup>, 100%).

***trans,trans*-(C<sub>6</sub>F<sub>5</sub>)(Ph<sub>2</sub>P(CH<sub>2</sub>)<sub>20</sub>PPh<sub>2</sub>)Pt(C≡C)<sub>4</sub>Pt(Ph<sub>2</sub>P(CH<sub>2</sub>)<sub>20</sub>PPh<sub>2</sub>)(C<sub>6</sub>F<sub>5</sub>) (4) and *trans,trans*-(C<sub>6</sub>F<sub>5</sub>)(Ph<sub>2</sub>P(CH<sub>2</sub>)<sub>20</sub>PPh<sub>2</sub>)Pt(C≡C)<sub>4</sub>Pt(Ph<sub>2</sub>P(CH<sub>2</sub>)<sub>20</sub>PPh<sub>2</sub>)(C<sub>6</sub>F<sub>5</sub>) (5).** A Schlenk flask was charged with metathesized **3a** (0.305 g, 0.144 mmol), Pd/C (0.014 g, 0.009 mmol), Cl-CH<sub>2</sub>CH<sub>2</sub>Cl (8 mL), and ethanol (5 mL), flushed with H<sub>2</sub>, and fitted with a balloon filled with H<sub>2</sub>. The mixture was stirred for 14 d. The solvent was removed by oil pump vacuum. The residue was extracted with CH<sub>2</sub>Cl<sub>2</sub> and eluted through an alumina column until UV monitoring showed no absorbing material (ca. 40 mL). The solvent was removed by oil pump vacuum to give crude **4/5** (0.212 g, 69% total). Chromatography on a silica gel column (25 × 2 cm, 80:20 v/v hexanes/CH<sub>2</sub>-Cl<sub>2</sub>) gave fractions containing **4** (0.0551 g, 0.052 mmol; 17%), a **4/5** mixture (2:1 by <sup>31</sup>P NMR; 0.0982 g, 0.0932 mmol; 31%), and **5** (0.0488 g, 0.0461 mmol; 15%). These were isolated as yellow powders following solvent removal by oil pump vacuum.

**4:** Calcd for C<sub>112</sub>H<sub>120</sub>F<sub>10</sub>P<sub>4</sub>Pt<sub>2</sub>: C, 61.13; H, 5.70. Found: C, 60.82; H, 5.71. Dec pt >190 °C (gradual darkening without melting). DSC: exotherm with T<sub>i</sub>, 102.1 °C; T<sub>e</sub>, 113.2 °C; T<sub>p</sub>, 121.7 °C; T<sub>c</sub>, 126.6 °C; T<sub>f</sub>, 137.7 °C; endotherm with T<sub>i</sub>, 197.7 °C; T<sub>e</sub>, 218.7 °C; T<sub>p</sub>, 225.2 °C; T<sub>c</sub>, 226.9 °C; T<sub>f</sub>, 230.5 °C. TGA: weight loss 29%, 272-402 °C.

NMR (δ, CDCl<sub>3</sub>),<sup>s4</sup> <sup>1</sup>H 7.42-7.38 (m, 16H of 8 Ph), 7.30-7.26 (m, 8H of 8 Ph), 7.24-7.19 (m, 16H of 8 Ph), 2.63-2.62 (m, 8H, PCH<sub>2</sub>), 1.92 (m, 8H, PCH<sub>2</sub>CH<sub>2</sub>), 1.52 (m, 8H, PCH<sub>2</sub>CH<sub>2</sub>CH<sub>2</sub>), 1.23-1.13 (m, 60 H, remaining CH<sub>2</sub>); <sup>13</sup>C{<sup>1</sup>H}<sup>s5,s10</sup> 132.7 (virtual t, <sup>2</sup>J<sub>CP</sub> = 5.8 Hz,<sup>s6</sup> *i* to P), 131.3 (virtual t, <sup>1</sup>J<sub>CP</sub> = 27.9 Hz,<sup>s6</sup> *i* to P), 130.1 (s, *p* to P), 127.7 (virtual t, <sup>3</sup>J<sub>CP</sub> = 5.0 Hz,<sup>s6</sup> *m* to P), 93.4

(s, PtC≡C), 68.2 (s, PtC≡CC), 57.5 (s, PtC≡CC≡C), 31.1 (virtual t,  $^3J_{CP} = 7.7$  Hz,<sup>s6</sup> PCH<sub>2</sub>CH<sub>2</sub>CH<sub>2</sub>), 29.04 (s, CH<sub>2</sub>), 28.94 (s, CH<sub>2</sub>), 28.93 (s, CH<sub>2</sub>), 28.87 (s, CH<sub>2</sub>), 28.68 (s, CH<sub>2</sub>), 28.61 (s, CH<sub>2</sub>), 27.9 (virtual t,  $^1J_{CP} = 18.1$  Hz,<sup>s6</sup> PCH<sub>2</sub>), 25.5 (br s, PCH<sub>2</sub>CH<sub>2</sub>);  $^{31}\text{P}\{^1\text{H}\}$  14.6 (s,  $^1J_{\text{Ppt}} = 2569$  Hz).<sup>s7</sup>

IR (cm<sup>-1</sup>, powder film),  $\nu_{\text{C}\equiv\text{C}}$  2144 (m), 2001 (w); UV-vis (1.25 × 10<sup>-5</sup> M, CH<sub>2</sub>Cl<sub>2</sub>) nm ( $\epsilon$ , M<sup>-1</sup>cm<sup>-1</sup>), 263 (87500), 290 (110900), 318 (136100), 352 (6350), 379 (5500), 410 (3000); MS,<sup>s8</sup> 2121 (M<sup>+</sup>, 100%), 1953 ([M-C<sub>6</sub>F<sub>5</sub>]<sup>+</sup>, 10%).

**5**: Calcd for C<sub>108</sub>H<sub>120</sub>F<sub>10</sub>P<sub>4</sub>Pt<sub>2</sub>: C, 61.07; H, 5.70. Found: C, 60.42; H, 5.62. DSC: exotherm with T<sub>i</sub>, 144.8 °C; T<sub>e</sub>, 154.9 °C; T<sub>c</sub>, 173.9 °C; T<sub>f</sub>, 211.7 °C; endotherm with T<sub>i</sub>, 220.5 °C; T<sub>e</sub>, 241.1 °C; T<sub>c</sub>, 244.0 °C; T<sub>f</sub>, 249.6 °C. TGA: weight loss 34%, 260.7-409.6 °C.

NMR ( $\delta$ , CDCl<sub>3</sub>),<sup>s4</sup>  $^1\text{H}$  7.45-7.39 (m, 16H of 8Ph), 7.31-2.27 (m, 8H of 8 Ph), 7.24-7.20 (m, 16H of 8 Ph), 2.60-2.55 (m, 8H, PCH<sub>2</sub>), 1.87-1.82 (m, 8H, PCH<sub>2</sub>CH<sub>2</sub>), 1.37-1.21 (m, 64H, remaining CH<sub>2</sub>);  $^{13}\text{C}\{^1\text{H}\}$ <sup>s5,A</sup> 132.9 (virtual t,  $^2J_{CP} = 5.8$  Hz,<sup>s6</sup> *o* to P), 131.6 (virtual t,  $^1J_{CP} = 27.8$  Hz,<sup>s6</sup> *i* to P), 130.2 (s, *p* to P), 127.9 (virtual t,  $^3J_{CP} = 5.0$  Hz,<sup>s6</sup> *m* to P), 94.3 (s, PtC≡C), 63.6 (s, PtC≡CC), 58.5 (3s, PtC≡CC≡C), 31.2 (virtual t,  $^3J_{CP} = 7.7$  Hz,<sup>s6</sup> PCH<sub>2</sub>CH<sub>2</sub>CH<sub>2</sub>), 29.7 (s, CH<sub>2</sub>), 28.9 (s, CH<sub>2</sub>), 28.8 (s, CH<sub>2</sub>), 28.6 (s, CH<sub>2</sub>), 28.3 (s, CH<sub>2</sub>), 27.9 (CH<sub>2</sub>), 27.8 (s, CH<sub>2</sub>), 25.7 (s, PCH<sub>2</sub>-CH<sub>2</sub>);  $^{31}\text{P}\{^1\text{H}\}$  14.3 (s,  $^1J_{\text{Ppt}} = 2574$  Hz).<sup>s7</sup>

IR (cm<sup>-1</sup>, powder film),  $\nu_{\text{C}\equiv\text{C}}$  2146 (m), 2003 (w); UV-vis (1.25 × 10<sup>-6</sup> M, CH<sub>2</sub>Cl<sub>2</sub>) nm ( $\epsilon$ , M<sup>-1</sup>cm<sup>-1</sup>), 263 (64500), 291 (75000), 320 (93000), 352 (5300), 379 (4900), 410 (2400); MS,<sup>s8</sup> 2121 (M<sup>+</sup>, 100%), 869 ([C<sub>6</sub>F<sub>5</sub>)PtPh<sub>2</sub>P(CH<sub>2</sub>)<sub>20</sub>PPh<sub>2</sub>]<sup>+</sup>, 100%).

**Br(CH<sub>2</sub>)<sub>4</sub>O(CH<sub>2</sub>)<sub>2</sub>CH=CH<sub>2</sub>**. A Schlenk flask was fitted with a condenser and charged with sodium (0.831 g, 36.1 mmol). Then HO(CH<sub>2</sub>)<sub>2</sub>CH=CH<sub>2</sub> (12.0 mL, 139 mmol) was slowly added with stirring. The mixture was heated at 80 °C until the sodium dissolved (ca. 2 h). Then Br(CH<sub>2</sub>)<sub>4</sub>Br was added (8.3 mL, 73 mmol), and the mixture was refluxed. After 3 h, the excess alcohol was recovered by distillation (110 °C). The residue was allowed to cool and poured into water (30 mL). The organic layer was separated. The aqueous layer was washed with ether (2 × 10 mL). The combined organic phases were washed with water (2 × 5 mL) and dried (CaCl<sub>2</sub>). The solvent was removed by rotary evaporation. The residue was chromatographed on a silica gel column (20 × 2.5 cm, 70:30 v/v hexanes/CH<sub>2</sub>Cl<sub>2</sub>). The first fraction contained the excess

Br(CH<sub>2</sub>)<sub>4</sub>Br. The solvent was removed from the second fraction by rotary evaporation and oil pump vacuum to give Br(CH<sub>2</sub>)<sub>4</sub>O(CH<sub>2</sub>)<sub>2</sub>CH=CH<sub>2</sub> as a colorless oil (4.284 g, 19.92 mmol; 51%).

NMR (δ, CDCl<sub>3</sub>), <sup>1</sup>H 5.79 (ddt, 1H, <sup>3</sup>J<sub>HHtrans</sub> = 17.1 Hz, <sup>3</sup>J<sub>HHcis</sub> = 10.3 Hz, <sup>3</sup>J<sub>HH</sub> = 6.8 Hz, CH=CH<sub>2</sub>), 5.05 (br d, 1H, <sup>3</sup>J<sub>HHtrans</sub> = 17.2 Hz, CH<sub>E</sub>H<sub>Z</sub>), 5.00 (br d, 1H, <sup>3</sup>J<sub>HHcis</sub> = 10.2 Hz, CH<sub>E</sub>H<sub>Z</sub>), 3.45-3.39 (m, 6H, BrCH<sub>2</sub>CH<sub>2</sub>CH<sub>2</sub>CH<sub>2</sub>OCH<sub>2</sub>), 2.32-2.27 (m, 2H, CH<sub>2</sub>CH=CH<sub>2</sub>), 1.93-1.88 and 1.70-1.67 (2m, 4H, BrCH<sub>2</sub>CH<sub>2</sub>CH<sub>2</sub>); <sup>13</sup>C{<sup>1</sup>H} 135.2 (s, CH=CH<sub>2</sub>), 116.3 (s, CH=CH<sub>2</sub>), 70.1 and 69.7 (2s, CH<sub>2</sub>OCH<sub>2</sub>), 34.2 and 33.8 (2s, CH<sub>2</sub>CH=CH<sub>2</sub> and BrCH<sub>2</sub>), 29.7 and 28.2 (2s, BrCH<sub>2</sub>CH<sub>2</sub>CH<sub>2</sub>).

**Ph<sub>2</sub>P(CH<sub>2</sub>)<sub>4</sub>O(CH<sub>2</sub>)<sub>2</sub>CH=CH<sub>2</sub>.** A Schlenk flask was charged with Br(CH<sub>2</sub>)<sub>4</sub>O(CH<sub>2</sub>)<sub>2</sub>CH=CH<sub>2</sub> (0.929 g, 4.49 mmol) and THF (20 mL), and cooled to 0 °C. Then KPPH<sub>2</sub> (0.5 M in THF, 9.0 mL, 4.5 mmol) was added dropwise with stirring until a red color persisted. A white precipitate formed. The mixture was stirred for 0.5 h at 0 °C, and the cold bath was removed. After 1 h, the solvent was removed by oil pump vacuum. The residue was extracted with CH<sub>2</sub>Cl<sub>2</sub>. The extract was filtered through a short silica gel column (5 × 2.5 cm), which was rinsed with CH<sub>2</sub>Cl<sub>2</sub>. The solvent was removed by oil pump vacuum to give Ph<sub>2</sub>P(CH<sub>2</sub>)<sub>4</sub>O(CH<sub>2</sub>)<sub>2</sub>CH=CH<sub>2</sub> as an air sensitive, spectroscopically pure white oil (1.16 g, 3.73 mmol; 83%).

NMR (δ, CDCl<sub>3</sub>), <sup>1</sup>H 7.45-7.37 (m, 4H, of 2 Ph), 7.33-7.29 (m, 6H, of 2 Ph), 5.81-5.74 (m, 1H, CH=CH<sub>2</sub>), 5.07-4.98 (m, 2H, CH=CH<sub>2</sub>), 3.43-3.38 (m, 4H, CH<sub>2</sub>OCH<sub>2</sub>), 2.34-2.26 (m, 2H, PCH<sub>2</sub>), 2.07-2.00 (m, 2H, CH<sub>2</sub>CH=), 1.70-1.67 (m, 2H, PCH<sub>2</sub>CH<sub>2</sub>), 1.54-1.47 (m, 2H, OCH<sub>2</sub>CH<sub>2</sub>); <sup>13</sup>C{<sup>1</sup>H} <sup>s11</sup> 138.8 (d, <sup>1</sup>J<sub>CP</sub> = 13.0 Hz, *i* to P), 135.3 (s, CH=CH<sub>2</sub>), 132.6 (d, <sup>2</sup>J<sub>CP</sub> = 18.4 Hz, *o* to P), 128.4 (s, *p* to P), 128.3 (d, <sup>3</sup>J<sub>CP</sub> = 6.5 Hz, *m* to P), 116.2 (s, CH=CH<sub>2</sub>), 70.3 and 70.0 (2 s, CH<sub>2</sub>OCH<sub>2</sub>), 34.2 (s, CH<sub>2</sub>CH=), 31.1 (d, <sup>1</sup>J<sub>CP</sub> = 13.0 Hz, PCH<sub>2</sub>CH<sub>2</sub>CH<sub>2</sub>), 27.9 (d, <sup>1</sup>J<sub>CP</sub> = 11.2 Hz, PCH<sub>2</sub>), 22.7 (d, <sup>1</sup>J<sub>CP</sub> = 16.7 Hz, PCH<sub>2</sub>CH<sub>2</sub>); <sup>31</sup>P{<sup>1</sup>H} -15.8 (s).

***trans*-(C<sub>6</sub>F<sub>5</sub>)(Ph<sub>2</sub>P(CH<sub>2</sub>)<sub>4</sub>O(CH<sub>2</sub>)<sub>2</sub>CH=CH<sub>2</sub>)<sub>2</sub>PtCl (1b).** A Schlenk flask was charged with [Pt(μ-Cl)(C<sub>6</sub>F<sub>5</sub>)(tht)]<sub>2</sub> (0.721 g, 0.752 mmol)<sup>s3</sup> and CH<sub>2</sub>Cl<sub>2</sub> (30 mL). Then Ph<sub>2</sub>P(CH<sub>2</sub>)<sub>4</sub>O(CH<sub>2</sub>)<sub>2</sub>CH=CH<sub>2</sub> (1.032 g, 3.304 mmol) was added with stirring. After 20 h, the solution was filtered through a Celite/decolorizing carbon pad. The solvent was removed by rotary evaporation. The residue was chromatographed on an alumina column (20 × 2.0 cm, 90:10 v/v hexanes/ethyl acetate). The solvent was removed from the product-containing fractions by oil pump vacuum to

give **1b** as a colorless oil (0.795 g, 0.803 mmol; 52%). Calcd for C<sub>46</sub>H<sub>50</sub>ClF<sub>5</sub>O<sub>2</sub>P<sub>2</sub>Pt; C, 54.04; H, 4.93. Found: C, 54.10; H, 5.02.

NMR ( $\delta$ , CDCl<sub>3</sub>), <sup>s12</sup> <sup>1</sup>H 7.52-7.41 (m, 8H of 4 Ph), 7.34-7.32 (m, 4H, of 4 Ph), 7.27-7.26 (m, 8H of 4 Ph), 5.84-5.76 (m, 2H, CH=CH<sub>2</sub>), 5.07 (br d, 2H, <sup>3</sup>J<sub>HHtrans</sub> = 17.2 Hz, CH<sub>E</sub>H<sub>Z</sub>), 5.00 (br d, 2H, <sup>3</sup>J<sub>HHcis</sub> = 10.2 Hz, CH<sub>E</sub>H<sub>Z</sub>), 3.48-3.45 (m, 8H, CH<sub>2</sub>OCH<sub>2</sub>), 2.65-2.64 (m, 4H, PCH<sub>2</sub>), 2.35-2.31 (m, 4H, CH<sub>2</sub>CH=), 1.98-1.97 (m, 4H, PCH<sub>2</sub>CH<sub>2</sub>), 1.74-1.73 (m, 4H, PCH<sub>2</sub>CH<sub>2</sub>CH<sub>2</sub>); <sup>13</sup>C{<sup>1</sup>H} 135.7 (s, CH=CH<sub>2</sub>), 133.5 (virtual t, <sup>2</sup>J<sub>CP</sub> = 5.7 Hz, <sup>s6</sup> *o* to P), 131.0 (virtual t, <sup>1</sup>J<sub>CP</sub> = 27.3 Hz, <sup>s6</sup> *i* to P), 130.7 (s, *p* to P), 128.4 (virtual t, <sup>3</sup>J<sub>CP</sub> = 5.0 Hz, <sup>s6</sup> *m* to P), 116.7 (s, CH=CH<sub>2</sub>), 70.6 and 70.5 (2 s, CH<sub>2</sub>OCH<sub>2</sub>), 34.7 (s, CH<sub>2</sub>CH=), 31.5 (virtual t, <sup>2</sup>J<sub>CP</sub> = 7.4 Hz, <sup>s6</sup> PCH<sub>2</sub>CH<sub>2</sub>CH<sub>2</sub>), 26.0 (virtual t, <sup>1</sup>J<sub>CP</sub> = 16.9 Hz, <sup>s6</sup> PCH<sub>2</sub>), 22.7 (s, PCH<sub>2</sub>CH<sub>2</sub>); <sup>31</sup>P{<sup>1</sup>H} 16.48 (s, <sup>1</sup>J<sub>Ppt</sub> = 2658 Hz).<sup>s7</sup>

IR (cm<sup>-1</sup>, oil film), 3078 (vw), 3060 (vw), 2935 (w), 2912 (w), 2860 (w), 1640 (w), 1501 (s), 1461 (s), 1436 (ms), 1364 (w), 1104 (s), 1059 (m), 957 (vs), 915 (m), 805 (m), 739 (s), 691 (vs); MS, <sup>s8</sup> 986 ([M-Cl]<sup>+</sup>, 100), 818 (18) [M-Cl-C<sub>6</sub>F<sub>5</sub>]<sup>+</sup>, 18%), and other fragments.

**trans-(C<sub>6</sub>F<sub>5</sub>)(Ph<sub>2</sub>P(CH<sub>2</sub>)<sub>4</sub>O(CH<sub>2</sub>)<sub>2</sub>CH=CH<sub>2</sub>)<sub>2</sub>Pt(C≡C)<sub>2</sub>H (2b).** A Schlenk flask was charged with **1b** (0.765 g, 0.269 mmol), CuI (0.285 g, 0.149 mmol, 0.2 equiv), and HNEt<sub>2</sub> (70 mL) with stirring, and cooled to -45 °C. Then H(C≡C)<sub>2</sub>H (9 mL, 15.3 mmol, ≈ 1.7 M in THF)<sup>s9</sup> was added via syringe, and the mixture turned yellow. After 3 h, the cold bath was removed. After an additional 1 h, the solvent was removed by oil pump vacuum. The residue was extracted with 50:50 v/v toluene/ethyl acetate. The extract was chromatographed on an alumina column (10 × 2 cm, 50:50 v/v hexanes/ethyl acetate). The solvent was removed from the product-containing fractions by oil pump vacuum to give **2b** as a yellow oil (0.752 g, 0.261 mmol; 97%). Calcd for C<sub>50</sub>H<sub>51</sub>F<sub>5</sub>O<sub>2</sub>P<sub>2</sub>Pt; C, 57.97; H, 4.96. Found: C, 58.16; H, 5.06.

NMR ( $\delta$ , CDCl<sub>3</sub>), <sup>s13</sup> <sup>1</sup>H 7.49-7.46 (m, 8H of 4 Ph), 7.34-7.32 (m, 4H of 4 Ph), 7.28-7.24 (m, 8H of 4 Ph), 5.79 (ddt, 2H, <sup>3</sup>J<sub>HHtrans</sub> = 17.1 Hz, *J*<sub>HHcis</sub> = 10.3 Hz, <sup>3</sup>J<sub>HH</sub> = 6.7 Hz, CH=CH<sub>2</sub>), 5.06 (br d, 2H, <sup>3</sup>J<sub>HHtrans</sub> = 17.2 Hz, CH<sub>E</sub>H<sub>Z</sub>), 4.99 (br d, 2H, <sup>3</sup>J<sub>HHcis</sub> = 10.7 Hz, CH<sub>E</sub>H<sub>Z</sub>), 3.46-3.42 (m, 8H, CH<sub>2</sub>OCH<sub>2</sub>), 2.65-2.63 (m, 4H, PCH<sub>2</sub>), 2.32-2.29 (m, 4H, CH<sub>2</sub>CH=), 1.86-1.85 (m, 4H, PCH<sub>2</sub>CH<sub>2</sub>), 1.72-1.66 (m, 4H, PCH<sub>2</sub>CH<sub>2</sub>CH<sub>2</sub>), 1.66 (s, 1H, C≡CH); <sup>13</sup>C{<sup>1</sup>H} 135.3 (s, CH=CH<sub>2</sub>), 133.1 (virtual t, <sup>2</sup>J<sub>CP</sub> = 5.9 Hz, <sup>s6</sup> *o* to P), 131.0 (virtual t, <sup>1</sup>J<sub>CP</sub> = 27.9 Hz, <sup>s6</sup> *i* to P), 130.3 (s, *p* to P), 127.9 (virtual t, <sup>3</sup>J<sub>CP</sub> = 5.1 Hz, <sup>s6</sup> *m* to P), 116.2 (s, CH=CH<sub>2</sub>), 92.4 (s, PtC≡C), 72.3 (s, C≡CH) 70.1



and 70.0 (2 s, CH<sub>2</sub>OCH<sub>2</sub>), 34.1 (s, CH<sub>2</sub>CH=), 31.0 (virtual t, <sup>2</sup>J<sub>CP</sub> = 7.4 Hz, <sup>s6</sup> PCH<sub>2</sub>CH<sub>2</sub>CH<sub>2</sub>), 27.9 (virtual t, <sup>1</sup>J<sub>CP</sub> = 17.9 Hz, <sup>s6</sup> PCH<sub>2</sub>), 22.2 (s, PCH<sub>2</sub>CH<sub>2</sub>); <sup>31</sup>P {<sup>1</sup>H} 14.0 (s, <sup>1</sup>J<sub>PPt</sub> = 2569 Hz).<sup>s7</sup>

IR (cm<sup>-1</sup>, oil film), ν<sub>≡CH</sub> 3308 (w), ν<sub>C≡C</sub> 2150 (m); MS, <sup>s8</sup> 1037 (M<sup>+</sup>, 33%), 986 ([M-C<sub>4</sub>H]<sup>+</sup>, 100%), and other fragments.

**trans,trans-(C<sub>6</sub>F<sub>5</sub>)(Ph<sub>2</sub>P(CH<sub>2</sub>)<sub>4</sub>O(CH<sub>2</sub>)<sub>2</sub>CH=CH<sub>2</sub>)<sub>2</sub>Pt(C≡C)<sub>4</sub>Pt(Ph<sub>2</sub>P(CH<sub>2</sub>)<sub>4</sub>O(CH<sub>2</sub>)<sub>2</sub>-CH=CH<sub>2</sub>)<sub>2</sub>(C<sub>6</sub>F<sub>5</sub>) (3b).** A three necked flask was charged with **2b** (0.205 g, 0.200 mmol) and acetone (20 mL), and fitted with a gas inlet needle and a condenser. A Schlenk flask was charged with CuCl (0.090 g, 0.091 mmol) and acetone (20 mL), and TMEDA (0.180 mL, 1.08 mmol) was added with stirring. After 0.5 h, stirring was halted (blue supernatant/yellow-green solid). Then O<sub>2</sub> was bubbled through the three necked flask with stirring, and the solution was heated to 60 °C. The blue supernatant was added in portions. After 4 h, the solvent was removed by rotary evaporation and oil pump vacuum. The residue was extracted with ethyl acetate and filtered through an alumina column. The solvent was removed from the filtrate by rotary evaporation to give **2b** as a yellow oil (0.177 g, 0.855 mmol; 86%).<sup>s14</sup>

NMR (δ, CDCl<sub>3</sub>), <sup>s13</sup> <sup>1</sup>H 7.48-7.45 (m, 16H of 8 Ph), 7.42-7.38 (m, 8H of 8 Ph), 7.34-7.31 (m, 16H of 8 Ph), 5.80 (ddt, 4H, <sup>3</sup>J<sub>HHtrans</sub> = 17.1 Hz, J<sub>HHcis</sub> = 10.3 Hz, <sup>3</sup>J<sub>HH</sub> = 6.7 Hz, CH=CH<sub>2</sub>), 5.06 (br d, 2H, <sup>3</sup>J<sub>HHtrans</sub> = 17.2 Hz, CH<sub>E</sub>H<sub>Z</sub>), 4.99 (br d, 2H, <sup>3</sup>J<sub>HHcis</sub> = 10.2 Hz, CH<sub>E</sub>H<sub>Z</sub>), 3.43-3.40 (m, 16H, CH<sub>2</sub>OCH<sub>2</sub>), 2.61-2.59 (m, 8H, PCH<sub>2</sub>), 2.32-2.29 (m, 8H, CH<sub>2</sub>CH=), 1.85-1.83 (m, 8H, PCH<sub>2</sub>CH<sub>2</sub>), 1.69-1.65 (m, 8H, PCH<sub>2</sub>CH<sub>2</sub>CH<sub>2</sub>); <sup>13</sup>C {<sup>1</sup>H} 135.4 (s, CH=CH<sub>2</sub>), 133.0 (virtual t, <sup>2</sup>J<sub>CP</sub> = 5.8 Hz, <sup>s6</sup> o to P), 131.0 (virtual t, <sup>1</sup>J<sub>CP</sub> = 27.9 Hz, <sup>s6</sup> i to P), 130.3 (s, p to P), 127.9 (virtual t, <sup>3</sup>J<sub>CP</sub> = 5.0 Hz, <sup>s6</sup> m to P), 116.2 (s, CH=CH<sub>2</sub>), 94.1 (s, PtC≡C), 70.1 and 70.0 (2 s, CH<sub>2</sub>OCH<sub>2</sub>), 63.7 (s, PtC≡CC≡C), 58.1 (s, PtC≡CC≡C), 34.2 (s, CH<sub>2</sub>CH=), 30.9 (virtual t, <sup>2</sup>J<sub>CP</sub> = 7.5 Hz, <sup>s6</sup> PCH<sub>2</sub>CH<sub>2</sub>CH<sub>2</sub>), 27.9 (virtual t, <sup>1</sup>J<sub>CP</sub> = 17.9 Hz, <sup>s6</sup> PCH<sub>2</sub>), 22.2 (s, PCH<sub>2</sub>CH<sub>2</sub>); <sup>31</sup>P {<sup>1</sup>H} 14.0 (s, <sup>1</sup>J<sub>PPt</sub> = 2569 Hz).<sup>s7</sup>

IR (cm<sup>-1</sup>, oil film), ν<sub>C≡C</sub> 2142 (m), 2001 (w); MS, <sup>s8</sup> 2068 (M<sup>+</sup>, 40%), 1396 ([ (Ph<sub>2</sub>PCH<sub>2</sub>CH<sub>2</sub>CH<sub>2</sub>)<sub>2</sub>PtC<sub>8</sub>Pt(Ph<sub>2</sub>PCH<sub>2</sub>CH<sub>2</sub>CH<sub>2</sub>)<sub>2</sub> ], 100%), 985 ([Pt(C<sub>6</sub>F<sub>5</sub>)(PPh<sub>2</sub>(CH<sub>2</sub>)<sub>4</sub>O(CH<sub>2</sub>)<sub>2</sub>CH=CH<sub>2</sub>)<sub>2</sub>]<sup>+</sup>, 80%), and other fragments.

**Alkene Metathesis of 3b. A.** A two necked Schlenk flask was charged with **3b** (0.211 g, 0.102 mmol), Ru(=CHPh)(PCy<sub>3</sub>)<sub>2</sub>(Cl) (ca. half of 0.006 g, 0.006 mmol), and CH<sub>2</sub>Cl<sub>2</sub> (150 mL),

and fitted with a condenser. The solution was refluxed. After 2 h, the remaining catalyst was added. After an additional 2 h, the solvent was removed by oil pump vacuum, and CH<sub>2</sub>Cl<sub>2</sub> was added to the oil. The sample was filtered through an alumina column (4 × 2 cm), which was eluted with CH<sub>2</sub>Cl<sub>2</sub> until UV monitoring showed no absorbing material. A <sup>1</sup>H NMR spectrum showed 44% conversion. The sample was redissolved in CH<sub>2</sub>Cl<sub>2</sub> (150 mL), and refluxed with additional Ru(=CHPh)(PCy<sub>3</sub>)<sub>2</sub>(Cl) (0.012 g, 0.010 mmol; added in three portions over 6 h). An analogous workup and analysis showed 80% conversion. A third cycle (0.006 g, 0.006 mmol of Ru(=CHPh)(PCy<sub>3</sub>)<sub>2</sub>(Cl)) gave a mixture of cyclized products as a yellow oil (0.198 g, 0.0972 mmol; 96%).

<sup>31</sup>P{<sup>1</sup>H} NMR (δ, CDCl<sub>3</sub>) 16.6 (s), 16.5 (s), 16.3 (s), 14.2 (s), 14.12 (s, <sup>1</sup>J<sub>Pt</sub> = 2569 Hz, major),<sup>s7</sup> 14.05 (s), 14.0 (s).

**B.** A two necked Schlenk flask was charged with **3b** (0.278 g, 0.134 mmol), Ru(=CHPh)(H<sub>2</sub>IMes)(PCy<sub>3</sub>)(Cl) (ca. half of 0.007 g, 0.008 mmol), and CH<sub>2</sub>Cl<sub>2</sub> (125 mL), and fitted with a condenser. The solution was refluxed. After 2 h, the remaining catalyst was added. After an additional 3 h, the solvent was removed by oil pump vacuum, and CH<sub>2</sub>Cl<sub>2</sub> was added to the oil. The sample was filtered through an alumina column (4 × 2.5 cm), which was eluted with CH<sub>2</sub>Cl<sub>2</sub> until UV monitoring showed no absorbing material. The solvent was removed from the filtrate by oil pump vacuum to give a mixture of cyclized products as a yellow oil (0.261 g, 0.130 mmol; 97%).

<sup>31</sup>P{<sup>1</sup>H} NMR (δ, CDCl<sub>3</sub>) 14.17 (s, <sup>1</sup>J<sub>Pt</sub> = 2571 Hz, major),<sup>s7</sup> 14.1, 14.02, 13.98.

*trans,trans*-(C<sub>6</sub>F<sub>5</sub>)(Ph<sub>2</sub>P(CH<sub>2</sub>)<sub>4</sub>O(CH<sub>2</sub>)<sub>6</sub>O(CH<sub>2</sub>)<sub>4</sub>PPh<sub>2</sub>)Pt(C≡C)<sub>4</sub>Pt(Ph<sub>2</sub>P(CH<sub>2</sub>)<sub>4</sub>O(CH<sub>2</sub>)<sub>6</sub>O(CH<sub>2</sub>)<sub>4</sub>PPh<sub>2</sub>)(C<sub>6</sub>F<sub>5</sub>) (**6**). A Schlenk flask was charged with metathesized **3b** (0.261 g, 0.130 mmol), Pd/C (0.028 g, 0.026 mmol), ClCH<sub>2</sub>CH<sub>2</sub>Cl (15 mL), and ethanol (10 mL), flushed with H<sub>2</sub>, and fitted with a balloon filled with H<sub>2</sub>. The mixture was stirred for 14 d. The solvent was removed by oil pump vacuum. The residue was extracted with CH<sub>2</sub>Cl<sub>2</sub> and filtered through an alumina column. The solvent was removed by oil pump vacuum. The residue was chromatographed on an alumina column (15 × 5 cm, 80:20 v/v hexanes/ethyl acetate). The solvent was removed from the first product-containing fraction by oil pump vacuum to give **6** as a yellow solid (0.070 g, 0.039 mmol; 27%). Calcd for C<sub>96</sub>H<sub>96</sub>Pt<sub>2</sub>P<sub>4</sub>F<sub>10</sub>O<sub>4</sub>: C, 57.14; H, 4.79. Found: C, 56.25; H, 4.65. DSC: endotherm with T<sub>i</sub>, 175.4 °C; T<sub>e</sub>, 203.7 °C; T<sub>c</sub>, 215.1 °C; T<sub>f</sub>, 228.1 °C. TGA: weight loss 42%, 265-410 °C.

NMR ( $\delta$ ,  $\text{CDCl}_3$ ), <sup>s15</sup> <sup>1</sup>H 7.41-7.37 (m, 16H of 8 Ph), 7.33-7.26 (m, 8H of 8 Ph), 7.26-7.20 (m, 16H of 8 Ph), 3.49 (t, <sup>3</sup> $J_{\text{HH}} = 6.5$  Hz, 8H,  $\text{PCH}_2\text{CH}_2\text{CH}_2\text{CH}_2\text{O}$ ), 3.38 (t, <sup>3</sup> $J_{\text{HH}} = 6.7$  Hz, 8H,  $\text{OCH}_2\text{CH}_2\text{CH}_2$ ), 2.75-2.71 (m, 8H,  $\text{PCH}_2$ ), 2.05-2.03 (m, 8H,  $\text{PCH}_2\text{CH}_2$ ), 1.80-1.77 (m, 8H,  $\text{PCH}_2\text{CH}_2\text{CH}_2$ ), 1.49-1.46 (m, 8H,  $\text{OCH}_2\text{CH}_2\text{CH}_2$ ), 1.29-1.24 (m, 8H,  $\text{OCH}_2\text{CH}_2\text{CH}_2$ ); <sup>13</sup>C{<sup>1</sup>H}, 145.8 (dm, <sup>1</sup> $J_{\text{CF}} = 224$  Hz, *o* to Pt), 136.4 (dm, <sup>1</sup> $J_{\text{CF}} = 233$  Hz, *m/p* to Pt), 132.8 (br s, *o* to P), 131.2 (virtual t, <sup>1</sup> $J_{\text{CP}} = 27.5$  Hz, <sup>s6</sup> *i* to P), 130.3 (s, *p* to P), 127.9 (br s, *m* to P), 100.1 (s,  $\text{PtC}\equiv\text{C}$ ), 94.3 (s,  $\text{PtC}\equiv\text{C}$ ), 70.6 (s,  $\text{PCH}_2\text{CH}_2\text{CH}_2\text{CH}_2\text{O}$ ), 70.1 (s,  $\text{OCH}_2\text{CH}_2\text{CH}_2$ ), 63.8 (s,  $\text{PtC}\equiv\text{CC}\equiv\text{C}$ ), 58.3 (s,  $\text{PtC}\equiv\text{CC}\equiv\text{C}$ ), 30.8 (virtual t, <sup>2</sup> $J_{\text{CP}} = 7.6$  Hz, <sup>s6</sup>  $\text{PCH}_2\text{CH}_2\text{CH}_2$ ), 29.4 (s,  $\text{OCH}_2\text{CH}_2\text{CH}_2$ ), 28.0 (virtual t, <sup>1</sup> $J_{\text{CP}} = 17.5$  Hz, <sup>s6</sup>  $\text{PCH}_2$ ), 25.4 (s,  $\text{OCH}_2\text{CH}_2\text{CH}_2$ ), 22.7 (s,  $\text{PCH}_2\text{CH}_2$ ); <sup>31</sup>P{<sup>1</sup>H} 14.1 (s, <sup>1</sup> $J_{\text{PPt}} = 2566$  Hz).<sup>s7</sup>

IR ( $\text{cm}^{-1}$ , powder film),  $\nu_{\text{C}\equiv\text{C}}$  2142 (m), 2001 (w); UV-vis ( $1.25 \times 10^{-5}$  M,  $\text{CH}_2\text{Cl}_2$ ) nm ( $\epsilon$ ,  $\text{M}^{-1}\text{cm}^{-1}$ ), 263 (8500), 291 (1040000), 320 (127000), 353 (7000), 379 (5900), 411 (3400); MS,<sup>s8</sup> 2017 ( $\text{M}^+$ , 100%).

**Cyclic Voltammetry.** A BAS CV-50W Voltammetric Analyzer (Cell Stand C3) with the program CV-50W (version 2.0) was employed. Cells were fitted with Pt working and counter electrodes, and a Ag wire pseudoreference electrode. All  $\text{CH}_2\text{Cl}_2$  solutions were  $7\text{-}9 \times 10^{-5}$  M in substrate, 0.1 M in  $n\text{-Bu}_4\text{N}^+ \text{BF}_4^-$  (crystallized from ethanol/hexane and dried by oil pump vacuum), and prepared under nitrogen. Ferrocene was subsequently added, and calibration voltammograms recorded. The ambient laboratory temperature was  $22.5 \pm 1$  °C.

**Crystallography. A.** A  $\text{CH}_2\text{Cl}_2$  solution of **4** was layered with ether. After three weeks, yellow prisms of **4** were analyzed using a Nonius KappaCCD area detector as outlined in Table S1. Cell parameters were obtained from 10 frames using a  $10^\circ$  scan and were refined with 18965 reflections. Lorentz, polarization, and absorption corrections<sup>s16</sup> were applied. The space groups were determined from systematic absences and subsequent least-squares refinement. The structure was solved by direct methods. The parameters were refined with all data by full-matrix-least-squares on  $F^2$  using SHELXL-97.<sup>s17</sup> Non-hydrogen atoms were refined with anisotropic thermal parameters. The hydrogen atoms were fixed in idealized positions using a riding model. Scattering factors were taken from the literature.<sup>s18</sup> Electron-density and anisotropic displacement plots showed the  $\text{sp}^3$  chain atoms C8A-C16A to be disordered over multiple orientations. This could not be modeled without

introducing some short hydrogen-hydrogen separations (the best solution with all hydrogen atoms was used for Figure 1). The structure was then solved without hydrogen atoms for C8A-C16A (tabular data below and CIF file). While some very large thermal ellipsoids and geometric distortions remain evident, the gross structure of **4** is undoubtedly correct. **B.** A CH<sub>2</sub>Cl<sub>2</sub> solution of **5** was layered with ethanol. After two weeks, yellow prisms of **5** were analyzed using a Nonius KappaCCD area detector as outlined in Table S7. Cell parameters were obtained from 10 frames using a 10° scan and were refined with 10456 reflections. Lorentz, polarization, and absorption corrections<sup>s16</sup> were applied. The space groups were determined from systematic absences and subsequent least-squares refinement. The structure was solved by direct methods. The parameters were refined with all data by full-matrix-least-squares on  $F^2$  using SHELXL-97.<sup>s17</sup> Non-hydrogen atoms were refined with anisotropic thermal parameters. The hydrogen atoms were fixed in idealized positions using a riding model. Scattering factors were taken from the literature.<sup>s18</sup> There is an inversion center at the midpoint between C4 and C4'. **C.** A CH<sub>2</sub>Cl<sub>2</sub> solution of **6** was layered with methanol. After one week, yellow prisms of **6**·MeOH were analyzed using a Nonius KappaCCD area detector as outlined in Table S13. Cell parameters were obtained from 10 frames using a 10° scan and were refined with 20654 reflections. Lorentz, polarization, and absorption corrections<sup>s16</sup> were applied. The space groups were determined from systematic absences and subsequent least-squares refinement. The structure was solved by direct methods. The parameters were refined with all data by full-matrix-least-squares on  $F^2$  using SHELXL-97.<sup>s17</sup> Non-hydrogen atoms were refined with anisotropic thermal parameters. The hydrogen atoms were fixed in idealized positions using a riding model. Scattering factors were taken from the literature.<sup>s18</sup> The molecule of MeOH was disordered and could only be poorly resolved.

## References and Notes

- (s1) Cammenga, H. K.; Epple, M. *Angew. Chem., Int. Ed. Engl.* **1995**, *34*, 1171; *Angew. Chem.* **1995**, *107*, 1284.
- (s2) Bauer, E. B.; Hampel, F.; Gladysz, J. A. *Organometallics*, **2003**, *22*, 5567.
- (s3) Usón, R.; Forniés, J.; Espinet, P; Alfranca, G. *Synth. React. Inorg. Met.-Org. Chem.* **1980**, *10*, 579.

- (s4) All complexes exhibit a characteristic pattern of  $^1\text{H}$  and  $^{13}\text{C}$  signals for the aryl rings and the  $\text{PCH}_2\text{CH}_2\text{CH}_2$  linkages. The signals were assigned by analogy to related platinum complexes.<sup>9a</sup>
- (s5) The  $\text{C}_6\text{F}_5$   $^{13}\text{C}$  signals were not observed.
- (s6) Hersh, W. H. *J. Chem. Educ.* **1997**, *74*, 1485; the J values represent the *apparent* coupling between adjacent peaks of the triplet.
- (s7) This coupling represents a satellite (d;  $^{195}\text{Pt} = 33.8\%$ ), and is not reflected in the peak multiplicity given.
- (s8) m/z for the most intense peak of the isotope envelope (relative intensity, %).
- (s9) Verkruijsee, H.; Brandsma, L. *Synth. Commun.* **1991**, *21*, 657. The THF solution can be stored at  $-78\text{ }^\circ\text{C}$  up to 7 days.
- (s10) The PtC  $^{13}\text{C}$  signal was not observed.
- (s11) The  $\text{PC}_6\text{H}_5$   $^{13}\text{C}$  signals were assigned as described by Mann, B. E. *J. Chem. Soc. Perkin Trans. 2*, **1972**, 30. The resonance with the chemical shift closest to benzene was attributed to the meta carbon, and the least intense phosphorous-coupled resonance was attributed to the ipso carbon.
- (s12) A  $^1\text{H}, ^{13}\text{C}\{^1\text{H}\}$  COSY spectrum was used to assign the signals.
- (s13) The signals were assigned by analogy to **1b**.
- (s14) A satisfactory microanalysis was not obtained for this compound.
- (s15)  $^1\text{H}, ^1\text{H}$  COSY and  $^1\text{H}, ^{13}\text{C}\{^1\text{H}\}$  COSY spectra (500 MHz) were used to assign the signals.
- (s16) (a) "Collect" data collection software, Nonius B.V., 1998. (b) "Scalepack" data processing software: Otwinowski, Z.; Minor, W. in *Methods Enzymol.* **1997**, *276*, 307.
- (s17) Sheldrick, G. M. *SHELX-97*, Program for refinement of crystal structures, University of Göttingen, 1997.
- (s18) Cromer, D. T.; Waber, J. T. in *International Tables for X-ray Crystallography*; Ibers, J. A.; Hamilton, W. C. Eds.; Kynoch: Birmingham, England, 1974.

Table S1. Crystal data and structure refinement for **4**.

|                                   |                                             |                           |
|-----------------------------------|---------------------------------------------|---------------------------|
| Empirical formula                 | $C_{108}H_{120}F_{10}P_4Pt_2$               |                           |
| Formula weight                    | 2122.10                                     |                           |
| Temperature                       | 173(2) K                                    |                           |
| Wavelength                        | 0.71073 Å                                   |                           |
| Crystal system                    | Monoclinic                                  |                           |
| Space group                       | $P2_1/c$                                    |                           |
| Unit cell dimensions              | $a = 39.9137(6)$ Å                          | $\alpha = 90^\circ$       |
|                                   | $b = 11.1431(2)$ Å                          | $\beta = 102.57(3)^\circ$ |
|                                   | $c = 22.6389(4)$ Å                          | $\gamma = 90^\circ$       |
| Volume                            | $9827.5(3)$ Å <sup>3</sup>                  |                           |
| Z                                 | 4                                           |                           |
| Density (calculated)              | 1.434 Mg/m <sup>3</sup>                     |                           |
| Absorption coefficient            | 2.974 mm <sup>-1</sup>                      |                           |
| F(000)                            | 4296                                        |                           |
| Crystal size                      | 0.20 × 0.20 × 0.20 mm <sup>3</sup>          |                           |
| Θ range for data collection       | 1.05 to 27.51°                              |                           |
| Index ranges                      | -51 ≤ h ≤ 51, -12 ≤ k ≤ 14, -29 ≤ l ≤ 29    |                           |
| Reflections collected             | 37122                                       |                           |
| Independent reflections           | 21370 [R(int) = 0.0490]                     |                           |
| Reflections [I > 2σ(I)]           | 14690                                       |                           |
| Completeness to Θ = 27.51°        | 94.5%                                       |                           |
| Absorption correction             | Empirical                                   |                           |
| Max. and min. transmission        | 0.5877 and 0.5877                           |                           |
| Refinement method                 | Full-matrix least-squares on F <sup>2</sup> |                           |
| Data / restraints / parameters    | 21370 / 7 / 1121                            |                           |
| Goodness-of-fit on F <sup>2</sup> | 0.974                                       |                           |
| Final R indices [I > 2σ(I)]       | R1 = 0.0413, wR2 = 0.0943                   |                           |
| R indices (all data)              | R1 = 0.0763, wR2 = 0.1088                   |                           |
| Largest diff. peak and hole       | 1.012 and -1.595 eÅ <sup>-3</sup>           |                           |

Table S2. Atomic coordinates ( $\times 10^4$ ) and equivalent isotropic displacement parameters ( $\text{\AA}^2 \times 10^3$ ) for **4**. U(eq) is defined as one third of the trace of the orthogonalized  $U^{ij}$  tensor.

|        | x       | y         | z       | U(eq)  |
|--------|---------|-----------|---------|--------|
| Pt(1)  | 3956(1) | -11226(1) | 5578(1) | 24(1)  |
| P(1)   | 4012(1) | -11607(1) | 4608(1) | 26(1)  |
| C(1B)  | 3387(1) | -10666(6) | 6505(2) | 40(1)  |
| C(1)   | 3533(1) | -10356(5) | 5193(2) | 29(1)  |
| C(1A)  | 3941(1) | -10266(5) | 4133(2) | 35(1)  |
| Pt(2)  | 1099(1) | -7689(1)  | 2321(1) | 31(1)  |
| P(2)   | 3845(1) | -10794(1) | 6512(1) | 27(1)  |
| C(2)   | 3273(1) | -9868(5)  | 4909(2) | 34(1)  |
| C(2B)  | 3156(2) | -11649(6) | 6185(3) | 46(2)  |
| C(2A)  | 4087(1) | -9096(4)  | 4444(2) | 32(1)  |
| P(3)   | 1026(1) | -9701(1)  | 2105(1) | 36(1)  |
| C(3)   | 2978(1) | -9388(5)  | 4572(2) | 34(1)  |
| C(3B)  | 2786(2) | -11223(7) | 6018(4) | 72(2)  |
| C(3A)  | 3913(2) | -7985(5)  | 4117(2) | 44(2)  |
| P(4)   | 1197(1) | -5730(1)  | 2639(1) | 36(1)  |
| C(4)   | 2716(2) | -9031(5)  | 4263(2) | 39(1)  |
| C(4B)  | 2543(2) | -12083(8) | 5618(5) | 126(5) |
| C(4A)  | 4045(2) | -6785(5)  | 4407(3) | 53(2)  |
| C(5)   | 2406(2) | -8702(5)  | 3906(3) | 41(2)  |
| C(5B)  | 2481(4) | -12030(9) | 5026(4) | 173(7) |
| C(5A)  | 3997(2) | -6618(6)  | 5048(3) | 49(2)  |
| C(6)   | 2130(2) | -8488(5)  | 3588(3) | 39(1)  |
| C(6B)  | 2222(3) | -12850(8) | 4649(4) | 114(4) |
| C(6A)  | 3631(2) | -6655(6)  | 5115(3) | 58(2)  |
| C(7)   | 1816(2) | -8268(5)  | 3229(2) | 36(1)  |
| C(7B)  | 2269(2) | -12943(8) | 3998(4) | 97(3)  |
| C(7A)  | 3580(2) | -6450(7)  | 5749(3) | 69(2)  |
| C(8)   | 1536(2) | -8075(5)  | 2904(2) | 38(1)  |
| C(8B)  | 2118(2) | -11979(7) | 3617(4) | 86(3)  |
| C(8A)  | 3241(2) | -6504(16) | 5871(4) | 198(8) |
| C(9B)  | 2214(2) | -11883(8) | 2982(4) | 88(3)  |
| C(9A)  | 2955(2) | -6150(13) | 5511(5) | 149(6) |
| C(10B) | 2582(2) | -11442(8) | 3045(4) | 83(3)  |

|        |          |            |          |         |
|--------|----------|------------|----------|---------|
| C(10A) | 2615(3)  | -5930(13)  | 5586(6)  | 147(5)  |
| C(11)  | 4403(1)  | -12163(4)  | 5951(2)  | 24(1)   |
| C(11B) | 2668(3)  | -11297(8)  | 2439(4)  | 98(3)   |
| C(11A) | 2338(4)  | -6448(13)  | 5100(6)  | 186(7)  |
| F(12)  | 4103(1)  | -13952(3)  | 6009(2)  | 44(1)   |
| C(12)  | 4404(1)  | -13336(5)  | 6117(2)  | 29(1)   |
| C(12B) | 3021(3)  | -10736(8)  | 2486(4)  | 92(3)   |
| C(12A) | 2314(7)  | -7455(11)  | 5485(6)  | 480(30) |
| F(13)  | 4676(1)  | -15125(3)  | 6546(2)  | 59(1)   |
| C(13)  | 4692(2)  | -13961(5)  | 6380(2)  | 37(2)   |
| C(13B) | 3072(2)  | -9484(8)   | 2753(4)  | 78(2)   |
| C(13A) | 1982(5)  | -7870(30)  | 5170(11) | 310(20) |
| F(14)  | 5296(1)  | -14019(3)  | 6727(2)  | 63(1)   |
| C(14)  | 5008(2)  | -13420(5)  | 6474(2)  | 42(2)   |
| C(14B) | 2825(2)  | -8550(6)   | 2431(3)  | 69(2)   |
| C(14A) | 1733(10) | -8740(20)  | 5229(12) | 320(20) |
| C(15)  | 5023(2)  | -12236(5)  | 6304(2)  | 33(1)   |
| F(15)  | 5330(1)  | -11676(3)  | 6381(2)  | 50(1)   |
| C(15B) | 2917(2)  | -7297(7)   | 2672(4)  | 76(2)   |
| C(15A) | 1555(4)  | -9860(20)  | 5140(7)  | 228(12) |
| F(16)  | 4763(1)  | -10489(3)  | 5884(1)  | 37(1)   |
| C(16)  | 4723(1)  | -11652(4)  | 6049(2)  | 25(1)   |
| C(16B) | 2703(2)  | -6314(7)   | 2320(4)  | 76(2)   |
| C(16A) | 1220(6)  | -10210(20) | 4984(8)  | 272(12) |
| C(17B) | 2338(2)  | -6358(8)   | 2352(3)  | 78(3)   |
| C(17A) | 980(3)   | -10312(15) | 4416(4)  | 159(6)  |
| C(18B) | 2118(2)  | -5280(7)   | 2034(3)  | 63(2)   |
| C(18A) | 1098(3)  | -10856(11) | 3876(4)  | 123(4)  |
| C(19B) | 1727(2)  | -5427(6)   | 2000(3)  | 48(2)   |
| C(19A) | 948(2)   | -10140(7)  | 3304(3)  | 71(2)   |
| C(20B) | 1625(2)  | -5206(5)   | 2604(3)  | 43(2)   |
| C(20A) | 1099(2)  | -10656(6)  | 2792(3)  | 56(2)   |
| C(21)  | 3688(1)  | -12668(5)  | 4226(2)  | 31(1)   |
| C(22)  | 3668(2)  | -12998(5)  | 3625(2)  | 45(2)   |
| C(23)  | 3428(2)  | -13795(6)  | 3351(3)  | 61(2)   |
| C(24)  | 3203(2)  | -14295(6)  | 3659(3)  | 57(2)   |
| C(25)  | 3216(2)  | -13993(5)  | 4242(3)  | 49(2)   |
| C(26)  | 3461(2)  | -13172(5)  | 4532(2)  | 39(1)   |



|       |         |           |         |        |
|-------|---------|-----------|---------|--------|
| C(31) | 4416(1) | -12278(5) | 4527(2) | 27(1)  |
| C(32) | 4443(2) | -13513(5) | 4506(2) | 36(1)  |
| C(33) | 4752(2) | -14036(5) | 4479(3) | 44(2)  |
| C(34) | 5040(2) | -13345(5) | 4487(3) | 39(1)  |
| C(35) | 5014(2) | -12104(5) | 4510(2) | 38(1)  |
| C(36) | 4703(1) | -11578(5) | 4531(2) | 31(1)  |
| C(41) | 4018(2) | -9344(5)  | 6787(2) | 32(1)  |
| C(42) | 3892(2) | -8705(5)  | 7224(3) | 52(2)  |
| C(43) | 4031(2) | -7591(6)  | 7411(3) | 57(2)  |
| C(44) | 4294(2) | -7122(6)  | 7187(3) | 52(2)  |
| C(45) | 4421(2) | -7753(5)  | 6754(3) | 48(2)  |
| C(46) | 4275(2) | -8848(5)  | 6555(3) | 40(2)  |
| C(51) | 4033(1) | -11854(5) | 7100(2) | 28(1)  |
| C(52) | 3896(2) | -12988(5) | 7102(2) | 35(1)  |
| C(53) | 4064(2) | -13853(5) | 7492(3) | 45(2)  |
| C(54) | 4370(2) | -13603(6) | 7880(3) | 49(2)  |
| C(55) | 4505(2) | -12467(6) | 7893(3) | 48(2)  |
| C(56) | 4339(2) | -11600(5) | 7501(2) | 38(1)  |
| C(61) | 663(2)  | -7285(5)  | 1679(2) | 34(1)  |
| F(62) | 934(1)  | -7626(3)  | 873(2)  | 61(1)  |
| C(62) | 652(2)  | -7319(5)  | 1072(3) | 42(2)  |
| F(63) | 371(1)  | -7115(4)  | 35(2)   | 82(1)  |
| C(63) | 363(2)  | -7064(6)  | 632(3)  | 55(2)  |
| F(64) | -216(1) | -6513(5)  | 371(2)  | 117(2) |
| C(64) | 63(2)   | -6776(7)  | 800(3)  | 69(2)  |
| C(65) | 59(2)   | -6725(8)  | 1397(3) | 68(2)  |
| F(65) | -228(1) | -6424(6)  | 1569(2) | 120(2) |
| F(66) | 330(1)  | -6913(4)  | 2410(2) | 62(1)  |
| C(66) | 358(2)  | -6968(6)  | 1822(3) | 43(2)  |
| C(71) | 608(2)  | -10103(5) | 1638(3) | 38(1)  |
| C(72) | 566(2)  | -10383(5) | 1033(3) | 47(2)  |
| C(73) | 244(2)  | -10604(6) | 684(3)  | 62(2)  |
| C(74) | -41(2)  | -10529(6) | 934(3)  | 55(2)  |
| C(75) | -7(2)   | -10252(6) | 1525(3) | 56(2)  |
| C(76) | 316(2)  | -10038(5) | 1887(3) | 47(2)  |
| C(81) | 1334(2) | -10310(5) | 1700(3) | 42(2)  |
| C(82) | 1573(2) | -9573(7)  | 1540(3) | 56(2)  |
| C(83) | 1818(2) | -10034(8) | 1256(3) | 77(2)  |

|        |         |            |         |        |
|--------|---------|------------|---------|--------|
| C(84)  | 1815(3) | -11231(10) | 1121(4) | 99(3)  |
| C(85)  | 1572(3) | -11984(8)  | 1278(4) | 86(3)  |
| C(86)  | 1333(2) | -11524(6)  | 1567(3) | 61(2)  |
| C(91)  | 892(2)  | -4649(5)   | 2232(3) | 42(2)  |
| C(92)  | 852(2)  | -4568(5)   | 1618(3) | 51(2)  |
| C(93)  | 593(2)  | -3888(6)   | 1267(4) | 67(2)  |
| C(94)  | 371(2)  | -3291(7)   | 1559(5) | 81(3)  |
| C(95)  | 414(2)  | -3347(7)   | 2176(4) | 76(2)  |
| C(96)  | 671(2)  | -4029(5)   | 2508(3) | 55(2)  |
| C(101) | 1176(2) | -5538(6)   | 3427(3) | 46(2)  |
| C(102) | 1002(2) | -6377(6)   | 3701(3) | 52(2)  |
| C(103) | 986(2)  | -6248(7)   | 4305(3) | 65(2)  |
| C(104) | 1139(2) | -5310(10)  | 4637(4) | 85(3)  |
| C(105) | 1308(3) | -4499(10)  | 4377(4) | 107(4) |
| C(106) | 1328(2) | -4567(7)   | 3764(3) | 77(3)  |

---

Table S3. Bond lengths [Å] and angles [°] for **4**.

---

|             |            |
|-------------|------------|
| Pt(1)-C(1)  | 1.978(5)   |
| Pt(1)-C(11) | 2.081(5)   |
| Pt(1)-P(1)  | 2.2947(13) |
| Pt(1)-P(2)  | 2.3031(13) |
| Pt(1)-Pt(2) | 12.781(3)  |
| P(1)-C(31)  | 1.823(6)   |
| P(1)-C(21)  | 1.825(5)   |
| P(1)-C(1A)  | 1.826(5)   |
| C(1B)-C(2B) | 1.510(8)   |
| C(1B)-P(2)  | 1.832(6)   |
| C(1)-C(2)   | 1.222(7)   |
| C(1A)-C(2A) | 1.535(7)   |
| Pt(2)-C(8)  | 1.992(6)   |
| Pt(2)-C(61) | 2.059(5)   |
| Pt(2)-P(3)  | 2.2995(15) |
| Pt(2)-P(4)  | 2.3055(16) |
| P(2)-C(41)  | 1.813(5)   |
| P(2)-C(51)  | 1.815(5)   |
| C(2)-C(3)   | 1.366(7)   |
| C(2B)-C(3B) | 1.522(9)   |
| C(2A)-C(3A) | 1.529(7)   |
| P(3)-C(81)  | 1.817(6)   |
| P(3)-C(71)  | 1.825(6)   |
| P(3)-C(20A) | 1.855(6)   |
| C(3)-C(4)   | 1.193(7)   |
| C(3B)-C(4B) | 1.516(10)  |
| C(3A)-C(4A) | 1.531(8)   |
| P(4)-C(101) | 1.817(6)   |
| P(4)-C(91)  | 1.817(6)   |
| P(4)-C(20B) | 1.822(6)   |
| C(4)-C(5)   | 1.371(8)   |
| C(4B)-C(5B) | 1.310(13)  |
| C(4A)-C(5A) | 1.516(8)   |
| C(5)-C(6)   | 1.203(8)   |
| C(5B)-C(6B) | 1.500(12)  |
| C(5A)-C(6A) | 1.503(9)   |

|               |           |
|---------------|-----------|
| C(6)-C(7)     | 1.358(7)  |
| C(6B)-C(7B)   | 1.529(12) |
| C(6A)-C(7A)   | 1.508(9)  |
| C(7)-C(8)     | 1.216(7)  |
| C(7B)-C(8B)   | 1.427(10) |
| C(7A)-C(8A)   | 1.442(10) |
| C(8B)-C(9B)   | 1.570(11) |
| C(8A)-C(9A)   | 1.309(10) |
| C(9B)-C(10B)  | 1.526(11) |
| C(9A)-C(10A)  | 1.426(11) |
| C(10B)-C(11B) | 1.492(11) |
| C(10A)-C(11A) | 1.495(12) |
| C(11)-C(12)   | 1.359(7)  |
| C(11)-C(16)   | 1.371(7)  |
| C(11B)-C(12B) | 1.526(12) |
| C(11A)-C(12A) | 1.436(12) |
| F(12)-C(12)   | 1.358(6)  |
| C(12)-C(13)   | 1.363(8)  |
| C(12B)-C(13B) | 1.517(11) |
| C(12A)-C(13A) | 1.439(15) |
| F(13)-C(13)   | 1.356(6)  |
| C(13)-C(14)   | 1.374(9)  |
| C(13B)-C(14B) | 1.508(9)  |
| C(13A)-C(14A) | 1.411(15) |
| F(14)-C(14)   | 1.344(6)  |
| C(14)-C(15)   | 1.378(8)  |
| C(14B)-C(15B) | 1.514(9)  |
| C(14A)-C(15A) | 1.433(14) |
| C(15)-F(15)   | 1.349(6)  |
| C(15)-C(16)   | 1.376(7)  |
| C(15B)-C(16B) | 1.506(10) |
| C(15A)-C(16A) | 1.36(2)   |
| F(16)-C(16)   | 1.367(5)  |
| C(16B)-C(17B) | 1.474(10) |
| C(16A)-C(17A) | 1.431(18) |
| C(17B)-C(18B) | 1.568(10) |
| C(17A)-C(18A) | 1.529(15) |
| C(18B)-C(19B) | 1.554(8)  |

|               |           |
|---------------|-----------|
| C(18A)-C(19A) | 1.527(10) |
| C(19B)-C(20B) | 1.528(8)  |
| C(19A)-C(20A) | 1.529(10) |
| C(21)-C(26)   | 1.375(8)  |
| C(21)-C(22)   | 1.394(7)  |
| C(22)-C(23)   | 1.356(8)  |
| C(23)-C(24)   | 1.370(10) |
| C(24)-C(25)   | 1.351(9)  |
| C(25)-C(26)   | 1.395(8)  |
| C(31)-C(32)   | 1.383(7)  |
| C(31)-C(36)   | 1.385(7)  |
| C(32)-C(33)   | 1.377(8)  |
| C(33)-C(34)   | 1.381(8)  |
| C(34)-C(35)   | 1.388(8)  |
| C(35)-C(36)   | 1.380(8)  |
| C(41)-C(46)   | 1.368(8)  |
| C(41)-C(42)   | 1.398(8)  |
| C(42)-C(43)   | 1.388(8)  |
| C(43)-C(44)   | 1.363(10) |
| C(44)-C(45)   | 1.389(9)  |
| C(45)-C(46)   | 1.385(7)  |
| C(51)-C(52)   | 1.376(7)  |
| C(51)-C(56)   | 1.385(7)  |
| C(52)-C(53)   | 1.379(7)  |
| C(53)-C(54)   | 1.369(9)  |
| C(54)-C(55)   | 1.374(8)  |
| C(55)-C(56)   | 1.379(7)  |
| C(61)-C(62)   | 1.365(8)  |
| C(61)-C(66)   | 1.375(8)  |
| F(62)-C(62)   | 1.343(7)  |
| C(62)-C(63)   | 1.381(8)  |
| F(63)-C(63)   | 1.359(7)  |
| C(63)-C(64)   | 1.371(10) |
| F(64)-C(64)   | 1.342(7)  |
| C(64)-C(65)   | 1.358(10) |
| C(65)-F(65)   | 1.330(8)  |
| C(65)-C(66)   | 1.384(8)  |
| F(66)-C(66)   | 1.360(7)  |

|                   |            |
|-------------------|------------|
| C(71)-C(72)       | 1.380(8)   |
| C(71)-C(76)       | 1.402(8)   |
| C(72)-C(73)       | 1.377(8)   |
| C(73)-C(74)       | 1.376(10)  |
| C(74)-C(75)       | 1.350(9)   |
| C(75)-C(76)       | 1.389(8)   |
| C(81)-C(82)       | 1.367(9)   |
| C(81)-C(86)       | 1.386(8)   |
| C(82)-C(83)       | 1.380(10)  |
| C(83)-C(84)       | 1.368(11)  |
| C(84)-C(85)       | 1.386(13)  |
| C(85)-C(86)       | 1.366(11)  |
| C(91)-C(92)       | 1.368(8)   |
| C(91)-C(96)       | 1.372(9)   |
| C(92)-C(93)       | 1.385(9)   |
| C(93)-C(94)       | 1.383(11)  |
| C(94)-C(95)       | 1.372(11)  |
| C(95)-C(96)       | 1.364(10)  |
| C(101)-C(106)     | 1.385(9)   |
| C(101)-C(102)     | 1.390(9)   |
| C(102)-C(103)     | 1.389(9)   |
| C(103)-C(104)     | 1.354(10)  |
| C(104)-C(105)     | 1.337(12)  |
| C(105)-C(106)     | 1.409(10)  |
|                   |            |
| C(1)-Pt(1)-C(11)  | 177.87(19) |
| C(1)-Pt(1)-P(1)   | 85.41(15)  |
| C(11)-Pt(1)-P(1)  | 92.47(13)  |
| C(1)-Pt(1)-P(2)   | 89.21(15)  |
| C(11)-Pt(1)-P(2)  | 92.90(13)  |
| P(1)-Pt(1)-P(2)   | 174.40(5)  |
| C(1)-Pt(1)-Pt(2)  | 12.94(14)  |
| C(11)-Pt(1)-Pt(2) | 165.34(13) |
| P(1)-Pt(1)-Pt(2)  | 76.40(4)   |
| P(2)-Pt(1)-Pt(2)  | 98.03(4)   |
| C(31)-P(1)-C(21)  | 103.8(2)   |
| C(31)-P(1)-C(1A)  | 107.6(2)   |
| C(21)-P(1)-C(1A)  | 104.4(2)   |

|                    |            |
|--------------------|------------|
| C(31)-P(1)-Pt(1)   | 116.37(15) |
| C(21)-P(1)-Pt(1)   | 111.52(19) |
| C(1A)-P(1)-Pt(1)   | 112.20(17) |
| C(2B)-C(1B)-P(2)   | 116.7(4)   |
| C(2)-C(1)-Pt(1)    | 174.4(5)   |
| C(2A)-C(1A)-P(1)   | 115.5(3)   |
| C(8)-Pt(2)-C(61)   | 176.6(2)   |
| C(8)-Pt(2)-P(3)    | 88.98(16)  |
| C(61)-Pt(2)-P(3)   | 90.84(15)  |
| C(8)-Pt(2)-P(4)    | 86.11(17)  |
| C(61)-Pt(2)-P(4)   | 94.26(15)  |
| P(3)-Pt(2)-P(4)    | 174.04(5)  |
| C(8)-Pt(2)-Pt(1)   | 7.41(17)   |
| C(61)-Pt(2)-Pt(1)  | 170.11(16) |
| P(3)-Pt(2)-Pt(1)   | 82.96(4)   |
| P(4)-Pt(2)-Pt(1)   | 92.38(4)   |
| C(41)-P(2)-C(51)   | 105.3(2)   |
| C(41)-P(2)-C(1B)   | 103.7(3)   |
| C(51)-P(2)-C(1B)   | 108.0(3)   |
| C(41)-P(2)-Pt(1)   | 111.55(18) |
| C(51)-P(2)-Pt(1)   | 113.97(17) |
| C(1B)-P(2)-Pt(1)   | 113.57(17) |
| C(1)-C(2)-C(3)     | 176.4(6)   |
| C(1B)-C(2B)-C(3B)  | 110.5(5)   |
| C(3A)-C(2A)-C(1A)  | 112.3(4)   |
| C(81)-P(3)-C(71)   | 104.5(3)   |
| C(81)-P(3)-C(20A)  | 102.0(3)   |
| C(71)-P(3)-C(20A)  | 107.5(3)   |
| C(81)-P(3)-Pt(2)   | 113.8(2)   |
| C(71)-P(3)-Pt(2)   | 114.81(19) |
| C(20A)-P(3)-Pt(2)  | 113.0(2)   |
| C(4)-C(3)-C(2)     | 176.3(7)   |
| C(4B)-C(3B)-C(2B)  | 114.4(7)   |
| C(2A)-C(3A)-C(4A)  | 115.0(5)   |
| C(101)-P(4)-C(91)  | 104.5(3)   |
| C(101)-P(4)-C(20B) | 104.5(3)   |
| C(91)-P(4)-C(20B)  | 107.3(3)   |
| C(101)-P(4)-Pt(2)  | 112.2(2)   |

|                      |            |
|----------------------|------------|
| C(91)-P(4)-Pt(2)     | 114.79(19) |
| C(20B)-P(4)-Pt(2)    | 112.8(2)   |
| C(3)-C(4)-C(5)       | 176.0(7)   |
| C(5B)-C(4B)-C(3B)    | 122.5(9)   |
| C(5A)-C(4A)-C(3A)    | 114.5(5)   |
| C(6)-C(5)-C(4)       | 176.0(7)   |
| C(4B)-C(5B)-C(6B)    | 120.5(10)  |
| C(6A)-C(5A)-C(4A)    | 114.9(6)   |
| C(5)-C(6)-C(7)       | 178.9(7)   |
| C(5B)-C(6B)-C(7B)    | 112.0(9)   |
| C(5A)-C(6A)-C(7A)    | 115.2(6)   |
| C(8)-C(7)-C(6)       | 179.5(7)   |
| C(8B)-C(7B)-C(6B)    | 114.0(9)   |
| C(8A)-C(7A)-C(6A)    | 120.1(7)   |
| C(7)-C(8)-Pt(2)      | 175.0(5)   |
| C(7B)-C(8B)-C(9B)    | 116.8(9)   |
| C(9A)-C(8A)-C(7A)    | 126.5(11)  |
| C(10B)-C(9B)-C(8B)   | 110.9(7)   |
| C(8A)-C(9A)-C(10A)   | 134.4(12)  |
| C(11B)-C(10B)-C(9B)  | 111.0(8)   |
| C(9A)-C(10A)-C(11A)  | 114.6(13)  |
| C(12)-C(11)-C(16)    | 114.1(5)   |
| C(12)-C(11)-Pt(1)    | 123.0(4)   |
| C(16)-C(11)-Pt(1)    | 122.9(4)   |
| C(10B)-C(11B)-C(12B) | 112.0(8)   |
| C(12A)-C(11A)-C(10A) | 89.5(14)   |
| F(12)-C(12)-C(11)    | 119.1(5)   |
| F(12)-C(12)-C(13)    | 116.6(5)   |
| C(11)-C(12)-C(13)    | 124.3(5)   |
| C(13B)-C(12B)-C(11B) | 116.6(8)   |
| C(11A)-C(12A)-C(13A) | 97(2)      |
| F(13)-C(13)-C(12)    | 121.7(6)   |
| F(13)-C(13)-C(14)    | 118.2(5)   |
| C(12)-C(13)-C(14)    | 120.1(5)   |
| C(14B)-C(13B)-C(12B) | 115.1(7)   |
| C(14A)-C(13A)-C(12A) | 140(4)     |
| F(14)-C(14)-C(13)    | 121.4(5)   |
| F(14)-C(14)-C(15)    | 120.5(6)   |



|                      |           |
|----------------------|-----------|
| C(13)-C(14)-C(15)    | 118.1(5)  |
| C(13B)-C(14B)-C(15B) | 112.3(7)  |
| C(13A)-C(14A)-C(15A) | 157(3)    |
| F(15)-C(15)-C(16)    | 121.1(5)  |
| F(15)-C(15)-C(14)    | 120.0(5)  |
| C(16)-C(15)-C(14)    | 118.9(5)  |
| C(16B)-C(15B)-C(14B) | 114.5(7)  |
| C(16A)-C(15A)-C(14A) | 136(3)    |
| F(16)-C(16)-C(11)    | 120.6(4)  |
| F(16)-C(16)-C(15)    | 114.9(5)  |
| C(11)-C(16)-C(15)    | 124.5(5)  |
| C(17B)-C(16B)-C(15B) | 113.7(7)  |
| C(15A)-C(16A)-C(17A) | 133(2)    |
| C(16B)-C(17B)-C(18B) | 114.4(7)  |
| C(16A)-C(17A)-C(18A) | 119.1(13) |
| C(19B)-C(18B)-C(17B) | 113.5(6)  |
| C(19A)-C(18A)-C(17A) | 109.9(10) |
| C(20B)-C(19B)-C(18B) | 113.5(5)  |
| C(18A)-C(19A)-C(20A) | 107.5(7)  |
| C(19B)-C(20B)-P(4)   | 115.0(4)  |
| C(19A)-C(20A)-P(3)   | 113.8(5)  |
| C(26)-C(21)-C(22)    | 118.7(5)  |
| C(26)-C(21)-P(1)     | 120.2(4)  |
| C(22)-C(21)-P(1)     | 121.1(5)  |
| C(23)-C(22)-C(21)    | 120.2(6)  |
| C(22)-C(23)-C(24)    | 120.7(6)  |
| C(25)-C(24)-C(23)    | 120.4(6)  |
| C(24)-C(25)-C(26)    | 119.9(6)  |
| C(21)-C(26)-C(25)    | 120.1(5)  |
| C(32)-C(31)-C(36)    | 119.3(5)  |
| C(32)-C(31)-P(1)     | 119.3(4)  |
| C(36)-C(31)-P(1)     | 121.2(4)  |
| C(33)-C(32)-C(31)    | 120.1(6)  |
| C(32)-C(33)-C(34)    | 121.0(6)  |
| C(33)-C(34)-C(35)    | 119.1(6)  |
| C(36)-C(35)-C(34)    | 120.0(6)  |
| C(35)-C(36)-C(31)    | 120.6(5)  |
| C(46)-C(41)-C(42)    | 118.8(5)  |

|                   |          |
|-------------------|----------|
| C(46)-C(41)-P(2)  | 119.2(4) |
| C(42)-C(41)-P(2)  | 122.0(5) |
| C(43)-C(42)-C(41) | 119.4(6) |
| C(44)-C(43)-C(42) | 121.2(6) |
| C(43)-C(44)-C(45) | 119.9(6) |
| C(46)-C(45)-C(44) | 118.9(6) |
| C(41)-C(46)-C(45) | 121.9(6) |
| C(52)-C(51)-C(56) | 118.6(5) |
| C(52)-C(51)-P(2)  | 120.0(4) |
| C(56)-C(51)-P(2)  | 120.9(4) |
| C(51)-C(52)-C(53) | 120.4(6) |
| C(54)-C(53)-C(52) | 120.7(6) |
| C(53)-C(54)-C(55) | 119.5(6) |
| C(54)-C(55)-C(56) | 120.0(6) |
| C(55)-C(56)-C(51) | 120.7(6) |
| C(62)-C(61)-C(66) | 114.1(5) |
| C(62)-C(61)-Pt(2) | 122.8(5) |
| C(66)-C(61)-Pt(2) | 123.1(4) |
| F(62)-C(62)-C(61) | 119.9(5) |
| F(62)-C(62)-C(63) | 116.1(6) |
| C(61)-C(62)-C(63) | 124.0(6) |
| F(63)-C(63)-C(64) | 119.7(6) |
| F(63)-C(63)-C(62) | 120.9(7) |
| C(64)-C(63)-C(62) | 119.4(6) |
| F(64)-C(64)-C(65) | 121.6(7) |
| F(64)-C(64)-C(63) | 119.2(7) |
| C(65)-C(64)-C(63) | 119.1(6) |
| F(65)-C(65)-C(64) | 119.9(6) |
| F(65)-C(65)-C(66) | 120.8(7) |
| C(64)-C(65)-C(66) | 119.3(7) |
| F(66)-C(66)-C(61) | 120.5(5) |
| F(66)-C(66)-C(65) | 115.4(6) |
| C(61)-C(66)-C(65) | 124.0(6) |
| C(72)-C(71)-C(76) | 118.5(5) |
| C(72)-C(71)-P(3)  | 121.9(5) |
| C(76)-C(71)-P(3)  | 119.3(5) |
| C(73)-C(72)-C(71) | 120.4(7) |
| C(74)-C(73)-C(72) | 120.4(7) |

|                      |          |
|----------------------|----------|
| C(75)-C(74)-C(73)    | 120.4(6) |
| C(74)-C(75)-C(76)    | 120.2(7) |
| C(75)-C(76)-C(71)    | 120.0(6) |
| C(82)-C(81)-C(86)    | 119.9(7) |
| C(82)-C(81)-P(3)     | 119.8(5) |
| C(86)-C(81)-P(3)     | 120.3(6) |
| C(81)-C(82)-C(83)    | 120.4(7) |
| C(84)-C(83)-C(82)    | 119.5(9) |
| C(83)-C(84)-C(85)    | 120.4(9) |
| C(86)-C(85)-C(84)    | 119.7(8) |
| C(85)-C(86)-C(81)    | 120.0(8) |
| C(92)-C(91)-C(96)    | 119.2(6) |
| C(92)-C(91)-P(4)     | 118.4(5) |
| C(96)-C(91)-P(4)     | 121.9(5) |
| C(91)-C(92)-C(93)    | 121.6(7) |
| C(94)-C(93)-C(92)    | 117.8(8) |
| C(95)-C(94)-C(93)    | 120.8(8) |
| C(96)-C(95)-C(94)    | 120.0(8) |
| C(95)-C(96)-C(91)    | 120.6(8) |
| C(106)-C(101)-C(102) | 118.8(6) |
| C(106)-C(101)-P(4)   | 121.7(5) |
| C(102)-C(101)-P(4)   | 119.5(5) |
| C(103)-C(102)-C(101) | 120.2(7) |
| C(104)-C(103)-C(102) | 121.0(8) |
| C(105)-C(104)-C(103) | 119.2(8) |
| C(104)-C(105)-C(106) | 122.5(8) |
| C(101)-C(106)-C(105) | 118.2(8) |

---

Table S4. Anisotropic displacement parameters ( $\text{\AA}^2 \times 10^3$ ) for **4**. The anisotropic displacement factor exponent takes the form:  $-2\pi^2[h^2a^*2U^{11} + \dots + 2hka^*b^*U^{12}]$

|        | U <sup>11</sup> | U <sup>22</sup> | U <sup>33</sup> | U <sup>23</sup> | U <sup>13</sup> | U <sup>12</sup> |
|--------|-----------------|-----------------|-----------------|-----------------|-----------------|-----------------|
| Pt(1)  | 22(1)           | 31(1)           | 18(1)           | 0(1)            | 3(1)            | 0(1)            |
| P(1)   | 28(1)           | 32(1)           | 19(1)           | -2(1)           | 4(1)            | -3(1)           |
| C(1B)  | 26(3)           | 65(4)           | 29(3)           | 3(3)            | 9(2)            | 2(3)            |
| C(1)   | 28(3)           | 37(3)           | 24(2)           | 1(2)            | 7(2)            | -5(3)           |
| C(1A)  | 36(3)           | 48(4)           | 22(2)           | 4(2)            | 6(2)            | 8(3)            |
| Pt(2)  | 22(1)           | 35(1)           | 34(1)           | 3(1)            | 1(1)            | 1(1)            |
| P(2)   | 27(1)           | 34(1)           | 19(1)           | 1(1)            | 6(1)            | 1(1)            |
| C(2)   | 33(3)           | 44(4)           | 26(3)           | 6(2)            | 8(2)            | -1(3)           |
| C(2B)  | 27(3)           | 66(4)           | 48(3)           | 9(3)            | 12(3)           | 2(3)            |
| C(2A)  | 36(3)           | 35(3)           | 25(3)           | 4(2)            | 9(2)            | 2(3)            |
| P(3)   | 27(1)           | 35(1)           | 45(1)           | 5(1)            | 2(1)            | -1(1)           |
| C(3)   | 30(3)           | 44(4)           | 27(3)           | 0(2)            | 5(2)            | 7(3)            |
| C(3B)  | 41(4)           | 82(6)           | 85(5)           | 24(4)           | 0(4)            | -18(4)          |
| C(3A)  | 62(5)           | 36(3)           | 32(3)           | 8(3)            | 7(3)            | 4(3)            |
| P(4)   | 30(1)           | 40(1)           | 38(1)           | -1(1)           | 6(1)            | 1(1)            |
| C(4)   | 33(3)           | 47(4)           | 38(3)           | 5(3)            | 9(3)            | 2(3)            |
| C(4B)  | 61(6)           | 100(7)          | 183(12)         | 56(8)           | -49(7)          | -45(6)          |
| C(4A)  | 72(5)           | 37(4)           | 54(4)           | 9(3)            | 23(4)           | 4(4)            |
| C(5)   | 30(3)           | 48(4)           | 44(3)           | 3(3)            | 5(3)            | 0(3)            |
| C(5B)  | 330(20)         | 90(7)           | 67(6)           | 2(6)            | -18(9)          | -98(10)         |
| C(5A)  | 56(5)           | 35(4)           | 60(4)           | -7(3)           | 21(3)           | -9(3)           |
| C(6)   | 31(3)           | 44(4)           | 38(3)           | 2(3)            | 1(3)            | 2(3)            |
| C(6B)  | 150(11)         | 100(7)          | 89(7)           | 2(6)            | 17(7)           | -60(7)          |
| C(6A)  | 61(5)           | 61(4)           | 54(4)           | 4(3)            | 17(4)           | 14(4)           |
| C(7)   | 27(3)           | 40(3)           | 39(3)           | 5(3)            | 3(3)            | 3(3)            |
| C(7B)  | 74(7)           | 99(7)           | 106(8)          | -1(6)           | -9(6)           | -14(6)          |
| C(7A)  | 60(5)           | 92(6)           | 56(4)           | -15(4)          | 17(4)           | -7(5)           |
| C(8)   | 38(4)           | 34(3)           | 40(3)           | 5(3)            | 7(3)            | 1(3)            |
| C(8B)  | 74(6)           | 74(6)           | 106(7)          | 13(5)           | 12(5)           | -13(5)          |
| C(8A)  | 68(7)           | 460(20)         | 67(6)           | -13(10)         | 19(6)           | 103(12)         |
| C(9B)  | 97(8)           | 78(6)           | 77(6)           | -8(5)           | -9(5)           | -12(6)          |
| C(9A)  | 53(6)           | 257(16)         | 148(11)         | 86(10)          | 49(7)           | 33(8)           |
| C(10B) | 85(7)           | 88(6)           | 75(6)           | -10(5)          | 16(5)           | 20(5)           |

|        |          |         |         |          |         |         |
|--------|----------|---------|---------|----------|---------|---------|
| C(10A) | 96(10)   | 223(15) | 111(9)  | -24(9)   | -2(8)   | 42(10)  |
| C(11)  | 26(3)    | 27(3)   | 20(2)   | -1(2)    | 6(2)    | 3(2)    |
| C(11B) | 138(10)  | 79(6)   | 80(6)   | -20(5)   | 25(6)   | 23(7)   |
| C(11A) | 230(20)  | 190(15) | 138(13) | -18(11)  | 39(13)  | 46(14)  |
| F(12)  | 48(2)    | 34(2)   | 52(2)   | -6(2)    | 15(2)   | -11(2)  |
| C(12)  | 26(3)    | 33(3)   | 28(3)   | -4(2)    | 9(2)    | -7(3)   |
| C(12B) | 117(9)   | 79(6)   | 86(6)   | 3(5)     | 37(6)   | 30(6)   |
| C(12A) | 1290(90) | 86(11)  | 88(11)  | 34(9)    | 180(30) | 210(30) |
| F(13)  | 85(3)    | 23(2)   | 71(2)   | 12(2)    | 24(2)   | 12(2)   |
| C(13)  | 57(4)    | 26(3)   | 32(3)   | 3(2)     | 18(3)   | 12(3)   |
| C(13B) | 63(6)    | 103(7)  | 73(5)   | 10(5)    | 28(4)   | 16(5)   |
| C(13A) | 122(16)  | 680(70) | 145(17) | -160(30) | 53(13)  | 60(30)  |
| F(14)  | 58(3)    | 58(2)   | 65(2)   | 12(2)    | -2(2)   | 32(2)   |
| C(14)  | 45(4)    | 45(4)   | 32(3)   | 10(3)    | 2(3)    | 14(3)   |
| C(14B) | 75(6)    | 76(6)   | 56(4)   | 1(4)     | 16(4)   | 26(5)   |
| C(14A) | 540(60)  | 270(30) | 159(18) | -118(17) | 120(30) | -40(30) |
| C(15)  | 29(3)    | 40(3)   | 28(3)   | 2(2)     | 6(2)    | -1(3)   |
| F(15)  | 26(2)    | 65(2)   | 58(2)   | 3(2)     | 3(2)    | -2(2)   |
| C(15B) | 83(7)    | 85(6)   | 64(5)   | 2(4)     | 24(5)   | 10(5)   |
| C(15A) | 83(10)   | 480(40) | 101(10) | 80(17)   | -35(8)  | 39(17)  |
| F(16)  | 31(2)    | 35(2)   | 44(2)   | 7(1)     | 9(1)    | -4(2)   |
| C(16)  | 32(3)    | 19(3)   | 25(2)   | 5(2)     | 8(2)    | 3(2)    |
| C(16B) | 52(5)    | 103(7)  | 74(5)   | -7(5)    | 16(4)   | 1(5)    |
| C(16A) | 230(20)  | 410(30) | 145(15) | -58(18)  | -25(15) | 130(20) |
| C(17B) | 45(5)    | 120(7)  | 65(5)   | 27(5)    | 4(4)    | -5(5)   |
| C(17A) | 83(8)    | 336(19) | 60(6)   | 38(9)    | 16(6)   | -28(10) |
| C(18B) | 60(5)    | 82(5)   | 54(4)   | -8(4)    | 27(4)   | -20(4)  |
| C(18A) | 95(8)    | 216(12) | 58(5)   | 54(7)    | 16(5)   | 19(8)   |
| C(19B) | 46(4)    | 53(4)   | 46(4)   | 7(3)     | 15(3)   | -5(3)   |
| C(19A) | 61(5)    | 101(6)  | 54(4)   | 27(4)    | 17(4)   | -12(5)  |
| C(20B) | 35(3)    | 41(4)   | 53(4)   | -6(3)    | 10(3)   | -7(3)   |
| C(20A) | 57(5)    | 58(4)   | 47(4)   | 19(3)    | 2(3)    | 0(4)    |
| C(21)  | 31(3)    | 33(3)   | 26(3)   | -1(2)    | 0(2)    | 0(3)    |
| C(22)  | 56(4)    | 47(4)   | 31(3)   | -9(3)    | 10(3)   | -10(3)  |
| C(23)  | 73(5)    | 68(5)   | 36(3)   | -23(3)   | -2(3)   | -18(4)  |
| C(24)  | 59(5)    | 47(4)   | 55(4)   | -15(3)   | -8(4)   | -16(4)  |
| C(25)  | 45(4)    | 51(4)   | 50(4)   | -1(3)    | 8(3)    | -16(3)  |
| C(26)  | 41(4)    | 40(3)   | 35(3)   | -2(3)    | 7(3)    | -14(3)  |

|       |       |        |       |        |        |       |
|-------|-------|--------|-------|--------|--------|-------|
| C(31) | 32(3) | 32(3)  | 15(2) | -2(2)  | 1(2)   | 1(3)  |
| C(32) | 29(3) | 37(4)  | 43(3) | 2(3)   | 8(3)   | -4(3) |
| C(33) | 49(4) | 35(4)  | 46(3) | 8(3)   | 8(3)   | 5(3)  |
| C(34) | 31(3) | 38(4)  | 48(3) | 4(3)   | 11(3)  | 10(3) |
| C(35) | 32(3) | 48(4)  | 35(3) | 3(3)   | 9(2)   | -4(3) |
| C(36) | 32(3) | 30(3)  | 31(3) | -1(2)  | 8(2)   | 0(3)  |
| C(41) | 43(4) | 27(3)  | 25(3) | 1(2)   | 7(2)   | 2(3)  |
| C(42) | 79(5) | 46(4)  | 41(3) | -5(3)  | 33(3)  | -9(4) |
| C(43) | 89(6) | 45(4)  | 44(4) | -12(3) | 31(4)  | -4(4) |
| C(44) | 70(5) | 34(4)  | 49(4) | -11(3) | 9(4)   | -4(4) |
| C(45) | 58(5) | 36(4)  | 51(4) | -5(3)  | 16(3)  | -6(3) |
| C(46) | 49(4) | 33(3)  | 45(3) | -6(3)  | 23(3)  | 1(3)  |
| C(51) | 34(3) | 29(3)  | 23(2) | 0(2)   | 8(2)   | 1(3)  |
| C(52) | 41(4) | 38(3)  | 29(3) | 4(2)   | 11(2)  | 2(3)  |
| C(53) | 58(4) | 35(4)  | 46(3) | 7(3)   | 24(3)  | 8(3)  |
| C(54) | 59(5) | 60(5)  | 33(3) | 15(3)  | 20(3)  | 32(4) |
| C(55) | 43(4) | 60(5)  | 36(3) | 4(3)   | -2(3)  | 5(3)  |
| C(56) | 41(4) | 39(3)  | 33(3) | 1(3)   | 4(3)   | -2(3) |
| C(61) | 28(3) | 31(3)  | 39(3) | 0(2)   | 0(2)   | 2(3)  |
| F(62) | 52(3) | 90(3)  | 43(2) | 7(2)   | 12(2)  | 18(2) |
| C(62) | 38(4) | 43(4)  | 41(3) | 0(3)   | 2(3)   | 13(3) |
| F(63) | 88(4) | 118(4) | 33(2) | -4(2)  | -4(2)  | 30(3) |
| C(63) | 62(5) | 59(4)  | 39(3) | -1(3)  | -1(3)  | 15(4) |
| F(64) | 66(3) | 203(6) | 64(3) | -5(3)  | -26(2) | 62(4) |
| C(64) | 50(5) | 92(6)  | 51(4) | -4(4)  | -17(4) | 33(5) |
| C(65) | 31(4) | 104(6) | 66(5) | 3(4)   | 5(3)   | 34(4) |
| F(65) | 42(3) | 226(6) | 88(3) | 3(4)   | 8(2)   | 61(4) |
| F(66) | 40(2) | 101(3) | 45(2) | 3(2)   | 10(2)  | 17(2) |
| C(66) | 33(3) | 52(4)  | 41(3) | -1(3)  | 4(3)   | 4(3)  |
| C(71) | 31(3) | 32(3)  | 48(3) | 5(3)   | 0(3)   | 2(3)  |
| C(72) | 39(4) | 53(4)  | 46(3) | 11(3)  | 5(3)   | -3(3) |
| C(73) | 50(5) | 72(5)  | 52(4) | 11(4)  | -12(3) | -9(4) |
| C(74) | 32(4) | 53(4)  | 72(5) | 10(4)  | -9(3)  | -4(3) |
| C(75) | 29(4) | 54(4)  | 83(5) | -3(4)  | 7(3)   | -3(3) |
| C(76) | 41(4) | 41(4)  | 58(4) | 0(3)   | 8(3)   | -3(3) |
| C(81) | 33(3) | 41(4)  | 47(3) | 0(3)   | 0(3)   | 6(3)  |
| C(82) | 43(4) | 64(5)  | 64(4) | 0(4)   | 20(3)  | 5(4)  |
| C(83) | 66(6) | 97(7)  | 79(5) | -11(5) | 36(4)  | 2(5)  |

|        |        |        |        |        |       |        |
|--------|--------|--------|--------|--------|-------|--------|
| C(84)  | 96(8)  | 127(9) | 74(6)  | -33(6) | 18(6) | 44(7)  |
| C(85)  | 91(8)  | 62(6)  | 102(7) | -30(5) | 13(6) | 23(6)  |
| C(86)  | 57(5)  | 42(4)  | 79(5)  | -6(4)  | 3(4)  | 10(4)  |
| C(91)  | 40(4)  | 31(3)  | 52(4)  | -1(3)  | 6(3)  | -4(3)  |
| C(92)  | 50(4)  | 38(4)  | 61(4)  | 9(3)   | 8(3)  | -2(3)  |
| C(93)  | 61(5)  | 50(5)  | 81(5)  | 19(4)  | -7(4) | -10(4) |
| C(94)  | 54(5)  | 44(5)  | 138(8) | 36(5)  | 5(6)  | 6(4)   |
| C(95)  | 69(6)  | 52(5)  | 109(7) | 5(5)   | 24(5) | 14(4)  |
| C(96)  | 47(4)  | 37(4)  | 84(5)  | 4(3)   | 21(4) | 6(3)   |
| C(101) | 37(4)  | 63(4)  | 38(3)  | -6(3)  | 8(3)  | 4(3)   |
| C(102) | 42(4)  | 58(4)  | 57(4)  | 1(3)   | 14(3) | 9(4)   |
| C(103) | 59(5)  | 90(6)  | 55(4)  | 12(4)  | 30(4) | 20(5)  |
| C(104) | 67(6)  | 146(9) | 48(4)  | -11(5) | 22(4) | 3(6)   |
| C(105) | 111(9) | 150(9) | 66(6)  | -57(6) | 29(6) | -35(8) |
| C(106) | 83(6)  | 94(6)  | 61(5)  | -35(4) | 30(4) | -40(5) |

Table S5. Hydrogen coordinates ( $\times 10^4$ ) and isotropic displacement parameters ( $\text{\AA}^2 \times 10^3$ ) for **4**.

|        | x    | y      | z    | U(eq) |
|--------|------|--------|------|-------|
| H(1BA) | 3361 | -10634 | 6930 | 47    |
| H(1BB) | 3304 | -9891  | 6314 | 47    |
| H(1AA) | 4045 | -10400 | 3778 | 42    |
| H(1AB) | 3691 | -10163 | 3979 | 42    |
| H(2BA) | 3173 | -12361 | 6452 | 56    |
| H(2BB) | 3233 | -11886 | 5814 | 56    |
| H(2AA) | 4056 | -9097  | 4866 | 38    |
| H(2AB) | 4336 | -9059  | 4457 | 38    |
| H(3BA) | 2703 | -11092 | 6395 | 86    |
| H(3BB) | 2778 | -10441 | 5808 | 86    |
| H(3AA) | 3664 | -8038  | 4100 | 52    |
| H(3AB) | 3945 | -7994  | 3696 | 52    |
| H(4BA) | 2628 | -12903 | 5733 | 151   |
| H(4BB) | 2318 | -12009 | 5733 | 151   |
| H(4AA) | 4292 | -6715  | 4408 | 64    |
| H(4AB) | 3924 | -6128  | 4153 | 64    |
| H(5BA) | 2702 | -12166 | 4905 | 207   |
| H(5BB) | 2410 | -11197 | 4908 | 207   |
| H(5AA) | 4128 | -7253  | 5306 | 59    |
| H(5AB) | 4098 | -5836  | 5202 | 59    |
| H(6BA) | 1988 | -12547 | 4645 | 137   |
| H(6BB) | 2243 | -13659 | 4834 | 137   |
| H(6AA) | 3533 | -7447  | 4974 | 69    |
| H(6AB) | 3499 | -6038  | 4847 | 69    |
| H(7BA) | 2518 | -12970 | 4005 | 116   |
| H(7BB) | 2167 | -13708 | 3821 | 116   |
| H(7AA) | 3723 | -7047  | 6014 | 83    |
| H(7AB) | 3676 | -5649  | 5879 | 83    |
| H(8BA) | 2185 | -11217 | 3837 | 104   |
| H(8BB) | 1866 | -12051 | 3552 | 104   |
| H(9BA) | 2189 | -12680 | 2784 | 106   |
| H(9BB) | 2054 | -11321 | 2722 | 106   |
| H(10A) | 2610 | -10663 | 3260 | 100   |



|        |      |        |      |     |
|--------|------|--------|------|-----|
| H(10B) | 2742 | -12024 | 3288 | 100 |
| H(11A) | 2492 | -10784 | 2182 | 118 |
| H(11B) | 2662 | -12093 | 2242 | 118 |
| H(12A) | 3194 | -11272 | 2734 | 110 |
| H(12B) | 3069 | -10711 | 2075 | 110 |
| H(13A) | 3052 | -9522  | 3180 | 93  |
| H(13B) | 3309 | -9220  | 2751 | 93  |
| H(14A) | 2591 | -8749  | 2478 | 82  |
| H(14B) | 2825 | -8568  | 1993 | 82  |
| H(15A) | 2892 | -7262  | 3097 | 91  |
| H(15B) | 3161 | -7144  | 2672 | 91  |
| H(16A) | 2799 | -5529  | 2476 | 91  |
| H(16B) | 2719 | -6371  | 1891 | 91  |
| H(17A) | 2324 | -6375  | 2783 | 93  |
| H(17B) | 2238 | -7115  | 2164 | 93  |
| H(18A) | 2198 | -4533  | 2257 | 76  |
| H(18B) | 2156 | -5195  | 1619 | 76  |
| H(19A) | 1600 | -4859  | 1696 | 57  |
| H(19B) | 1657 | -6250  | 1861 | 57  |
| H(20A) | 1638 | -4334  | 2688 | 51  |
| H(20B) | 1794 | -5608  | 2928 | 51  |
| H(22A) | 3824 | -12662 | 3408 | 54  |
| H(23A) | 3415 | -14010 | 2940 | 73  |
| H(24A) | 3036 | -14857 | 3462 | 68  |
| H(25A) | 3058 | -14339 | 4453 | 59  |
| H(26A) | 3471 | -12962 | 4942 | 46  |
| H(32A) | 4248 | -14001 | 4510 | 44  |
| H(33A) | 4767 | -14885 | 4454 | 52  |
| H(34A) | 5254 | -13713 | 4478 | 46  |
| H(35A) | 5209 | -11617 | 4510 | 45  |
| H(36A) | 4687 | -10729 | 4549 | 37  |
| H(42A) | 3713 | -9030  | 7392 | 63  |
| H(43A) | 3942 | -7147  | 7701 | 68  |
| H(44A) | 4389 | -6366  | 7326 | 62  |
| H(45A) | 4605 | -7437  | 6596 | 57  |
| H(46A) | 4356 | -9268  | 6248 | 48  |
| H(52A) | 3685 | -13176 | 6832 | 42  |
| H(53A) | 3966 | -14630 | 7492 | 53  |

|        |      |        |      |     |
|--------|------|--------|------|-----|
| H(54A) | 4488 | -14211 | 8138 | 59  |
| H(55A) | 4713 | -12278 | 8172 | 58  |
| H(56A) | 4436 | -10821 | 7507 | 46  |
| H(72A) | 761  | -10424 | 855  | 56  |
| H(73A) | 217  | -10809 | 270  | 74  |
| H(74A) | -262 | -10672 | 689  | 66  |
| H(75A) | -204 | -10204 | 1694 | 67  |
| H(76A) | 339  | -9848  | 2303 | 57  |
| H(82A) | 1571 | -8738  | 1624 | 67  |
| H(83A) | 1988 | -9523  | 1156 | 93  |
| H(84A) | 1980 | -11549 | 918  | 119 |
| H(85A) | 1571 | -12816 | 1186 | 103 |
| H(86A) | 1166 | -12037 | 1676 | 73  |
| H(92A) | 1007 | -4989  | 1427 | 61  |
| H(93A) | 568  | -3834  | 841  | 81  |
| H(94A) | 187  | -2836  | 1328 | 97  |
| H(95A) | 265  | -2910  | 2372 | 91  |
| H(96A) | 698  | -4077  | 2935 | 66  |
| H(10C) | 893  | -7041  | 3474 | 62  |
| H(10D) | 866  | -6827  | 4487 | 78  |
| H(10E) | 1127 | -5229  | 5049 | 102 |
| H(10F) | 1418 | -3851  | 4615 | 129 |
| H(10G) | 1443 | -3963  | 3587 | 92  |

---

Table S6. Torsion angles [°] for **4**.

---

|                         |            |
|-------------------------|------------|
| C(1)-Pt(1)-P(1)-C(31)   | 170.8(2)   |
| C(11)-Pt(1)-P(1)-C(31)  | -9.4(2)    |
| P(2)-Pt(1)-P(1)-C(31)   | -173.2(5)  |
| Pt(2)-Pt(1)-P(1)-C(31)  | -179.8(2)  |
| C(1)-Pt(1)-P(1)-C(21)   | -70.4(2)   |
| C(11)-Pt(1)-P(1)-C(21)  | 109.3(2)   |
| P(2)-Pt(1)-P(1)-C(21)   | -54.4(6)   |
| Pt(2)-Pt(1)-P(1)-C(21)  | -61.02(18) |
| C(1)-Pt(1)-P(1)-C(1A)   | 46.3(2)    |
| C(11)-Pt(1)-P(1)-C(1A)  | -133.9(2)  |
| P(2)-Pt(1)-P(1)-C(1A)   | 62.3(6)    |
| Pt(2)-Pt(1)-P(1)-C(1A)  | 55.7(2)    |
| C(11)-Pt(1)-C(1)-C(2)   | 9(9)       |
| P(1)-Pt(1)-C(1)-C(2)    | 15(5)      |
| P(2)-Pt(1)-C(1)-C(2)    | -163(5)    |
| Pt(2)-Pt(1)-C(1)-C(2)   | -30(5)     |
| C(31)-P(1)-C(1A)-C(2A)  | -90.6(4)   |
| C(21)-P(1)-C(1A)-C(2A)  | 159.6(4)   |
| Pt(1)-P(1)-C(1A)-C(2A)  | 38.7(5)    |
| C(1)-Pt(1)-Pt(2)-C(8)   | -15.8(15)  |
| C(11)-Pt(1)-Pt(2)-C(8)  | 169.5(14)  |
| P(1)-Pt(1)-Pt(2)-C(8)   | -149.1(13) |
| P(2)-Pt(1)-Pt(2)-C(8)   | 31.6(13)   |
| C(1)-Pt(1)-Pt(2)-C(61)  | 148.5(11)  |
| C(11)-Pt(1)-Pt(2)-C(61) | -26.2(11)  |
| P(1)-Pt(1)-Pt(2)-C(61)  | 15.3(9)    |
| P(2)-Pt(1)-Pt(2)-C(61)  | -164.0(9)  |
| C(1)-Pt(1)-Pt(2)-P(3)   | -159.9(7)  |
| C(11)-Pt(1)-Pt(2)-P(3)  | 25.4(6)    |
| P(1)-Pt(1)-Pt(2)-P(3)   | 66.87(6)   |
| P(2)-Pt(1)-Pt(2)-P(3)   | -112.48(6) |
| C(1)-Pt(1)-Pt(2)-P(4)   | 16.4(7)    |
| C(11)-Pt(1)-Pt(2)-P(4)  | -158.3(6)  |
| P(1)-Pt(1)-Pt(2)-P(4)   | -116.86(5) |
| P(2)-Pt(1)-Pt(2)-P(4)   | 63.79(5)   |
| C(2B)-C(1B)-P(2)-C(41)  | 168.7(4)   |

|                         |            |
|-------------------------|------------|
| C(2B)-C(1B)-P(2)-C(51)  | -80.0(5)   |
| C(2B)-C(1B)-P(2)-Pt(1)  | 47.4(5)    |
| C(1)-Pt(1)-P(2)-C(41)   | -86.5(2)   |
| C(11)-Pt(1)-P(2)-C(41)  | 93.8(2)    |
| P(1)-Pt(1)-P(2)-C(41)   | -102.5(5)  |
| Pt(2)-Pt(1)-P(2)-C(41)  | -96.00(19) |
| C(1)-Pt(1)-P(2)-C(51)   | 154.5(2)   |
| C(11)-Pt(1)-P(2)-C(51)  | -25.2(2)   |
| P(1)-Pt(1)-P(2)-C(51)   | 138.5(5)   |
| Pt(2)-Pt(1)-P(2)-C(51)  | 145.0(2)   |
| C(1)-Pt(1)-P(2)-C(1B)   | 30.3(3)    |
| C(11)-Pt(1)-P(2)-C(1B)  | -149.4(3)  |
| P(1)-Pt(1)-P(2)-C(1B)   | 14.3(6)    |
| Pt(2)-Pt(1)-P(2)-C(1B)  | 20.8(2)    |
| Pt(1)-C(1)-C(2)-C(3)    | 36(14)     |
| P(2)-C(1B)-C(2B)-C(3B)  | -159.7(5)  |
| P(1)-C(1A)-C(2A)-C(3A)  | -158.9(4)  |
| C(8)-Pt(2)-P(3)-C(81)   | -68.8(3)   |
| C(61)-Pt(2)-P(3)-C(81)  | 107.8(3)   |
| P(4)-Pt(2)-P(3)-C(81)   | -103.2(6)  |
| Pt(1)-Pt(2)-P(3)-C(81)  | -64.4(2)   |
| C(8)-Pt(2)-P(3)-C(71)   | 170.9(3)   |
| C(61)-Pt(2)-P(3)-C(71)  | -12.5(3)   |
| P(4)-Pt(2)-P(3)-C(71)   | 136.4(6)   |
| Pt(1)-Pt(2)-P(3)-C(71)  | 175.2(2)   |
| C(8)-Pt(2)-P(3)-C(20A)  | 47.0(3)    |
| C(61)-Pt(2)-P(3)-C(20A) | -136.4(3)  |
| P(4)-Pt(2)-P(3)-C(20A)  | 12.6(7)    |
| Pt(1)-Pt(2)-P(3)-C(20A) | 51.4(3)    |
| C(1)-C(2)-C(3)-C(4)     | 7(18)      |
| C(1B)-C(2B)-C(3B)-C(4B) | 171.8(7)   |
| C(1A)-C(2A)-C(3A)-C(4A) | 179.5(5)   |
| C(8)-Pt(2)-P(4)-C(101)  | -65.8(3)   |
| C(61)-Pt(2)-P(4)-C(101) | 117.6(3)   |
| P(3)-Pt(2)-P(4)-C(101)  | -31.3(6)   |
| Pt(1)-Pt(2)-P(4)-C(101) | -69.8(2)   |
| C(8)-Pt(2)-P(4)-C(91)   | 175.0(3)   |
| C(61)-Pt(2)-P(4)-C(91)  | -1.6(3)    |

|                            |            |
|----------------------------|------------|
| P(3)-Pt(2)-P(4)-C(91)      | -150.4(6)  |
| Pt(1)-Pt(2)-P(4)-C(91)     | 171.1(2)   |
| C(8)-Pt(2)-P(4)-C(20B)     | 51.8(3)    |
| C(61)-Pt(2)-P(4)-C(20B)    | -124.8(3)  |
| P(3)-Pt(2)-P(4)-C(20B)     | 86.3(6)    |
| Pt(1)-Pt(2)-P(4)-C(20B)    | 47.8(2)    |
| C(2)-C(3)-C(4)-C(5)        | 22(18)     |
| C(2B)-C(3B)-C(4B)-C(5B)    | -90.1(14)  |
| C(2A)-C(3A)-C(4A)-C(5A)    | -60.9(8)   |
| C(3)-C(4)-C(5)-C(6)        | -5(18)     |
| C(3B)-C(4B)-C(5B)-C(6B)    | -176.1(10) |
| C(3A)-C(4A)-C(5A)-C(6A)    | -60.6(8)   |
| C(4)-C(5)-C(6)-C(7)        | 1(45)      |
| C(4B)-C(5B)-C(6B)-C(7B)    | -161.4(13) |
| C(4A)-C(5A)-C(6A)-C(7A)    | -178.2(6)  |
| C(5)-C(6)-C(7)-C(8)        | -78(100)   |
| C(5B)-C(6B)-C(7B)-C(8B)    | -81.9(12)  |
| C(5A)-C(6A)-C(7A)-C(8A)    | -178.0(10) |
| C(6)-C(7)-C(8)-Pt(2)       | -44(99)    |
| C(61)-Pt(2)-C(8)-C(7)      | 24(9)      |
| P(3)-Pt(2)-C(8)-C(7)       | 111(6)     |
| P(4)-Pt(2)-C(8)-C(7)       | -73(6)     |
| Pt(1)-Pt(2)-C(8)-C(7)      | 75(6)      |
| C(6B)-C(7B)-C(8B)-C(9B)    | 169.0(8)   |
| C(6A)-C(7A)-C(8A)-C(9A)    | -35(2)     |
| C(7B)-C(8B)-C(9B)-C(10B)   | -72.9(10)  |
| C(7A)-C(8A)-C(9A)-C(10A)   | -166.5(15) |
| C(8B)-C(9B)-C(10B)-C(11B)  | -177.4(7)  |
| C(8A)-C(9A)-C(10A)-C(11A)  | -134(2)    |
| C(1)-Pt(1)-C(11)-C(12)     | -88(6)     |
| P(1)-Pt(1)-C(11)-C(12)     | -94.7(4)   |
| P(2)-Pt(1)-C(11)-C(12)     | 83.8(4)    |
| Pt(2)-Pt(1)-C(11)-C(12)    | -54.5(8)   |
| C(1)-Pt(1)-C(11)-C(16)     | 91(6)      |
| P(1)-Pt(1)-C(11)-C(16)     | 85.0(4)    |
| P(2)-Pt(1)-C(11)-C(16)     | -96.6(4)   |
| Pt(2)-Pt(1)-C(11)-C(16)    | 125.1(5)   |
| C(9B)-C(10B)-C(11B)-C(12B) | 174.2(7)   |

|                             |           |
|-----------------------------|-----------|
| C(9A)-C(10A)-C(11A)-C(12A)  | 98.4(14)  |
| C(16)-C(11)-C(12)-F(12)     | -176.3(4) |
| Pt(1)-C(11)-C(12)-F(12)     | 3.4(6)    |
| C(16)-C(11)-C(12)-C(13)     | 2.4(7)    |
| Pt(1)-C(11)-C(12)-C(13)     | -177.9(4) |
| C(10B)-C(11B)-C(12B)-C(13B) | -61.5(11) |
| C(10A)-C(11A)-C(12A)-C(13A) | 162.1(16) |
| F(12)-C(12)-C(13)-F(13)     | -2.6(7)   |
| C(11)-C(12)-C(13)-F(13)     | 178.7(5)  |
| F(12)-C(12)-C(13)-C(14)     | 176.5(5)  |
| C(11)-C(12)-C(13)-C(14)     | -2.2(8)   |
| C(11B)-C(12B)-C(13B)-C(14B) | -57.2(11) |
| C(11A)-C(12A)-C(13A)-C(14A) | -174(4)   |
| F(13)-C(13)-C(14)-F(14)     | -0.3(8)   |
| C(12)-C(13)-C(14)-F(14)     | -179.4(5) |
| F(13)-C(13)-C(14)-C(15)     | -180.0(5) |
| C(12)-C(13)-C(14)-C(15)     | 0.9(8)    |
| C(12B)-C(13B)-C(14B)-C(15B) | -173.1(7) |
| C(12A)-C(13A)-C(14A)-C(15A) | -95(8)    |
| F(14)-C(14)-C(15)-F(15)     | 1.3(8)    |
| C(13)-C(14)-C(15)-F(15)     | -179.1(5) |
| F(14)-C(14)-C(15)-C(16)     | -179.8(5) |
| C(13)-C(14)-C(15)-C(16)     | -0.1(8)   |
| C(13B)-C(14B)-C(15B)-C(16B) | 173.3(7)  |
| C(13A)-C(14A)-C(15A)-C(16A) | -132(9)   |
| C(12)-C(11)-C(16)-F(16)     | 177.7(4)  |
| Pt(1)-C(11)-C(16)-F(16)     | -2.0(6)   |
| C(12)-C(11)-C(16)-C(15)     | -1.5(7)   |
| Pt(1)-C(11)-C(16)-C(15)     | 178.8(4)  |
| F(15)-C(15)-C(16)-F(16)     | 0.2(7)    |
| C(14)-C(15)-C(16)-F(16)     | -178.7(4) |
| F(15)-C(15)-C(16)-C(11)     | 179.4(5)  |
| C(14)-C(15)-C(16)-C(11)     | 0.5(8)    |
| C(14B)-C(15B)-C(16B)-C(17B) | 65.7(10)  |
| C(14A)-C(15A)-C(16A)-C(17A) | 81(4)     |
| C(15B)-C(16B)-C(17B)-C(18B) | 175.1(6)  |
| C(15A)-C(16A)-C(17A)-C(18A) | 43(4)     |
| C(16B)-C(17B)-C(18B)-C(19B) | 172.5(6)  |

|                             |            |
|-----------------------------|------------|
| C(16A)-C(17A)-C(18A)-C(19A) | -138.8(16) |
| C(17B)-C(18B)-C(19B)-C(20B) | 75.3(8)    |
| C(17A)-C(18A)-C(19A)-C(20A) | 175.2(8)   |
| C(18B)-C(19B)-C(20B)-P(4)   | -165.1(5)  |
| C(101)-P(4)-C(20B)-C(19B)   | 172.3(5)   |
| C(91)-P(4)-C(20B)-C(19B)    | -77.2(5)   |
| Pt(2)-P(4)-C(20B)-C(19B)    | 50.2(5)    |
| C(18A)-C(19A)-C(20A)-P(3)   | -167.1(6)  |
| C(81)-P(3)-C(20A)-C(19A)    | 163.8(5)   |
| C(71)-P(3)-C(20A)-C(19A)    | -86.6(6)   |
| Pt(2)-P(3)-C(20A)-C(19A)    | 41.2(6)    |
| C(31)-P(1)-C(21)-C(26)      | 123.1(5)   |
| C(1A)-P(1)-C(21)-C(26)      | -124.3(5)  |
| Pt(1)-P(1)-C(21)-C(26)      | -2.9(5)    |
| C(31)-P(1)-C(21)-C(22)      | -56.0(5)   |
| C(1A)-P(1)-C(21)-C(22)      | 56.6(5)    |
| Pt(1)-P(1)-C(21)-C(22)      | 178.0(4)   |
| C(26)-C(21)-C(22)-C(23)     | 0.4(9)     |
| P(1)-C(21)-C(22)-C(23)      | 179.5(5)   |
| C(21)-C(22)-C(23)-C(24)     | -0.5(11)   |
| C(22)-C(23)-C(24)-C(25)     | 0.5(12)    |
| C(23)-C(24)-C(25)-C(26)     | -0.3(11)   |
| C(22)-C(21)-C(26)-C(25)     | -0.3(9)    |
| P(1)-C(21)-C(26)-C(25)      | -179.3(5)  |
| C(24)-C(25)-C(26)-C(21)     | 0.2(10)    |
| C(21)-P(1)-C(31)-C(32)      | -31.1(4)   |
| C(1A)-P(1)-C(31)-C(32)      | -141.4(4)  |
| Pt(1)-P(1)-C(31)-C(32)      | 91.8(4)    |
| C(21)-P(1)-C(31)-C(36)      | 153.8(4)   |
| C(1A)-P(1)-C(31)-C(36)      | 43.5(4)    |
| Pt(1)-P(1)-C(31)-C(36)      | -83.3(4)   |
| C(36)-C(31)-C(32)-C(33)     | -1.1(8)    |
| P(1)-C(31)-C(32)-C(33)      | -176.3(4)  |
| C(31)-C(32)-C(33)-C(34)     | 1.6(8)     |
| C(32)-C(33)-C(34)-C(35)     | -1.4(8)    |
| C(33)-C(34)-C(35)-C(36)     | 0.9(8)     |
| C(34)-C(35)-C(36)-C(31)     | -0.5(8)    |
| C(32)-C(31)-C(36)-C(35)     | 0.6(7)     |

|                         |           |
|-------------------------|-----------|
| P(1)-C(31)-C(36)-C(35)  | 175.7(4)  |
| C(51)-P(2)-C(41)-C(46)  | 103.1(5)  |
| C(1B)-P(2)-C(41)-C(46)  | -143.6(5) |
| Pt(1)-P(2)-C(41)-C(46)  | -20.9(5)  |
| C(51)-P(2)-C(41)-C(42)  | -77.8(5)  |
| C(1B)-P(2)-C(41)-C(42)  | 35.5(5)   |
| Pt(1)-P(2)-C(41)-C(42)  | 158.1(4)  |
| C(46)-C(41)-C(42)-C(43) | -0.1(9)   |
| P(2)-C(41)-C(42)-C(43)  | -179.1(5) |
| C(41)-C(42)-C(43)-C(44) | -1.6(11)  |
| C(42)-C(43)-C(44)-C(45) | 1.4(11)   |
| C(43)-C(44)-C(45)-C(46) | 0.5(10)   |
| C(42)-C(41)-C(46)-C(45) | 1.9(9)    |
| P(2)-C(41)-C(46)-C(45)  | -179.0(5) |
| C(44)-C(45)-C(46)-C(41) | -2.2(9)   |
| C(41)-P(2)-C(51)-C(52)  | 164.8(4)  |
| C(1B)-P(2)-C(51)-C(52)  | 54.5(5)   |
| Pt(1)-P(2)-C(51)-C(52)  | -72.6(5)  |
| C(41)-P(2)-C(51)-C(56)  | -23.9(5)  |
| C(1B)-P(2)-C(51)-C(56)  | -134.1(5) |
| Pt(1)-P(2)-C(51)-C(56)  | 98.7(5)   |
| C(56)-C(51)-C(52)-C(53) | -0.7(8)   |
| P(2)-C(51)-C(52)-C(53)  | 170.8(4)  |
| C(51)-C(52)-C(53)-C(54) | -0.5(9)   |
| C(52)-C(53)-C(54)-C(55) | 2.1(9)    |
| C(53)-C(54)-C(55)-C(56) | -2.4(10)  |
| C(54)-C(55)-C(56)-C(51) | 1.2(10)   |
| C(52)-C(51)-C(56)-C(55) | 0.3(9)    |
| P(2)-C(51)-C(56)-C(55)  | -171.1(5) |
| C(8)-Pt(2)-C(61)-C(62)  | 12(4)     |
| P(3)-Pt(2)-C(61)-C(62)  | -74.6(5)  |
| P(4)-Pt(2)-C(61)-C(62)  | 108.5(5)  |
| Pt(1)-Pt(2)-C(61)-C(62) | -23.5(13) |
| C(8)-Pt(2)-C(61)-C(66)  | -168(3)   |
| P(3)-Pt(2)-C(61)-C(66)  | 104.9(5)  |
| P(4)-Pt(2)-C(61)-C(66)  | -72.0(5)  |
| Pt(1)-Pt(2)-C(61)-C(66) | 155.9(7)  |
| C(66)-C(61)-C(62)-F(62) | -179.5(5) |



|                         |           |
|-------------------------|-----------|
| Pt(2)-C(61)-C(62)-F(62) | 0.0(8)    |
| C(66)-C(61)-C(62)-C(63) | -0.2(9)   |
| Pt(2)-C(61)-C(62)-C(63) | 179.4(5)  |
| F(62)-C(62)-C(63)-F(63) | -0.7(10)  |
| C(61)-C(62)-C(63)-F(63) | 180.0(6)  |
| F(62)-C(62)-C(63)-C(64) | 178.2(7)  |
| C(61)-C(62)-C(63)-C(64) | -1.1(11)  |
| F(63)-C(63)-C(64)-F(64) | -2.0(12)  |
| C(62)-C(63)-C(64)-F(64) | 179.1(7)  |
| F(63)-C(63)-C(64)-C(65) | -179.8(7) |
| C(62)-C(63)-C(64)-C(65) | 1.3(13)   |
| F(64)-C(64)-C(65)-F(65) | 0.9(14)   |
| C(63)-C(64)-C(65)-F(65) | 178.7(8)  |
| F(64)-C(64)-C(65)-C(66) | -177.9(7) |
| C(63)-C(64)-C(65)-C(66) | -0.2(13)  |
| C(62)-C(61)-C(66)-F(66) | 179.2(5)  |
| Pt(2)-C(61)-C(66)-F(66) | -0.3(8)   |
| C(62)-C(61)-C(66)-C(65) | 1.4(10)   |
| Pt(2)-C(61)-C(66)-C(65) | -178.2(6) |
| F(65)-C(65)-C(66)-F(66) | 2.0(11)   |
| C(64)-C(65)-C(66)-F(66) | -179.2(7) |
| F(65)-C(65)-C(66)-C(61) | 179.9(7)  |
| C(64)-C(65)-C(66)-C(61) | -1.2(13)  |
| C(81)-P(3)-C(71)-C(72)  | -20.9(6)  |
| C(20A)-P(3)-C(71)-C(72) | -128.8(5) |
| Pt(2)-P(3)-C(71)-C(72)  | 104.5(5)  |
| C(81)-P(3)-C(71)-C(76)  | 164.1(5)  |
| C(20A)-P(3)-C(71)-C(76) | 56.2(5)   |
| Pt(2)-P(3)-C(71)-C(76)  | -70.5(5)  |
| C(76)-C(71)-C(72)-C(73) | -0.6(9)   |
| P(3)-C(71)-C(72)-C(73)  | -175.6(5) |
| C(71)-C(72)-C(73)-C(74) | 1.0(10)   |
| C(72)-C(73)-C(74)-C(75) | -0.8(11)  |
| C(73)-C(74)-C(75)-C(76) | 0.1(11)   |
| C(74)-C(75)-C(76)-C(71) | 0.3(10)   |
| C(72)-C(71)-C(76)-C(75) | -0.1(9)   |
| P(3)-C(71)-C(76)-C(75)  | 175.1(5)  |
| C(71)-P(3)-C(81)-C(82)  | 124.2(5)  |

|                             |           |
|-----------------------------|-----------|
| C(20A)-P(3)-C(81)-C(82)     | -123.9(5) |
| Pt(2)-P(3)-C(81)-C(82)      | -1.8(6)   |
| C(71)-P(3)-C(81)-C(86)      | -57.3(5)  |
| C(20A)-P(3)-C(81)-C(86)     | 54.5(6)   |
| Pt(2)-P(3)-C(81)-C(86)      | 176.6(4)  |
| C(86)-C(81)-C(82)-C(83)     | -1.3(10)  |
| P(3)-C(81)-C(82)-C(83)      | 177.1(5)  |
| C(81)-C(82)-C(83)-C(84)     | 1.8(12)   |
| C(82)-C(83)-C(84)-C(85)     | -1.3(14)  |
| C(83)-C(84)-C(85)-C(86)     | 0.4(15)   |
| C(84)-C(85)-C(86)-C(81)     | 0.1(13)   |
| C(82)-C(81)-C(86)-C(85)     | 0.3(10)   |
| P(3)-C(81)-C(86)-C(85)      | -178.1(6) |
| C(101)-P(4)-C(91)-C(92)     | 179.2(5)  |
| C(20B)-P(4)-C(91)-C(92)     | 68.6(5)   |
| Pt(2)-P(4)-C(91)-C(92)      | -57.5(6)  |
| C(101)-P(4)-C(91)-C(96)     | -9.2(6)   |
| C(20B)-P(4)-C(91)-C(96)     | -119.8(5) |
| Pt(2)-P(4)-C(91)-C(96)      | 114.1(5)  |
| C(96)-C(91)-C(92)-C(93)     | -0.8(10)  |
| P(4)-C(91)-C(92)-C(93)      | 171.1(5)  |
| C(91)-C(92)-C(93)-C(94)     | -0.3(10)  |
| C(92)-C(93)-C(94)-C(95)     | 1.8(12)   |
| C(93)-C(94)-C(95)-C(96)     | -2.2(13)  |
| C(94)-C(95)-C(96)-C(91)     | 1.1(12)   |
| C(92)-C(91)-C(96)-C(95)     | 0.4(10)   |
| P(4)-C(91)-C(96)-C(95)      | -171.1(5) |
| C(91)-P(4)-C(101)-C(106)    | -75.6(6)  |
| C(20B)-P(4)-C(101)-C(106)   | 37.0(7)   |
| Pt(2)-P(4)-C(101)-C(106)    | 159.4(6)  |
| C(91)-P(4)-C(101)-C(102)    | 103.9(6)  |
| C(20B)-P(4)-C(101)-C(102)   | -143.5(5) |
| Pt(2)-P(4)-C(101)-C(102)    | -21.1(6)  |
| C(106)-C(101)-C(102)-C(103) | -1.1(10)  |
| P(4)-C(101)-C(102)-C(103)   | 179.4(5)  |
| C(101)-C(102)-C(103)-C(104) | 0.0(11)   |
| C(102)-C(103)-C(104)-C(105) | 0.0(14)   |
| C(103)-C(104)-C(105)-C(106) | 1.1(16)   |

|                             |           |
|-----------------------------|-----------|
| C(102)-C(101)-C(106)-C(105) | 2.1(12)   |
| P(4)-C(101)-C(106)-C(105)   | -178.4(7) |
| C(104)-C(105)-C(106)-C(101) | -2.2(16)  |

---

Table S7. Crystal data and structure refinement for **5**.

|                                   |                                             |                            |
|-----------------------------------|---------------------------------------------|----------------------------|
| Empirical formula                 | $C_{108}H_{120}F_{10}P_4Pt_2$               |                            |
| Formula weight                    | 2122.10                                     |                            |
| Temperature                       | 173(2) K                                    |                            |
| Wavelength                        | 0.71073 Å                                   |                            |
| Crystal system                    | Triclinic                                   |                            |
| Space group                       | P-1                                         |                            |
| Unit cell dimensions              | $a = 11.4000(2)$ Å                          | $\alpha = 83.968(1)^\circ$ |
|                                   | $b = 14.3770(3)$ Å                          | $\beta = 80.358(1)^\circ$  |
|                                   | $c = 15.1140(3)$ Å                          | $\gamma = 80.128(1)^\circ$ |
| Volume                            | 2398.55(8) Å <sup>3</sup>                   |                            |
| Z                                 | 1                                           |                            |
| Density (calculated)              | 1.469 Mg/m <sup>3</sup>                     |                            |
| Absorption coefficient            | 3.047 mm <sup>-1</sup>                      |                            |
| F(000)                            | 1074                                        |                            |
| Crystal size                      | 0.20 × 0.15 × 0.10 mm <sup>3</sup>          |                            |
| Θ range for data collection       | 1.91 to 27.52°                              |                            |
| Index ranges                      | -14 ≤ h ≤ 14, -18 ≤ k ≤ 18, -19 ≤ l ≤ 19    |                            |
| Reflections collected             | 20633                                       |                            |
| Independent reflections           | 10992 [R(int) = 0.0250]                     |                            |
| Reflections [I > 2σ(I)]           | 9513                                        |                            |
| Completeness to Θ = 27.52°        | 99.5%                                       |                            |
| Absorption correction             | Empirical (Scalepack)                       |                            |
| Max. and min. transmission        | 0.7504 and 0.5809                           |                            |
| Refinement method                 | Full-matrix least-squares on F <sup>2</sup> |                            |
| Data / restraints / parameters    | 10992 / 0 / 559                             |                            |
| Goodness-of-fit on F <sup>2</sup> | 1.019                                       |                            |
| Final R indices [I > 2σ(I)]       | R1 = 0.0303, wR2 = 0.0712                   |                            |
| R indices (all data)              | R1 = 0.0395, wR2 = 0.0748                   |                            |
| Largest diff. peak and hole       | 1.619 and -1.191 eÅ <sup>-3</sup>           |                            |

Table S8. Atomic coordinates ( $\times 10^4$ ) and equivalent isotropic displacement parameters ( $\text{\AA}^2 \times 10^3$ ) for **5**.  $U(\text{eq})$  is defined as one third of the trace of the orthogonalized  $U^{\text{ij}}$  tensor.

|       | x        | y        | z        | U(eq) |
|-------|----------|----------|----------|-------|
| Pt(1) | 1903(1)  | -2136(1) | 1412(1)  | 29(1) |
| P(1)  | 29(1)    | -2178(1) | 1037(1)  | 30(1) |
| C(1)  | 1203(3)  | -1695(2) | 2610(2)  | 33(1) |
| P(2)  | 3792(1)  | -2226(1) | 1816(1)  | 31(1) |
| C(2)  | 843(3)   | -1292(2) | 3297(2)  | 37(1) |
| C(3)  | 478(3)   | -775(3)  | 4031(2)  | 42(1) |
| C(4)  | 167(3)   | -279(3)  | 4653(2)  | 45(1) |
| C(11) | 2697(3)  | -2451(2) | 134(2)   | 33(1) |
| F(12) | 2792(2)  | -4114(2) | 382(2)   | 62(1) |
| C(12) | 3037(3)  | -3340(3) | -176(2)  | 43(1) |
| F(13) | 3995(2)  | -4408(2) | -1263(2) | 83(1) |
| C(13) | 3656(3)  | -3512(3) | -1028(3) | 54(1) |
| F(14) | 4575(3)  | -2921(2) | -2434(2) | 89(1) |
| C(14) | 3950(4)  | -2762(3) | -1608(2) | 56(1) |
| F(15) | 3967(3)  | -1125(2) | -1894(2) | 82(1) |
| C(15) | 3644(3)  | -1866(3) | -1339(2) | 52(1) |
| F(16) | 2757(2)  | -823(2)  | -265(2)  | 55(1) |
| C(16) | 3016(3)  | -1727(3) | -493(2)  | 41(1) |
| C(21) | -1276(3) | -1424(2) | 1615(2)  | 40(1) |
| C(22) | -1826(3) | -1841(3) | 2532(2)  | 47(1) |
| C(23) | -2837(3) | -1127(3) | 3007(3)  | 52(1) |
| C(24) | -2407(4) | -308(3)  | 3331(3)  | 62(1) |
| C(25) | -3377(4) | 368(3)   | 3867(3)  | 57(1) |
| C(26) | -2872(4) | 1214(4)  | 4106(3)  | 68(1) |
| C(27) | -3783(4) | 1938(3)  | 4605(3)  | 66(1) |
| C(28) | -3233(5) | 2684(4)  | 4946(3)  | 76(1) |
| C(29) | -2470(5) | 3263(3)  | 4250(3)  | 72(1) |
| C(30) | -2100(5) | 4089(3)  | 4626(3)  | 71(1) |
| C(31) | -1137(4) | 3790(3)  | 5236(3)  | 69(1) |
| C(32) | 116(4)   | 3585(4)  | 4720(3)  | 68(1) |
| C(33) | 1092(4)  | 3207(3)  | 5304(3)  | 66(1) |
| C(34) | 2371(5)  | 3237(3)  | 4827(3)  | 70(1) |
| C(35) | 2698(4)  | 2744(3)  | 3952(3)  | 60(1) |

|       |          |          |          |       |
|-------|----------|----------|----------|-------|
| C(36) | 2768(4)  | 1676(3)  | 4084(3)  | 57(1) |
| C(37) | 3051(4)  | 1211(3)  | 3196(3)  | 51(1) |
| C(38) | 3336(3)  | 141(3)   | 3314(3)  | 47(1) |
| C(39) | 3517(3)  | -348(3)  | 2439(2)  | 45(1) |
| C(40) | 3934(3)  | -1406(2) | 2619(2)  | 39(1) |
| C(41) | -375(3)  | -3356(2) | 1279(2)  | 36(1) |
| C(42) | 131(4)   | -3983(3) | 1916(3)  | 61(1) |
| C(43) | -272(4)  | -4834(3) | 2176(4)  | 80(2) |
| C(44) | -1173(4) | -5073(3) | 1792(4)  | 71(1) |
| C(45) | -1691(5) | -4459(3) | 1168(4)  | 74(1) |
| C(46) | -1283(4) | -3608(3) | 907(3)   | 64(1) |
| C(51) | -81(3)   | -1859(2) | -146(2)  | 34(1) |
| C(52) | 329(3)   | -2508(3) | -791(2)  | 43(1) |
| C(53) | 317(4)   | -2222(3) | -1698(3) | 55(1) |
| C(54) | -101(3)  | -1301(3) | -1967(3) | 54(1) |
| C(55) | -524(3)  | -660(3)  | -1337(3) | 49(1) |
| C(56) | -518(3)  | -932(2)  | -430(2)  | 39(1) |
| C(61) | 5030(3)  | -2172(2) | 887(2)   | 37(1) |
| C(62) | 5498(3)  | -2988(3) | 435(2)   | 44(1) |
| C(63) | 6354(3)  | -2939(3) | -332(3)  | 52(1) |
| C(64) | 6767(3)  | -2095(3) | -630(3)  | 57(1) |
| C(65) | 6338(3)  | -1303(3) | -180(3)  | 53(1) |
| C(66) | 5471(3)  | -1333(3) | 575(2)   | 45(1) |
| C(71) | 4220(3)  | -3363(2) | 2428(2)  | 39(1) |
| C(72) | 5305(4)  | -3564(3) | 2764(3)  | 57(1) |
| C(73) | 5581(5)  | -4414(4) | 3272(3)  | 73(1) |
| C(74) | 4802(5)  | -5058(3) | 3435(3)  | 70(1) |
| C(75) | 3762(4)  | -4879(3) | 3084(4)  | 74(1) |
| C(76) | 3452(4)  | -4027(3) | 2581(3)  | 60(1) |

---

Table S9. Bond lengths [Å] and angles [°] for **5**.

---

|               |            |
|---------------|------------|
| Pt(1)-C(1)    | 1.976(3)   |
| Pt(1)-C(11)   | 2.052(3)   |
| Pt(1)-P(1)    | 2.3123(8)  |
| Pt(1)-P(2)    | 2.3144(8)  |
| Pt(1)-Pt(1)#1 | 12.7798(3) |
| P(1)-C(41)    | 1.814(3)   |
| P(1)-C(51)    | 1.818(3)   |
| P(1)-C(21)    | 1.834(3)   |
| C(1)-C(2)     | 1.218(4)   |
| P(2)-C(61)    | 1.822(3)   |
| P(2)-C(40)    | 1.822(3)   |
| P(2)-C(71)    | 1.824(3)   |
| C(2)-C(3)     | 1.367(5)   |
| C(3)-C(4)     | 1.209(5)   |
| C(4)-C(4)#1   | 1.351(7)   |
| C(11)-C(12)   | 1.378(5)   |
| C(11)-C(16)   | 1.386(5)   |
| F(12)-C(12)   | 1.362(4)   |
| C(12)-C(13)   | 1.386(5)   |
| F(13)-C(13)   | 1.347(5)   |
| C(13)-C(14)   | 1.368(6)   |
| F(14)-C(14)   | 1.350(4)   |
| C(14)-C(15)   | 1.362(6)   |
| F(15)-C(15)   | 1.349(5)   |
| C(15)-C(16)   | 1.373(5)   |
| F(16)-C(16)   | 1.351(4)   |
| C(21)-C(22)   | 1.528(5)   |
| C(22)-C(23)   | 1.539(5)   |
| C(23)-C(24)   | 1.505(6)   |
| C(24)-C(25)   | 1.524(5)   |
| C(25)-C(26)   | 1.530(6)   |
| C(26)-C(27)   | 1.504(6)   |
| C(27)-C(28)   | 1.505(7)   |
| C(28)-C(29)   | 1.523(7)   |
| C(29)-C(30)   | 1.518(7)   |
| C(30)-C(31)   | 1.528(7)   |

|                  |            |
|------------------|------------|
| C(31)-C(32)      | 1.505(6)   |
| C(32)-C(33)      | 1.527(7)   |
| C(33)-C(34)      | 1.520(6)   |
| C(34)-C(35)      | 1.527(6)   |
| C(35)-C(36)      | 1.517(6)   |
| C(36)-C(37)      | 1.525(5)   |
| C(37)-C(38)      | 1.514(5)   |
| C(38)-C(39)      | 1.530(5)   |
| C(39)-C(40)      | 1.524(5)   |
| C(41)-C(46)      | 1.373(5)   |
| C(41)-C(42)      | 1.378(5)   |
| C(42)-C(43)      | 1.376(6)   |
| C(43)-C(44)      | 1.368(7)   |
| C(44)-C(45)      | 1.361(7)   |
| C(45)-C(46)      | 1.379(6)   |
| C(51)-C(52)      | 1.388(5)   |
| C(51)-C(56)      | 1.391(5)   |
| C(52)-C(53)      | 1.392(5)   |
| C(53)-C(54)      | 1.371(6)   |
| C(54)-C(55)      | 1.366(6)   |
| C(55)-C(56)      | 1.386(5)   |
| C(61)-C(66)      | 1.392(5)   |
| C(61)-C(62)      | 1.400(5)   |
| C(62)-C(63)      | 1.389(5)   |
| C(63)-C(64)      | 1.381(6)   |
| C(64)-C(65)      | 1.363(6)   |
| C(65)-C(66)      | 1.381(5)   |
| C(71)-C(76)      | 1.380(5)   |
| C(71)-C(72)      | 1.388(5)   |
| C(72)-C(73)      | 1.391(6)   |
| C(73)-C(74)      | 1.366(7)   |
| C(74)-C(75)      | 1.353(7)   |
| C(75)-C(76)      | 1.396(6)   |
| <br>             |            |
| C(1)-Pt(1)-C(11) | 173.60(12) |
| C(1)-Pt(1)-P(1)  | 92.55(9)   |
| C(11)-Pt(1)-P(1) | 90.16(9)   |
| C(1)-Pt(1)-P(2)  | 88.16(9)   |



|                     |            |
|---------------------|------------|
| C(11)-Pt(1)-P(2)    | 89.61(9)   |
| P(1)-Pt(1)-P(2)     | 175.33(3)  |
| C(1)-Pt(1)-Pt(1)#1  | 10.60(9)   |
| C(11)-Pt(1)-Pt(1)#1 | 163.00(9)  |
| P(1)-Pt(1)-Pt(1)#1  | 96.503(19) |
| P(2)-Pt(1)-Pt(1)#1  | 85.00(2)   |
| C(41)-P(1)-C(51)    | 105.94(15) |
| C(41)-P(1)-C(21)    | 103.14(15) |
| C(51)-P(1)-C(21)    | 103.07(16) |
| C(41)-P(1)-Pt(1)    | 111.18(11) |
| C(51)-P(1)-Pt(1)    | 114.15(10) |
| C(21)-P(1)-Pt(1)    | 118.08(11) |
| C(2)-C(1)-Pt(1)     | 169.6(3)   |
| C(61)-P(2)-C(40)    | 107.76(16) |
| C(61)-P(2)-C(71)    | 103.44(15) |
| C(40)-P(2)-C(71)    | 101.17(16) |
| C(61)-P(2)-Pt(1)    | 115.71(11) |
| C(40)-P(2)-Pt(1)    | 116.52(11) |
| C(71)-P(2)-Pt(1)    | 110.51(12) |
| C(1)-C(2)-C(3)      | 175.2(4)   |
| C(4)-C(3)-C(2)      | 176.8(4)   |
| C(3)-C(4)-C(4)#1    | 179.3(5)   |
| C(12)-C(11)-C(16)   | 113.8(3)   |
| C(12)-C(11)-Pt(1)   | 126.7(3)   |
| C(16)-C(11)-Pt(1)   | 119.4(2)   |
| F(12)-C(12)-C(11)   | 119.5(3)   |
| F(12)-C(12)-C(13)   | 116.5(3)   |
| C(11)-C(12)-C(13)   | 123.9(4)   |
| F(13)-C(13)-C(14)   | 121.0(3)   |
| F(13)-C(13)-C(12)   | 120.0(4)   |
| C(14)-C(13)-C(12)   | 119.0(4)   |
| F(14)-C(14)-C(15)   | 120.7(4)   |
| F(14)-C(14)-C(13)   | 119.5(4)   |
| C(15)-C(14)-C(13)   | 119.8(3)   |
| F(15)-C(15)-C(14)   | 120.3(3)   |
| F(15)-C(15)-C(16)   | 120.4(4)   |
| C(14)-C(15)-C(16)   | 119.3(4)   |
| F(16)-C(16)-C(15)   | 116.2(3)   |

|                   |          |
|-------------------|----------|
| F(16)-C(16)-C(11) | 119.6(3) |
| C(15)-C(16)-C(11) | 124.1(3) |
| C(22)-C(21)-P(1)  | 115.3(3) |
| C(21)-C(22)-C(23) | 111.7(3) |
| C(24)-C(23)-C(22) | 114.3(3) |
| C(23)-C(24)-C(25) | 115.4(3) |
| C(24)-C(25)-C(26) | 111.5(4) |
| C(27)-C(26)-C(25) | 115.0(4) |
| C(28)-C(27)-C(26) | 113.6(4) |
| C(27)-C(28)-C(29) | 116.9(4) |
| C(30)-C(29)-C(28) | 113.5(4) |
| C(29)-C(30)-C(31) | 113.6(4) |
| C(32)-C(31)-C(30) | 113.1(4) |
| C(33)-C(32)-C(31) | 114.6(4) |
| C(32)-C(33)-C(34) | 114.5(4) |
| C(33)-C(34)-C(35) | 114.7(4) |
| C(36)-C(35)-C(34) | 113.9(4) |
| C(35)-C(36)-C(37) | 112.5(4) |
| C(38)-C(37)-C(36) | 113.2(3) |
| C(37)-C(38)-C(39) | 114.3(3) |
| C(40)-C(39)-C(38) | 109.9(3) |
| C(39)-C(40)-P(2)  | 120.0(2) |
| C(46)-C(41)-C(42) | 118.2(3) |
| C(46)-C(41)-P(1)  | 120.9(3) |
| C(42)-C(41)-P(1)  | 120.5(3) |
| C(43)-C(42)-C(41) | 120.7(4) |
| C(44)-C(43)-C(42) | 120.1(4) |
| C(45)-C(44)-C(43) | 120.0(4) |
| C(44)-C(45)-C(46) | 119.7(4) |
| C(41)-C(46)-C(45) | 121.3(4) |
| C(52)-C(51)-C(56) | 118.4(3) |
| C(52)-C(51)-P(1)  | 121.6(3) |
| C(56)-C(51)-P(1)  | 119.9(3) |
| C(51)-C(52)-C(53) | 120.1(4) |
| C(54)-C(53)-C(52) | 120.6(4) |
| C(55)-C(54)-C(53) | 119.7(4) |
| C(54)-C(55)-C(56) | 120.5(4) |
| C(55)-C(56)-C(51) | 120.6(3) |

|                   |          |
|-------------------|----------|
| C(66)-C(61)-C(62) | 118.9(3) |
| C(66)-C(61)-P(2)  | 122.2(3) |
| C(62)-C(61)-P(2)  | 118.7(3) |
| C(63)-C(62)-C(61) | 119.7(4) |
| C(62)-C(63)-C(64) | 120.0(4) |
| C(65)-C(64)-C(63) | 120.6(4) |
| C(64)-C(65)-C(66) | 120.2(4) |
| C(65)-C(66)-C(61) | 120.5(4) |
| C(76)-C(71)-C(72) | 119.2(4) |
| C(76)-C(71)-P(2)  | 120.1(3) |
| C(72)-C(71)-P(2)  | 120.7(3) |
| C(71)-C(72)-C(73) | 119.6(4) |
| C(74)-C(73)-C(72) | 120.7(4) |
| C(75)-C(74)-C(73) | 119.9(4) |
| C(74)-C(75)-C(76) | 120.8(5) |
| C(71)-C(76)-C(75) | 119.7(4) |

---

Symmetry transformations used to generate equivalent atoms:

#1  $-x, -y, -z+1$

Table S10. Anisotropic displacement parameters ( $\text{\AA}^2 \times 10^3$ ) for **5**. The anisotropic displacement factor exponent takes the form:  $-2\pi^2[h^2a^*2U^{11} + \dots + 2hka^*b^*U^{12}]$

|       | U <sup>11</sup> | U <sup>22</sup> | U <sup>33</sup> | U <sup>23</sup> | U <sup>13</sup> | U <sup>12</sup> |
|-------|-----------------|-----------------|-----------------|-----------------|-----------------|-----------------|
| Pt(1) | 29(1)           | 29(1)           | 28(1)           | -4(1)           | -4(1)           | -6(1)           |
| P(1)  | 30(1)           | 29(1)           | 32(1)           | -3(1)           | -5(1)           | -7(1)           |
| C(1)  | 31(2)           | 32(2)           | 36(2)           | -7(1)           | -6(1)           | -2(1)           |
| P(2)  | 29(1)           | 33(1)           | 30(1)           | 0(1)            | -5(1)           | -7(1)           |
| C(2)  | 32(2)           | 45(2)           | 34(2)           | -5(2)           | -7(1)           | -5(1)           |
| C(3)  | 35(2)           | 55(2)           | 37(2)           | -9(2)           | -7(1)           | -7(2)           |
| C(4)  | 39(2)           | 60(2)           | 37(2)           | -14(2)          | -8(2)           | -6(2)           |
| C(11) | 28(2)           | 40(2)           | 33(2)           | -7(1)           | -7(1)           | -6(1)           |
| F(12) | 72(2)           | 42(1)           | 70(2)           | -19(1)          | 20(1)           | -23(1)          |
| C(12) | 36(2)           | 51(2)           | 46(2)           | -14(2)          | 0(2)            | -16(2)          |
| F(13) | 80(2)           | 82(2)           | 90(2)           | -56(2)          | 31(2)           | -32(2)          |
| C(13) | 43(2)           | 68(3)           | 57(2)           | -35(2)          | 7(2)            | -19(2)          |
| F(14) | 86(2)           | 136(3)          | 42(1)           | -33(2)          | 21(1)           | -29(2)          |
| C(14) | 47(2)           | 90(3)           | 34(2)           | -17(2)          | 4(2)            | -18(2)          |
| F(15) | 88(2)           | 93(2)           | 47(1)           | 25(1)           | 10(1)           | -5(2)           |
| C(15) | 48(2)           | 70(3)           | 34(2)           | 9(2)            | -6(2)           | -9(2)           |
| F(16) | 60(1)           | 42(1)           | 53(1)           | 9(1)            | 2(1)            | 0(1)            |
| C(16) | 37(2)           | 50(2)           | 36(2)           | 0(2)            | -10(1)          | -2(2)           |
| C(21) | 34(2)           | 43(2)           | 42(2)           | -7(2)           | -3(1)           | -8(1)           |
| C(22) | 41(2)           | 56(2)           | 45(2)           | -11(2)          | 4(2)            | -13(2)          |
| C(23) | 40(2)           | 66(3)           | 49(2)           | -11(2)          | 2(2)            | -14(2)          |
| C(24) | 42(2)           | 75(3)           | 71(3)           | -26(2)          | -13(2)          | -2(2)           |
| C(25) | 52(2)           | 68(3)           | 49(2)           | -9(2)           | -12(2)          | 5(2)            |
| C(26) | 59(3)           | 82(3)           | 64(3)           | -22(2)          | -18(2)          | 6(2)            |
| C(27) | 67(3)           | 72(3)           | 53(2)           | -2(2)           | -12(2)          | 4(2)            |
| C(28) | 93(4)           | 63(3)           | 68(3)           | -9(2)           | -2(3)           | -8(3)           |
| C(29) | 83(3)           | 63(3)           | 65(3)           | 4(2)            | -17(2)          | 3(2)            |
| C(30) | 77(3)           | 58(3)           | 76(3)           | -3(2)           | -14(3)          | 1(2)            |
| C(31) | 75(3)           | 56(3)           | 70(3)           | -3(2)           | 2(2)            | -3(2)           |
| C(32) | 78(3)           | 65(3)           | 55(3)           | 0(2)            | 1(2)            | -10(2)          |
| C(33) | 82(3)           | 57(3)           | 55(3)           | -3(2)           | -3(2)           | -8(2)           |
| C(34) | 83(3)           | 49(2)           | 78(3)           | -7(2)           | -11(3)          | -13(2)          |
| C(35) | 65(3)           | 45(2)           | 66(3)           | -5(2)           | 2(2)            | -10(2)          |

|       |       |       |        |       |        |        |
|-------|-------|-------|--------|-------|--------|--------|
| C(36) | 70(3) | 46(2) | 56(2)  | -8(2) | -7(2)  | -14(2) |
| C(37) | 54(2) | 48(2) | 51(2)  | -3(2) | -7(2)  | -14(2) |
| C(38) | 49(2) | 44(2) | 50(2)  | -8(2) | -4(2)  | -16(2) |
| C(39) | 49(2) | 43(2) | 46(2)  | 2(2)  | -13(2) | -14(2) |
| C(40) | 36(2) | 44(2) | 39(2)  | -5(2) | -9(1)  | -11(1) |
| C(41) | 36(2) | 31(2) | 43(2)  | -1(1) | -10(1) | -9(1)  |
| C(42) | 52(2) | 59(3) | 78(3)  | 26(2) | -30(2) | -22(2) |
| C(43) | 76(3) | 61(3) | 105(4) | 42(3) | -39(3) | -26(2) |
| C(44) | 77(3) | 39(2) | 102(4) | 10(2) | -18(3) | -25(2) |
| C(45) | 85(3) | 54(3) | 99(4)  | 11(3) | -40(3) | -37(2) |
| C(46) | 75(3) | 48(2) | 83(3)  | 16(2) | -43(2) | -28(2) |
| C(51) | 30(2) | 37(2) | 36(2)  | 1(1)  | -8(1)  | -10(1) |
| C(52) | 42(2) | 45(2) | 43(2)  | -3(2) | -13(2) | 0(2)   |
| C(53) | 57(2) | 65(3) | 41(2)  | -8(2) | -11(2) | -1(2)  |
| C(54) | 50(2) | 73(3) | 39(2)  | 9(2)  | -13(2) | -16(2) |
| C(55) | 47(2) | 42(2) | 61(2)  | 17(2) | -22(2) | -17(2) |
| C(56) | 34(2) | 32(2) | 53(2)  | 1(2)  | -14(2) | -9(1)  |
| C(61) | 29(2) | 48(2) | 34(2)  | 4(1)  | -10(1) | -7(1)  |
| C(62) | 33(2) | 57(2) | 43(2)  | -2(2) | -5(2)  | -7(2)  |
| C(63) | 38(2) | 74(3) | 41(2)  | -6(2) | -3(2)  | -2(2)  |
| C(64) | 34(2) | 90(3) | 41(2)  | 9(2)  | -2(2)  | -8(2)  |
| C(65) | 43(2) | 67(3) | 48(2)  | 12(2) | -5(2)  | -18(2) |
| C(66) | 40(2) | 50(2) | 45(2)  | 7(2)  | -9(2)  | -11(2) |
| C(71) | 40(2) | 38(2) | 35(2)  | 2(1)  | -4(1)  | 0(1)   |
| C(72) | 52(2) | 54(2) | 66(3)  | 6(2)  | -27(2) | 0(2)   |
| C(73) | 79(3) | 68(3) | 66(3)  | 5(2)  | -31(3) | 21(3)  |
| C(74) | 82(3) | 47(2) | 61(3)  | 16(2) | 4(2)   | 16(2)  |
| C(75) | 65(3) | 47(2) | 95(4)  | 23(2) | 6(3)   | -3(2)  |
| C(76) | 48(2) | 47(2) | 78(3)  | 15(2) | -6(2)  | -6(2)  |

---

Table S11. Hydrogen coordinates ( $\times 10^4$ ) and isotropic displacement parameters ( $\text{\AA}^2 \times 10^3$ ) for **5**.

|        | x     | y     | z    | U(eq) |
|--------|-------|-------|------|-------|
| H(21A) | -1030 | -815  | 1698 | 47    |
| H(21B) | -1907 | -1286 | 1222 | 47    |
| H(22A) | -1188 | -2031 | 2916 | 57    |
| H(22B) | -2155 | -2415 | 2451 | 57    |
| H(23A) | -3413 | -875  | 2585 | 62    |
| H(23B) | -3276 | -1465 | 3528 | 62    |
| H(24A) | -2023 | 57    | 2802 | 74    |
| H(24B) | -1779 | -564  | 3711 | 74    |
| H(25A) | -3718 | 24    | 4428 | 69    |
| H(25B) | -4036 | 599   | 3509 | 69    |
| H(26A) | -2230 | 975   | 4477 | 82    |
| H(26B) | -2496 | 1531  | 3542 | 82    |
| H(27A) | -4358 | 2250  | 4201 | 79    |
| H(27B) | -4244 | 1609  | 5123 | 79    |
| H(28A) | -2726 | 2370  | 5397 | 91    |
| H(28B) | -3893 | 3126  | 5264 | 91    |
| H(29A) | -1736 | 2843  | 3997 | 86    |
| H(29B) | -2930 | 3510  | 3751 | 86    |
| H(30A) | -2821 | 4447  | 4971 | 85    |
| H(30B) | -1792 | 4521  | 4118 | 85    |
| H(31A) | -1167 | 4300  | 5634 | 83    |
| H(31B) | -1320 | 3217  | 5621 | 83    |
| H(32A) | 123   | 3116  | 4284 | 82    |
| H(32B) | 318   | 4174  | 4373 | 82    |
| H(33A) | 1016  | 2543  | 5524 | 79    |
| H(33B) | 950   | 3581  | 5836 | 79    |
| H(34A) | 2938  | 2938  | 5242 | 84    |
| H(34B) | 2485  | 3907  | 4693 | 84    |
| H(35A) | 2090  | 3002  | 3556 | 72    |
| H(35B) | 3487  | 2894  | 3640 | 72    |
| H(36A) | 1989  | 1522  | 4413 | 68    |
| H(36B) | 3399  | 1411  | 4458 | 68    |
| H(37A) | 2352  | 1390  | 2869 | 61    |

|        |       |       |       |    |
|--------|-------|-------|-------|----|
| H(37B) | 3747  | 1457  | 2821  | 61 |
| H(38A) | 2670  | -98   | 3735  | 56 |
| H(38B) | 4076  | -36   | 3594  | 56 |
| H(39A) | 2751  | -244  | 2191  | 54 |
| H(39B) | 4127  | -72   | 1991  | 54 |
| H(1A)  | 3487  | -1608 | 3208  | 46 |
| H(1B)  | 4794  | -1492 | 2690  | 46 |
| H(42A) | 765   | -3826 | 2179  | 74 |
| H(43A) | 76    | -5256 | 2622  | 95 |
| H(44A) | -1436 | -5667 | 1962  | 86 |
| H(45A) | -2332 | -4616 | 912   | 89 |
| H(46A) | -1637 | -3188 | 462   | 77 |
| H(52A) | 618   | -3148 | -612  | 52 |
| H(53A) | 600   | -2669 | -2136 | 65 |
| H(54A) | -95   | -1109 | -2588 | 64 |
| H(55A) | -825  | -24   | -1521 | 59 |
| H(56A) | -814  | -480  | 2     | 46 |
| H(62A) | 5230  | -3572 | 651   | 53 |
| H(63A) | 6656  | -3486 | -651  | 63 |
| H(64A) | 7355  | -2066 | -1153 | 68 |
| H(65A) | 6636  | -728  | -387  | 64 |
| H(66A) | 5174  | -778  | 884   | 54 |
| H(72A) | 5856  | -3123 | 2648  | 68 |
| H(73A) | 6318  | -4549 | 3509  | 87 |
| H(74A) | 4991  | -5630 | 3793  | 83 |
| H(75A) | 3237  | -5339 | 3181  | 88 |
| H(76A) | 2714  | -3905 | 2344  | 72 |

---

Table S12. Torsion angles [°] for **5**.

---

|                           |             |
|---------------------------|-------------|
| C(1)-Pt(1)-P(1)-C(41)     | -94.99(15)  |
| C(11)-Pt(1)-P(1)-C(41)    | 90.81(15)   |
| P(2)-Pt(1)-P(1)-C(41)     | 3.6(4)      |
| Pt(1)#1-Pt(1)-P(1)-C(41)  | -104.86(12) |
| C(1)-Pt(1)-P(1)-C(51)     | 145.24(15)  |
| C(11)-Pt(1)-P(1)-C(51)    | -28.96(15)  |
| P(2)-Pt(1)-P(1)-C(51)     | -116.2(3)   |
| Pt(1)#1-Pt(1)-P(1)-C(51)  | 135.37(12)  |
| C(1)-Pt(1)-P(1)-C(21)     | 23.89(16)   |
| C(11)-Pt(1)-P(1)-C(21)    | -150.31(16) |
| P(2)-Pt(1)-P(1)-C(21)     | 122.5(3)    |
| Pt(1)#1-Pt(1)-P(1)-C(21)  | 14.02(13)   |
| C(11)-Pt(1)-C(1)-C(2)     | 1(2)        |
| P(1)-Pt(1)-C(1)-C(2)      | -113.9(16)  |
| P(2)-Pt(1)-C(1)-C(2)      | 70.8(16)    |
| Pt(1)#1-Pt(1)-C(1)-C(2)   | -1.6(12)    |
| C(1)-Pt(1)-P(2)-C(61)     | -157.31(16) |
| C(11)-Pt(1)-P(2)-C(61)    | 16.68(16)   |
| P(1)-Pt(1)-P(2)-C(61)     | 103.9(3)    |
| Pt(1)#1-Pt(1)-P(2)-C(61)  | -147.18(13) |
| C(1)-Pt(1)-P(2)-C(40)     | -29.11(16)  |
| C(11)-Pt(1)-P(2)-C(40)    | 144.89(16)  |
| P(1)-Pt(1)-P(2)-C(40)     | -127.9(3)   |
| Pt(1)#1-Pt(1)-P(2)-C(40)  | -18.97(13)  |
| C(1)-Pt(1)-P(2)-C(71)     | 85.59(15)   |
| C(11)-Pt(1)-P(2)-C(71)    | -100.42(15) |
| P(1)-Pt(1)-P(2)-C(71)     | -13.2(4)    |
| Pt(1)#1-Pt(1)-P(2)-C(71)  | 95.72(11)   |
| Pt(1)-C(1)-C(2)-C(3)      | 3(6)        |
| C(1)-C(2)-C(3)-C(4)       | 11(10)      |
| C(2)-C(3)-C(4)-C(4)#1     | -57(58)     |
| C(1)-Pt(1)-C(11)-C(12)    | 159.3(10)   |
| P(1)-Pt(1)-C(11)-C(12)    | -85.7(3)    |
| P(2)-Pt(1)-C(11)-C(12)    | 89.7(3)     |
| Pt(1)#1-Pt(1)-C(11)-C(12) | 161.0(2)    |
| C(1)-Pt(1)-C(11)-C(16)    | -16.1(12)   |



|                           |           |
|---------------------------|-----------|
| P(1)-Pt(1)-C(11)-C(16)    | 99.0(3)   |
| P(2)-Pt(1)-C(11)-C(16)    | -85.7(3)  |
| Pt(1)#1-Pt(1)-C(11)-C(16) | -14.4(5)  |
| C(16)-C(11)-C(12)-F(12)   | 179.0(3)  |
| Pt(1)-C(11)-C(12)-F(12)   | 3.4(5)    |
| C(16)-C(11)-C(12)-C(13)   | 0.9(5)    |
| Pt(1)-C(11)-C(12)-C(13)   | -174.7(3) |
| F(12)-C(12)-C(13)-F(13)   | -0.8(5)   |
| C(11)-C(12)-C(13)-F(13)   | 177.4(3)  |
| F(12)-C(12)-C(13)-C(14)   | -178.5(3) |
| C(11)-C(12)-C(13)-C(14)   | -0.3(6)   |
| F(13)-C(13)-C(14)-F(14)   | 0.9(6)    |
| C(12)-C(13)-C(14)-F(14)   | 178.6(4)  |
| F(13)-C(13)-C(14)-C(15)   | -177.0(4) |
| C(12)-C(13)-C(14)-C(15)   | 0.6(6)    |
| F(14)-C(14)-C(15)-F(15)   | -0.3(6)   |
| C(13)-C(14)-C(15)-F(15)   | 177.7(4)  |
| F(14)-C(14)-C(15)-C(16)   | -179.5(3) |
| C(13)-C(14)-C(15)-C(16)   | -1.5(6)   |
| F(15)-C(15)-C(16)-F(16)   | -0.1(5)   |
| C(14)-C(15)-C(16)-F(16)   | 179.1(3)  |
| F(15)-C(15)-C(16)-C(11)   | -177.0(3) |
| C(14)-C(15)-C(16)-C(11)   | 2.2(6)    |
| C(12)-C(11)-C(16)-F(16)   | -178.6(3) |
| Pt(1)-C(11)-C(16)-F(16)   | -2.6(4)   |
| C(12)-C(11)-C(16)-C(15)   | -1.8(5)   |
| Pt(1)-C(11)-C(16)-C(15)   | 174.1(3)  |
| C(41)-P(1)-C(21)-C(22)    | 39.2(3)   |
| C(51)-P(1)-C(21)-C(22)    | 149.3(3)  |
| Pt(1)-P(1)-C(21)-C(22)    | -83.8(3)  |
| P(1)-C(21)-C(22)-C(23)    | 174.7(3)  |
| C(21)-C(22)-C(23)-C(24)   | -70.3(5)  |
| C(22)-C(23)-C(24)-C(25)   | -175.5(4) |
| C(23)-C(24)-C(25)-C(26)   | -175.7(4) |
| C(24)-C(25)-C(26)-C(27)   | 177.8(4)  |
| C(25)-C(26)-C(27)-C(28)   | 171.6(4)  |
| C(26)-C(27)-C(28)-C(29)   | 57.8(6)   |
| C(27)-C(28)-C(29)-C(30)   | 171.7(4)  |

|                         |           |
|-------------------------|-----------|
| C(28)-C(29)-C(30)-C(31) | 72.6(6)   |
| C(29)-C(30)-C(31)-C(32) | 80.7(6)   |
| C(30)-C(31)-C(32)-C(33) | -175.3(4) |
| C(31)-C(32)-C(33)-C(34) | -165.1(4) |
| C(32)-C(33)-C(34)-C(35) | -54.4(6)  |
| C(33)-C(34)-C(35)-C(36) | -68.1(6)  |
| C(34)-C(35)-C(36)-C(37) | 177.9(4)  |
| C(35)-C(36)-C(37)-C(38) | 170.1(4)  |
| C(36)-C(37)-C(38)-C(39) | 175.0(3)  |
| C(37)-C(38)-C(39)-C(40) | 173.8(3)  |
| C(38)-C(39)-C(40)-P(2)  | 161.4(2)  |
| C(61)-P(2)-C(40)-C(39)  | 79.0(3)   |
| C(71)-P(2)-C(40)-C(39)  | -172.8(3) |
| Pt(1)-P(2)-C(40)-C(39)  | -53.0(3)  |
| C(51)-P(1)-C(41)-C(46)  | -38.6(4)  |
| C(21)-P(1)-C(41)-C(46)  | 69.4(4)   |
| Pt(1)-P(1)-C(41)-C(46)  | -163.1(3) |
| C(51)-P(1)-C(41)-C(42)  | 148.6(3)  |
| C(21)-P(1)-C(41)-C(42)  | -103.5(3) |
| Pt(1)-P(1)-C(41)-C(42)  | 24.0(3)   |
| C(46)-C(41)-C(42)-C(43) | -0.5(7)   |
| P(1)-C(41)-C(42)-C(43)  | 172.5(4)  |
| C(41)-C(42)-C(43)-C(44) | 0.9(8)    |
| C(42)-C(43)-C(44)-C(45) | -1.5(9)   |
| C(43)-C(44)-C(45)-C(46) | 1.7(9)    |
| C(42)-C(41)-C(46)-C(45) | 0.7(7)    |
| P(1)-C(41)-C(46)-C(45)  | -172.3(4) |
| C(44)-C(45)-C(46)-C(41) | -1.3(8)   |
| C(41)-P(1)-C(51)-C(52)  | -41.3(3)  |
| C(21)-P(1)-C(51)-C(52)  | -149.3(3) |
| Pt(1)-P(1)-C(51)-C(52)  | 81.3(3)   |
| C(41)-P(1)-C(51)-C(56)  | 142.6(3)  |
| C(21)-P(1)-C(51)-C(56)  | 34.6(3)   |
| Pt(1)-P(1)-C(51)-C(56)  | -94.8(3)  |
| C(56)-C(51)-C(52)-C(53) | 1.1(5)    |
| P(1)-C(51)-C(52)-C(53)  | -175.1(3) |
| C(51)-C(52)-C(53)-C(54) | -0.1(6)   |
| C(52)-C(53)-C(54)-C(55) | -0.9(6)   |

|                         |           |
|-------------------------|-----------|
| C(53)-C(54)-C(55)-C(56) | 1.0(6)    |
| C(54)-C(55)-C(56)-C(51) | 0.0(5)    |
| C(52)-C(51)-C(56)-C(55) | -1.0(5)   |
| P(1)-C(51)-C(56)-C(55)  | 175.2(3)  |
| C(40)-P(2)-C(61)-C(66)  | -35.6(3)  |
| C(71)-P(2)-C(61)-C(66)  | -142.2(3) |
| Pt(1)-P(2)-C(61)-C(66)  | 96.9(3)   |
| C(40)-P(2)-C(61)-C(62)  | 148.8(3)  |
| C(71)-P(2)-C(61)-C(62)  | 42.2(3)   |
| Pt(1)-P(2)-C(61)-C(62)  | -78.8(3)  |
| C(66)-C(61)-C(62)-C(63) | -2.4(5)   |
| P(2)-C(61)-C(62)-C(63)  | 173.4(3)  |
| C(61)-C(62)-C(63)-C(64) | 1.9(6)    |
| C(62)-C(63)-C(64)-C(65) | -0.2(6)   |
| C(63)-C(64)-C(65)-C(66) | -0.8(6)   |
| C(64)-C(65)-C(66)-C(61) | 0.3(6)    |
| C(62)-C(61)-C(66)-C(65) | 1.4(5)    |
| P(2)-C(61)-C(66)-C(65)  | -174.3(3) |
| C(61)-P(2)-C(71)-C(76)  | -123.9(3) |
| C(40)-P(2)-C(71)-C(76)  | 124.6(3)  |
| Pt(1)-P(2)-C(71)-C(76)  | 0.5(3)    |
| C(61)-P(2)-C(71)-C(72)  | 57.7(3)   |
| C(40)-P(2)-C(71)-C(72)  | -53.9(3)  |
| Pt(1)-P(2)-C(71)-C(72)  | -177.9(3) |
| C(76)-C(71)-C(72)-C(73) | -2.1(6)   |
| P(2)-C(71)-C(72)-C(73)  | 176.4(3)  |
| C(71)-C(72)-C(73)-C(74) | 0.8(7)    |
| C(72)-C(73)-C(74)-C(75) | 1.4(7)    |
| C(73)-C(74)-C(75)-C(76) | -2.2(8)   |
| C(72)-C(71)-C(76)-C(75) | 1.3(6)    |
| P(2)-C(71)-C(76)-C(75)  | -177.2(3) |
| C(74)-C(75)-C(76)-C(71) | 0.9(7)    |

---

Symmetry transformations used to generate equivalent atoms:

#1 -x, -y, -z+1

Table S13. Crystal data and structure refinement for **6**·MeOH.

|                                   |                                                                                                |                 |
|-----------------------------------|------------------------------------------------------------------------------------------------|-----------------|
| Empirical formula                 | C <sub>97</sub> H <sub>100</sub> F <sub>10</sub> O <sub>5</sub> P <sub>4</sub> Pt <sub>2</sub> |                 |
| Formula weight                    | 2049.83                                                                                        |                 |
| Temperature                       | 173(2) K                                                                                       |                 |
| Wavelength                        | 0.71073 Å                                                                                      |                 |
| Crystal system                    | Monoclinic                                                                                     |                 |
| Space group                       | P2 <sub>1</sub> /n                                                                             |                 |
| Unit cell dimensions              | a = 21.4114(3) Å                                                                               | α = 90°         |
|                                   | b = 17.9695(3) Å                                                                               | β = 101.855(1)° |
|                                   | c = 24.2342(3) Å                                                                               | γ = 90°         |
| Volume                            | 9125.3(2) Å <sup>3</sup>                                                                       |                 |
| Z                                 | 4                                                                                              |                 |
| Density (calculated)              | 1.492 Mg/m <sup>3</sup>                                                                        |                 |
| Absorption coefficient            | 3.204 mm <sup>-1</sup>                                                                         |                 |
| F(000)                            | 4112                                                                                           |                 |
| Crystal size                      | 0.15 × 0.15 × 0.15 mm <sup>3</sup>                                                             |                 |
| Θ range for data collection       | 2.06 to 27.49°                                                                                 |                 |
| Index ranges                      | -27 ≤ h ≤ 27, -23 ≤ k ≤ 23, -31 ≤ l ≤ 31                                                       |                 |
| Reflections collected             | 39762                                                                                          |                 |
| Independent reflections           | 20905 [R(int) = 0.0497]                                                                        |                 |
| Reflections [I > 2σ(I)]           | 13238                                                                                          |                 |
| Completeness to Θ = 27.49°        | 99.7%                                                                                          |                 |
| Absorption correction             | Empirical (Scalepack)                                                                          |                 |
| Max. and min. transmission        | 0.6450 and 0.6450                                                                              |                 |
| Refinement method                 | Full-matrix least-squares on F <sup>2</sup>                                                    |                 |
| Data / restraints / parameters    | 20905 / 0 / 1063                                                                               |                 |
| Goodness-of-fit on F <sup>2</sup> | 0.966                                                                                          |                 |
| Final R indices [I > 2σ(I)]       | R1 = 0.0421, wR2 = 0.0848                                                                      |                 |
| R indices (all data)              | R1 = 0.0886, wR2 = 0.0979                                                                      |                 |
| Largest diff. peak and hole       | 1.123 and -0.956 eÅ <sup>-3</sup>                                                              |                 |

Table S14. Atomic coordinates ( $\times 10^4$ ) and equivalent isotropic displacement parameters ( $\text{\AA}^2 \times 10^3$ ) for **6**. U(eq) is defined as one third of the trace of the orthogonalized  $U^{ij}$  tensor.

|        | x       | y        | z        | U(eq)  |
|--------|---------|----------|----------|--------|
| Pt(1)  | 8253(1) | -6960(1) | 866(1)   | 40(1)  |
| P(1)   | 8039(1) | -6649(1) | 1729(1)  | 49(1)  |
| C(1)   | 8171(2) | -5902(3) | 643(2)   | 47(1)  |
| C(1B)  | 7887(2) | -6802(3) | -562(2)  | 48(1)  |
| C(1A)  | 8499(3) | -5820(3) | 2009(3)  | 62(2)  |
| Pt(2)  | 6665(1) | -749(1)  | -1560(1) | 35(1)  |
| P(2)   | 8494(1) | -7195(1) | 2(1)     | 40(1)  |
| C(2)   | 8080(3) | -5267(3) | 472(2)   | 48(1)  |
| C(2B)  | 7195(3) | -6967(3) | -542(3)  | 65(2)  |
| C(2A)  | 8372(3) | -5498(3) | 2549(2)  | 73(2)  |
| P(3)   | 6095(1) | -565(1)  | -857(1)  | 37(1)  |
| C(3)   | 7930(3) | -4575(3) | 249(2)   | 48(1)  |
| C(3A)  | 8879(4) | -4905(4) | 2784(3)  | 100(3) |
| C(3B)  | 6722(3) | -6476(4) | -955(3)  | 80(2)  |
| P(4)   | 7164(1) | -1115(1) | -2268(1) | 44(1)  |
| C(4)   | 7789(3) | -3977(3) | 32(2)    | 50(1)  |
| C(4A)  | 8986(3) | -4314(4) | 2381(3)  | 86(2)  |
| C(4B)  | 6717(4) | -5702(4) | -743(3)  | 99(3)  |
| C(5)   | 7614(3) | -3338(3) | -246(2)  | 51(1)  |
| O(5A)  | 8401(2) | -3916(3) | 2205(2)  | 91(1)  |
| O(5B)  | 6250(2) | -5300(3) | -1139(2) | 96(2)  |
| C(6)   | 7444(2) | -2790(3) | -541(2)  | 47(1)  |
| C(6B)  | 6210(4) | -4519(4) | -1021(4) | 114(3) |
| C(6A)  | 8339(4) | -3490(6) | 1688(4)  | 115(3) |
| C(7)   | 7243(2) | -2180(3) | -867(2)  | 47(1)  |
| C(7A)  | 8765(4) | -2856(5) | 1735(4)  | 116(3) |
| C(7B)  | 5841(5) | -4423(5) | -504(4)  | 130(4) |
| C(8)   | 7050(2) | -1636(3) | -1140(2) | 43(1)  |
| C(8B)  | 5651(4) | -3632(4) | -479(4)  | 111(3) |
| C(8A)  | 8652(4) | -2424(6) | 1150(5)  | 158(5) |
| C(9B)  | 5304(4) | -3484(5) | 5(4)     | 105(3) |
| C(9A)  | 9095(6) | -1946(7) | 1071(4)  | 154(5) |
| C(10B) | 5690(4) | -3651(5) | 571(4)   | 103(3) |

|        |         |           |          |        |
|--------|---------|-----------|----------|--------|
| C(10A) | 8957(5) | -1534(5)  | 516(3)   | 121(3) |
| C(11)  | 8281(2) | -8076(3)  | 1056(2)  | 41(1)  |
| C(11A) | 9038(3) | -1996(4)  | 12(3)    | 77(2)  |
| C(11B) | 6292(4) | -3199(4)  | 709(3)   | 88(2)  |
| C(12)  | 8822(3) | -8488(3)  | 1230(3)  | 59(2)  |
| F(12)  | 9401(2) | -8151(2)  | 1289(2)  | 96(1)  |
| O(12A) | 9042(2) | -1498(2)  | -449(2)  | 67(1)  |
| O(12B) | 6136(2) | -2422(2)  | 711(2)   | 72(1)  |
| F(13)  | 9374(2) | -9628(2)  | 1464(3)  | 134(2) |
| C(13)  | 8822(3) | -9246(3)  | 1325(3)  | 75(2)  |
| C(13A) | 9099(3) | -1860(3)  | -958(3)  | 61(2)  |
| C(13B) | 6698(3) | -1990(3)  | 859(3)   | 61(2)  |
| C(14)  | 8257(3) | -9612(3)  | 1265(3)  | 63(2)  |
| F(14)  | 8246(2) | -10348(2) | 1370(2)  | 101(1) |
| C(14B) | 6503(3) | -1185(3)  | 864(2)   | 55(1)  |
| C(14A) | 9080(2) | -1283(3)  | -1406(3) | 60(2)  |
| C(15)  | 7704(3) | -9227(3)  | 1105(3)  | 57(2)  |
| F(15)  | 7138(2) | -9584(2)  | 1037(2)  | 98(1)  |
| C(15B) | 6115(3) | -887(3)   | 305(2)   | 50(1)  |
| C(15A) | 8420(2) | -928(3)   | -1620(2) | 59(2)  |
| F(16)  | 7158(2) | -8128(2)  | 836(2)   | 84(1)  |
| C(16)  | 7728(2) | -8486(3)  | 997(2)   | 47(1)  |
| C(16B) | 6500(2) | -876(3)   | -159(2)  | 43(1)  |
| C(16A) | 7992(2) | -1419(3)  | -2035(2) | 54(1)  |
| C(21)  | 8263(3) | -7373(3)  | 2249(2)  | 60(2)  |
| C(22)  | 7826(3) | -7934(3)  | 2317(3)  | 69(2)  |
| C(23)  | 8042(4) | -8573(4)  | 2634(3)  | 88(2)  |
| C(24)  | 8682(5) | -8640(4)  | 2866(3)  | 102(3) |
| C(25)  | 9101(5) | -8065(5)  | 2820(4)  | 123(3) |
| C(26)  | 8895(4) | -7448(4)  | 2493(3)  | 92(2)  |
| C(31)  | 7211(3) | -6393(3)  | 1713(3)  | 57(2)  |
| C(32)  | 6974(3) | -6340(4)  | 2212(3)  | 81(2)  |
| C(33)  | 6359(4) | -6045(5)  | 2190(4)  | 98(3)  |
| C(34)  | 5980(4) | -5822(4)  | 1699(4)  | 98(3)  |
| C(35)  | 6213(4) | -5882(4)  | 1202(4)  | 94(2)  |
| C(36)  | 6826(3) | -6160(4)  | 1217(3)  | 69(2)  |
| C(41)  | 9225(2) | -6731(3)  | -100(2)  | 46(1)  |
| C(42)  | 9618(3) | -6398(3)  | 357(3)   | 62(2)  |

|       |          |          |          |        |
|-------|----------|----------|----------|--------|
| C(43) | 10158(3) | -6030(4) | 277(4)   | 90(2)  |
| C(44) | 10291(4) | -5970(4) | -245(5)  | 97(3)  |
| C(45) | 9908(3)  | -6298(4) | -700(4)  | 87(2)  |
| C(46) | 9370(3)  | -6697(3) | -628(3)  | 60(2)  |
| C(51) | 8602(2)  | -8164(3) | -165(2)  | 44(1)  |
| C(52) | 8092(3)  | -8637(3) | -342(2)  | 55(1)  |
| C(53) | 8192(3)  | -9391(3) | -425(3)  | 63(2)  |
| C(54) | 8792(3)  | -9668(3) | -338(3)  | 72(2)  |
| C(55) | 9304(3)  | -9209(3) | -163(3)  | 87(2)  |
| C(56) | 9210(3)  | -8469(3) | -84(3)   | 71(2)  |
| C(61) | 6260(2)  | 177(3)   | -2002(2) | 38(1)  |
| F(62) | 6924(2)  | 1015(2)  | -1398(1) | 65(1)  |
| C(62) | 6455(2)  | 896(3)   | -1858(2) | 45(1)  |
| F(63) | 6404(2)  | 2209(2)  | -1966(2) | 93(1)  |
| C(63) | 6209(3)  | 1529(3)  | -2134(3) | 63(2)  |
| C(64) | 5734(3)  | 1444(4)  | -2614(3) | 77(2)  |
| F(64) | 5473(2)  | 2044(2)  | -2913(2) | 123(2) |
| C(65) | 5523(3)  | 737(4)   | -2792(3) | 72(2)  |
| F(65) | 5061(2)  | 651(3)   | -3256(2) | 108(2) |
| F(66) | 5552(2)  | -538(2)  | -2671(1) | 68(1)  |
| C(66) | 5789(3)  | 143(3)   | -2472(2) | 53(1)  |
| C(71) | 5373(2)  | -1124(3) | -1023(2) | 40(1)  |
| C(72) | 4819(2)  | -944(3)  | -840(2)  | 52(1)  |
| C(73) | 4281(3)  | -1375(4) | -979(3)  | 61(2)  |
| C(74) | 4274(3)  | -2009(4) | -1299(3) | 65(2)  |
| C(75) | 4833(3)  | -2209(3) | -1467(3) | 68(2)  |
| C(76) | 5375(3)  | -1775(3) | -1337(2) | 57(2)  |
| C(81) | 5833(2)  | 386(3)   | -776(2)  | 44(1)  |
| C(82) | 6176(3)  | 861(3)   | -375(2)  | 52(1)  |
| C(83) | 6005(4)  | 1598(3)  | -362(3)  | 70(2)  |
| C(84) | 5500(4)  | 1868(3)  | -730(3)  | 76(2)  |
| C(85) | 5146(3)  | 1415(4)  | -1134(3) | 71(2)  |
| C(86) | 5320(3)  | 668(3)   | -1157(3) | 58(2)  |
| C(91) | 7132(2)  | -421(3)  | -2825(2) | 48(1)  |
| C(92) | 6750(3)  | -530(3)  | -3350(2) | 55(1)  |
| C(93) | 6669(3)  | 36(3)    | -3753(3) | 70(2)  |
| C(94) | 6979(4)  | 705(4)   | -3624(3) | 89(2)  |
| C(95) | 7364(4)  | 804(4)   | -3102(3) | 84(2)  |

|        |          |           |          |         |
|--------|----------|-----------|----------|---------|
| C(96)  | 7447(3)  | 246(3)    | -2702(3) | 67(2)   |
| C(101) | 6788(3)  | -1951(3)  | -2619(2) | 49(1)   |
| C(102) | 7102(3)  | -2425(3)  | -2927(2) | 61(2)   |
| C(103) | 6800(4)  | -3051(3)  | -3186(3) | 71(2)   |
| C(104) | 6192(4)  | -3221(4)  | -3161(3) | 78(2)   |
| C(105) | 5873(3)  | -2769(4)  | -2861(3) | 84(2)   |
| C(106) | 6172(3)  | -2128(3)  | -2586(3) | 66(2)   |
| O(200) | 5193(4)  | -5591(7)  | -1872(6) | 281(7)  |
| C(200) | 5581(10) | -5463(15) | -2352(6) | 430(20) |

---



Table S15. Bond lengths [Å] and angles [°] for **6**.

---

|             |            |
|-------------|------------|
| Pt(1)-C(1)  | 1.975(5)   |
| Pt(1)-C(11) | 2.056(5)   |
| Pt(1)-P(2)  | 2.2969(13) |
| Pt(1)-P(1)  | 2.2984(14) |
| Pt(1)-Pt(2) | 12.7478(3) |
| P(1)-C(21)  | 1.808(6)   |
| P(1)-C(31)  | 1.824(6)   |
| P(1)-C(1A)  | 1.838(6)   |
| C(1)-C(2)   | 1.216(7)   |
| C(1B)-C(2B) | 1.523(7)   |
| C(1B)-P(2)  | 1.823(5)   |
| C(1A)-C(2A) | 1.506(8)   |
| Pt(2)-C(8)  | 1.979(5)   |
| Pt(2)-C(61) | 2.069(5)   |
| Pt(2)-P(4)  | 2.2954(13) |
| Pt(2)-P(3)  | 2.3149(12) |
| P(2)-C(51)  | 1.812(5)   |
| P(2)-C(41)  | 1.835(5)   |
| C(2)-C(3)   | 1.367(7)   |
| C(2B)-C(3B) | 1.546(8)   |
| C(2A)-C(3A) | 1.544(9)   |
| P(3)-C(71)  | 1.819(5)   |
| P(3)-C(81)  | 1.822(5)   |
| P(3)-C(16B) | 1.824(5)   |
| C(3)-C(4)   | 1.207(7)   |
| C(3A)-C(4A) | 1.492(10)  |
| C(3B)-C(4B) | 1.484(9)   |
| P(4)-C(91)  | 1.828(5)   |
| P(4)-C(101) | 1.830(6)   |
| P(4)-C(16A) | 1.831(5)   |
| C(4)-C(5)   | 1.346(7)   |
| C(4A)-O(5A) | 1.429(8)   |
| C(4B)-O(5B) | 1.431(7)   |
| C(5)-C(6)   | 1.227(7)   |
| O(5A)-C(6A) | 1.451(9)   |
| O(5B)-C(6B) | 1.438(8)   |

|               |           |
|---------------|-----------|
| C(6)-C(7)     | 1.368(7)  |
| C(6B)-C(7B)   | 1.624(12) |
| C(6A)-C(7A)   | 1.449(11) |
| C(7)-C(8)     | 1.205(7)  |
| C(7A)-C(8A)   | 1.591(12) |
| C(7B)-C(8B)   | 1.484(10) |
| C(8B)-C(9B)   | 1.534(11) |
| C(8A)-C(9A)   | 1.320(12) |
| C(9B)-C(10B)  | 1.481(11) |
| C(9A)-C(10A)  | 1.512(11) |
| C(10B)-C(11B) | 1.502(10) |
| C(10A)-C(11A) | 1.515(10) |
| C(11)-C(12)   | 1.366(7)  |
| C(11)-C(16)   | 1.376(7)  |
| C(11A)-O(12A) | 1.434(7)  |
| C(11B)-O(12B) | 1.437(7)  |
| C(12)-F(12)   | 1.360(6)  |
| C(12)-C(13)   | 1.381(8)  |
| O(12A)-C(13A) | 1.421(7)  |
| O(12B)-C(13B) | 1.416(7)  |
| F(13)-C(13)   | 1.349(6)  |
| C(13)-C(14)   | 1.360(8)  |
| C(13A)-C(14A) | 1.495(8)  |
| C(13B)-C(14B) | 1.506(7)  |
| C(14)-F(14)   | 1.348(6)  |
| C(14)-C(15)   | 1.356(8)  |
| C(14B)-C(15B) | 1.533(7)  |
| C(14A)-C(15A) | 1.541(7)  |
| C(15)-F(15)   | 1.351(6)  |
| C(15)-C(16)   | 1.362(7)  |
| C(15B)-C(16B) | 1.524(6)  |
| C(15A)-C(16A) | 1.499(7)  |
| F(16)-C(16)   | 1.363(6)  |
| C(21)-C(26)   | 1.367(9)  |
| C(21)-C(22)   | 1.408(8)  |
| C(22)-C(23)   | 1.404(9)  |
| C(23)-C(24)   | 1.375(10) |
| C(24)-C(25)   | 1.388(11) |

|             |           |
|-------------|-----------|
| C(25)-C(26) | 1.382(10) |
| C(31)-C(36) | 1.377(8)  |
| C(31)-C(32) | 1.406(8)  |
| C(32)-C(33) | 1.411(10) |
| C(33)-C(34) | 1.355(11) |
| C(34)-C(35) | 1.400(11) |
| C(35)-C(36) | 1.398(9)  |
| C(41)-C(46) | 1.377(7)  |
| C(41)-C(42) | 1.382(8)  |
| C(42)-C(43) | 1.380(8)  |
| C(43)-C(44) | 1.357(11) |
| C(44)-C(45) | 1.366(11) |
| C(45)-C(46) | 1.398(8)  |
| C(51)-C(52) | 1.380(7)  |
| C(51)-C(56) | 1.390(7)  |
| C(52)-C(53) | 1.393(7)  |
| C(53)-C(54) | 1.352(8)  |
| C(54)-C(55) | 1.368(9)  |
| C(55)-C(56) | 1.365(8)  |
| C(61)-C(66) | 1.360(7)  |
| C(61)-C(62) | 1.381(7)  |
| F(62)-C(62) | 1.355(6)  |
| C(62)-C(63) | 1.369(7)  |
| F(63)-C(63) | 1.328(7)  |
| C(63)-C(64) | 1.387(9)  |
| C(64)-F(64) | 1.354(7)  |
| C(64)-C(65) | 1.388(9)  |
| C(65)-F(65) | 1.344(7)  |
| C(65)-C(66) | 1.372(8)  |
| F(66)-C(66) | 1.374(6)  |
| C(71)-C(72) | 1.386(7)  |
| C(71)-C(76) | 1.396(7)  |
| C(72)-C(73) | 1.372(7)  |
| C(73)-C(74) | 1.377(8)  |
| C(74)-C(75) | 1.389(8)  |
| C(75)-C(76) | 1.381(8)  |
| C(81)-C(86) | 1.378(7)  |
| C(81)-C(82) | 1.385(7)  |

|                   |            |
|-------------------|------------|
| C(82)-C(83)       | 1.377(7)   |
| C(83)-C(84)       | 1.344(9)   |
| C(84)-C(85)       | 1.374(9)   |
| C(85)-C(86)       | 1.396(8)   |
| C(91)-C(96)       | 1.377(8)   |
| C(91)-C(92)       | 1.379(7)   |
| C(92)-C(93)       | 1.395(7)   |
| C(93)-C(94)       | 1.378(9)   |
| C(94)-C(95)       | 1.373(10)  |
| C(95)-C(96)       | 1.382(9)   |
| C(101)-C(106)     | 1.375(8)   |
| C(101)-C(102)     | 1.393(7)   |
| C(102)-C(103)     | 1.381(8)   |
| C(103)-C(104)     | 1.351(9)   |
| C(104)-C(105)     | 1.363(9)   |
| C(105)-C(106)     | 1.417(8)   |
| O(200)-C(200)     | 1.580(19)  |
|                   |            |
| C(1)-Pt(1)-C(11)  | 176.0(2)   |
| C(1)-Pt(1)-P(2)   | 87.21(15)  |
| C(11)-Pt(1)-P(2)  | 91.30(14)  |
| C(1)-Pt(1)-P(1)   | 89.55(15)  |
| C(11)-Pt(1)-P(1)  | 92.05(14)  |
| P(2)-Pt(1)-P(1)   | 176.31(5)  |
| C(1)-Pt(1)-Pt(2)  | 14.16(15)  |
| C(11)-Pt(1)-Pt(2) | 161.86(13) |
| P(2)-Pt(1)-Pt(2)  | 80.16(3)   |
| P(1)-Pt(1)-Pt(2)  | 97.04(4)   |
| C(21)-P(1)-C(31)  | 108.3(3)   |
| C(21)-P(1)-C(1A)  | 106.3(3)   |
| C(31)-P(1)-C(1A)  | 104.3(3)   |
| C(21)-P(1)-Pt(1)  | 112.7(2)   |
| C(31)-P(1)-Pt(1)  | 114.7(2)   |
| C(1A)-P(1)-Pt(1)  | 110.0(2)   |
| C(2)-C(1)-Pt(1)   | 174.7(5)   |
| C(2B)-C(1B)-P(2)  | 116.6(4)   |
| C(2A)-C(1A)-P(1)  | 117.0(4)   |
| C(8)-Pt(2)-C(61)  | 179.8(2)   |

|                    |            |
|--------------------|------------|
| C(8)-Pt(2)-P(4)    | 86.90(13)  |
| C(61)-Pt(2)-P(4)   | 93.07(13)  |
| C(8)-Pt(2)-P(3)    | 87.83(13)  |
| C(61)-Pt(2)-P(3)   | 92.17(12)  |
| P(4)-Pt(2)-P(3)    | 171.02(5)  |
| C(8)-Pt(2)-Pt(1)   | 9.40(14)   |
| C(61)-Pt(2)-Pt(1)  | 170.39(13) |
| P(4)-Pt(2)-Pt(1)   | 88.46(3)   |
| P(3)-Pt(2)-Pt(1)   | 85.19(3)   |
| C(51)-P(2)-C(1B)   | 108.0(2)   |
| C(51)-P(2)-C(41)   | 104.8(2)   |
| C(1B)-P(2)-C(41)   | 102.6(2)   |
| C(51)-P(2)-Pt(1)   | 116.29(16) |
| C(1B)-P(2)-Pt(1)   | 110.71(17) |
| C(41)-P(2)-Pt(1)   | 113.38(18) |
| C(1)-C(2)-C(3)     | 175.1(6)   |
| C(1B)-C(2B)-C(3B)  | 112.4(5)   |
| C(1A)-C(2A)-C(3A)  | 110.2(6)   |
| C(71)-P(3)-C(81)   | 106.0(2)   |
| C(71)-P(3)-C(16B)  | 104.8(2)   |
| C(81)-P(3)-C(16B)  | 106.6(2)   |
| C(71)-P(3)-Pt(2)   | 108.18(16) |
| C(81)-P(3)-Pt(2)   | 115.66(15) |
| C(16B)-P(3)-Pt(2)  | 114.69(16) |
| C(4)-C(3)-C(2)     | 177.4(6)   |
| C(4A)-C(3A)-C(2A)  | 116.2(6)   |
| C(4B)-C(3B)-C(2B)  | 111.2(6)   |
| C(91)-P(4)-C(101)  | 105.7(2)   |
| C(91)-P(4)-C(16A)  | 108.5(2)   |
| C(101)-P(4)-C(16A) | 101.7(2)   |
| C(91)-P(4)-Pt(2)   | 113.83(17) |
| C(101)-P(4)-Pt(2)  | 110.80(17) |
| C(16A)-P(4)-Pt(2)  | 115.17(18) |
| C(3)-C(4)-C(5)     | 175.8(6)   |
| O(5A)-C(4A)-C(3A)  | 108.0(6)   |
| O(5B)-C(4B)-C(3B)  | 107.1(6)   |
| C(6)-C(5)-C(4)     | 174.4(6)   |
| C(4A)-O(5A)-C(6A)  | 116.2(6)   |

|                      |           |
|----------------------|-----------|
| C(4B)-O(5B)-C(6B)    | 114.9(6)  |
| C(5)-C(6)-C(7)       | 178.9(6)  |
| O(5B)-C(6B)-C(7B)    | 108.4(7)  |
| O(5A)-C(6A)-C(7A)    | 113.7(7)  |
| C(8)-C(7)-C(6)       | 177.3(6)  |
| C(6A)-C(7A)-C(8A)    | 109.7(8)  |
| C(8B)-C(7B)-C(6B)    | 108.4(8)  |
| C(7)-C(8)-Pt(2)      | 175.1(4)  |
| C(7B)-C(8B)-C(9B)    | 112.2(8)  |
| C(9A)-C(8A)-C(7A)    | 117.7(9)  |
| C(10B)-C(9B)-C(8B)   | 114.0(7)  |
| C(8A)-C(9A)-C(10A)   | 115.7(11) |
| C(9B)-C(10B)-C(11B)  | 112.7(7)  |
| C(9A)-C(10A)-C(11A)  | 114.5(8)  |
| C(12)-C(11)-C(16)    | 113.6(5)  |
| C(12)-C(11)-Pt(1)    | 125.6(4)  |
| C(16)-C(11)-Pt(1)    | 120.8(4)  |
| O(12A)-C(11A)-C(10A) | 107.8(5)  |
| O(12B)-C(11B)-C(10B) | 109.6(6)  |
| F(12)-C(12)-C(11)    | 119.2(5)  |
| F(12)-C(12)-C(13)    | 116.9(5)  |
| C(11)-C(12)-C(13)    | 123.8(5)  |
| C(13A)-O(12A)-C(11A) | 114.0(5)  |
| C(13B)-O(12B)-C(11B) | 110.3(5)  |
| F(13)-C(13)-C(14)    | 119.7(6)  |
| F(13)-C(13)-C(12)    | 120.9(6)  |
| C(14)-C(13)-C(12)    | 119.4(5)  |
| O(12A)-C(13A)-C(14A) | 108.6(5)  |
| O(12B)-C(13B)-C(14B) | 107.8(5)  |
| F(14)-C(14)-C(15)    | 120.4(5)  |
| F(14)-C(14)-C(13)    | 120.3(5)  |
| C(15)-C(14)-C(13)    | 119.2(5)  |
| C(13B)-C(14B)-C(15B) | 115.4(5)  |
| C(13A)-C(14A)-C(15A) | 114.7(5)  |
| F(15)-C(15)-C(14)    | 120.1(5)  |
| F(15)-C(15)-C(16)    | 120.6(5)  |
| C(14)-C(15)-C(16)    | 119.3(5)  |
| C(16B)-C(15B)-C(14B) | 112.3(4)  |

|                      |          |
|----------------------|----------|
| C(16A)-C(15A)-C(14A) | 112.0(5) |
| C(15)-C(16)-F(16)    | 116.7(5) |
| C(15)-C(16)-C(11)    | 124.6(5) |
| F(16)-C(16)-C(11)    | 118.6(4) |
| C(15B)-C(16B)-P(3)   | 117.6(4) |
| C(15A)-C(16A)-P(4)   | 116.7(4) |
| C(26)-C(21)-C(22)    | 120.1(6) |
| C(26)-C(21)-P(1)     | 118.0(5) |
| C(22)-C(21)-P(1)     | 120.6(5) |
| C(23)-C(22)-C(21)    | 119.8(7) |
| C(24)-C(23)-C(22)    | 118.9(7) |
| C(23)-C(24)-C(25)    | 120.6(7) |
| C(26)-C(25)-C(24)    | 120.5(8) |
| C(21)-C(26)-C(25)    | 119.9(7) |
| C(36)-C(31)-C(32)    | 118.3(6) |
| C(36)-C(31)-P(1)     | 119.9(5) |
| C(32)-C(31)-P(1)     | 121.3(5) |
| C(31)-C(32)-C(33)    | 119.5(7) |
| C(34)-C(33)-C(32)    | 122.0(8) |
| C(33)-C(34)-C(35)    | 118.6(8) |
| C(36)-C(35)-C(34)    | 120.3(8) |
| C(31)-C(36)-C(35)    | 121.4(7) |
| C(46)-C(41)-C(42)    | 120.5(5) |
| C(46)-C(41)-P(2)     | 120.4(4) |
| C(42)-C(41)-P(2)     | 119.0(4) |
| C(43)-C(42)-C(41)    | 119.1(6) |
| C(44)-C(43)-C(42)    | 120.7(8) |
| C(43)-C(44)-C(45)    | 120.8(7) |
| C(44)-C(45)-C(46)    | 119.5(7) |
| C(41)-C(46)-C(45)    | 119.3(6) |
| C(52)-C(51)-C(56)    | 117.4(5) |
| C(52)-C(51)-P(2)     | 122.1(4) |
| C(56)-C(51)-P(2)     | 120.4(4) |
| C(51)-C(52)-C(53)    | 120.6(5) |
| C(54)-C(53)-C(52)    | 120.3(6) |
| C(53)-C(54)-C(55)    | 120.1(6) |
| C(56)-C(55)-C(54)    | 120.0(6) |
| C(55)-C(56)-C(51)    | 121.6(6) |

|                   |          |
|-------------------|----------|
| C(66)-C(61)-C(62) | 112.7(5) |
| C(66)-C(61)-Pt(2) | 123.9(4) |
| C(62)-C(61)-Pt(2) | 123.3(4) |
| F(62)-C(62)-C(63) | 114.7(5) |
| F(62)-C(62)-C(61) | 119.3(4) |
| C(63)-C(62)-C(61) | 126.0(6) |
| F(63)-C(63)-C(62) | 123.3(6) |
| F(63)-C(63)-C(64) | 119.3(6) |
| C(62)-C(63)-C(64) | 117.5(6) |
| F(64)-C(64)-C(63) | 120.8(7) |
| F(64)-C(64)-C(65) | 119.3(7) |
| C(63)-C(64)-C(65) | 119.8(6) |
| F(65)-C(65)-C(66) | 122.2(7) |
| F(65)-C(65)-C(64) | 120.1(6) |
| C(66)-C(65)-C(64) | 117.7(6) |
| C(61)-C(66)-C(65) | 126.2(6) |
| C(61)-C(66)-F(66) | 119.3(5) |
| C(65)-C(66)-F(66) | 114.5(5) |
| C(72)-C(71)-C(76) | 118.0(5) |
| C(72)-C(71)-P(3)  | 123.0(4) |
| C(76)-C(71)-P(3)  | 119.0(4) |
| C(73)-C(72)-C(71) | 121.3(6) |
| C(72)-C(73)-C(74) | 121.1(5) |
| C(73)-C(74)-C(75) | 118.0(5) |
| C(76)-C(75)-C(74) | 121.5(6) |
| C(75)-C(76)-C(71) | 120.0(5) |
| C(86)-C(81)-C(82) | 118.6(5) |
| C(86)-C(81)-P(3)  | 119.6(4) |
| C(82)-C(81)-P(3)  | 121.5(4) |
| C(83)-C(82)-C(81) | 120.2(6) |
| C(84)-C(83)-C(82) | 120.9(6) |
| C(83)-C(84)-C(85) | 120.7(6) |
| C(84)-C(85)-C(86) | 119.0(6) |
| C(81)-C(86)-C(85) | 120.6(6) |
| C(96)-C(91)-C(92) | 119.7(5) |
| C(96)-C(91)-P(4)  | 119.4(4) |
| C(92)-C(91)-P(4)  | 120.7(4) |
| C(91)-C(92)-C(93) | 120.5(6) |



|                      |          |
|----------------------|----------|
| C(94)-C(93)-C(92)    | 119.5(6) |
| C(95)-C(94)-C(93)    | 119.5(6) |
| C(94)-C(95)-C(96)    | 121.3(7) |
| C(91)-C(96)-C(95)    | 119.5(6) |
| C(106)-C(101)-C(102) | 117.6(5) |
| C(106)-C(101)-P(4)   | 119.9(4) |
| C(102)-C(101)-P(4)   | 122.5(5) |
| C(103)-C(102)-C(101) | 120.6(6) |
| C(104)-C(103)-C(102) | 122.0(6) |
| C(103)-C(104)-C(105) | 118.8(6) |
| C(104)-C(105)-C(106) | 120.5(7) |
| C(101)-C(106)-C(105) | 120.5(6) |

---

Table S16. Anisotropic displacement parameters ( $\text{\AA}^2 \times 10^3$ ) for **6**. The anisotropic displacement factor exponent takes the form:  $-2\pi^2[h^2a^*2U^{11} + \dots + 2hka^*b^*U^{12}]$

|        | U <sup>11</sup> | U <sup>22</sup> | U <sup>33</sup> | U <sup>23</sup> | U <sup>13</sup> | U <sup>12</sup> |
|--------|-----------------|-----------------|-----------------|-----------------|-----------------|-----------------|
| Pt(1)  | 52(1)           | 29(1)           | 39(1)           | 3(1)            | 6(1)            | 2(1)            |
| P(1)   | 64(1)           | 42(1)           | 42(1)           | -1(1)           | 10(1)           | -5(1)           |
| C(1)   | 60(3)           | 44(3)           | 37(3)           | 0(2)            | 11(2)           | 9(3)            |
| C(1B)  | 55(3)           | 39(3)           | 49(3)           | 2(2)            | 6(2)            | 11(2)           |
| C(1A)  | 67(4)           | 51(4)           | 65(4)           | -1(3)           | 5(3)            | 2(3)            |
| Pt(2)  | 38(1)           | 36(1)           | 33(1)           | 5(1)            | 10(1)           | 5(1)            |
| P(2)   | 49(1)           | 30(1)           | 39(1)           | 3(1)            | 5(1)            | 2(1)            |
| C(2)   | 66(3)           | 37(3)           | 42(3)           | 0(2)            | 10(3)           | 3(3)            |
| C(2B)  | 57(3)           | 55(4)           | 73(4)           | 8(3)            | -7(3)           | 3(3)            |
| C(2A)  | 109(5)          | 59(4)           | 45(4)           | -9(3)           | 3(3)            | 3(4)            |
| P(3)   | 38(1)           | 36(1)           | 38(1)           | 4(1)            | 12(1)           | 5(1)            |
| C(3)   | 62(3)           | 41(3)           | 40(3)           | -3(2)           | 7(2)            | 8(3)            |
| C(3A)  | 132(7)          | 62(5)           | 75(5)           | -24(4)          | -47(5)          | 20(4)           |
| C(3B)  | 64(4)           | 67(4)           | 100(6)          | -13(4)          | -4(4)           | 8(3)            |
| P(4)   | 47(1)           | 51(1)           | 35(1)           | 2(1)            | 13(1)           | 6(1)            |
| C(4)   | 71(4)           | 34(3)           | 45(3)           | 2(2)            | 11(3)           | 5(3)            |
| C(4A)  | 68(4)           | 78(5)           | 101(6)          | -20(4)          | -11(4)          | -7(4)           |
| C(4B)  | 103(6)          | 87(6)           | 87(6)           | -18(4)          | -22(4)          | 40(5)           |
| C(5)   | 65(3)           | 34(3)           | 55(4)           | 1(3)            | 17(3)           | 10(3)           |
| O(5A)  | 100(4)          | 87(4)           | 86(4)           | 11(3)           | 19(3)           | 5(3)            |
| O(5B)  | 92(3)           | 76(3)           | 103(4)          | -10(3)          | -19(3)          | 33(3)           |
| C(6)   | 57(3)           | 37(3)           | 49(3)           | 0(3)            | 16(3)           | 7(3)            |
| C(6B)  | 141(8)          | 66(5)           | 119(7)          | -9(5)           | -9(6)           | 25(5)           |
| C(6A)  | 119(7)          | 133(8)          | 92(7)           | 28(6)           | 18(5)           | -3(6)           |
| C(7)   | 53(3)           | 42(3)           | 48(3)           | 2(3)            | 18(3)           | 7(3)            |
| C(7A)  | 120(7)          | 113(7)          | 118(8)          | 38(6)           | 32(6)           | -2(6)           |
| C(7B)  | 136(8)          | 99(7)           | 148(9)          | -49(6)          | 14(7)           | 29(6)           |
| C(8)   | 45(3)           | 47(3)           | 41(3)           | 3(2)            | 20(2)           | 4(2)            |
| C(8B)  | 122(7)          | 82(6)           | 116(7)          | -11(5)          | -7(6)           | 28(5)           |
| C(8A)  | 95(7)           | 148(10)         | 209(13)         | 101(9)          | -20(7)          | -34(6)          |
| C(9B)  | 109(6)          | 80(6)           | 124(8)          | -25(5)          | 21(6)           | 4(5)            |
| C(9A)  | 182(11)         | 189(12)         | 103(8)          | 53(8)           | 57(8)           | 77(10)          |
| C(10B) | 101(6)          | 83(6)           | 121(8)          | -4(5)           | 15(5)           | -4(5)           |

|        |        |        |        |        |        |        |
|--------|--------|--------|--------|--------|--------|--------|
| C(10A) | 188(9) | 117(7) | 68(5)  | 28(5)  | 55(6)  | 56(7)  |
| C(11)  | 47(3)  | 36(3)  | 39(3)  | 2(2)   | 4(2)   | 1(2)   |
| C(11A) | 82(5)  | 67(4)  | 79(5)  | 27(4)  | 10(4)  | 11(4)  |
| C(11B) | 103(6) | 62(4)  | 103(6) | 1(4)   | 32(5)  | 14(4)  |
| C(12)  | 47(3)  | 46(3)  | 80(4)  | 14(3)  | 2(3)   | -3(3)  |
| F(12)  | 47(2)  | 69(2)  | 158(4) | 31(2)  | -10(2) | -4(2)  |
| O(12A) | 82(3)  | 53(2)  | 66(3)  | 3(2)   | 16(2)  | 10(2)  |
| O(12B) | 77(3)  | 53(3)  | 89(3)  | 7(2)   | 22(2)  | 1(2)   |
| F(13)  | 81(3)  | 72(3)  | 229(6) | 51(3)  | -12(3) | 24(2)  |
| C(13)  | 64(4)  | 52(4)  | 102(6) | 18(4)  | 0(4)   | 24(3)  |
| C(13A) | 59(3)  | 56(4)  | 69(4)  | -7(3)  | 14(3)  | -1(3)  |
| C(13B) | 58(3)  | 64(4)  | 59(4)  | 15(3)  | 10(3)  | -2(3)  |
| C(14)  | 76(4)  | 30(3)  | 81(5)  | 16(3)  | 10(3)  | 1(3)   |
| F(14)  | 124(3) | 37(2)  | 138(4) | 23(2)  | 18(3)  | 1(2)   |
| C(14B) | 70(4)  | 60(4)  | 35(3)  | 2(3)   | 13(3)  | -14(3) |
| C(14A) | 38(3)  | 74(4)  | 71(4)  | 2(3)   | 16(3)  | 2(3)   |
| C(15)  | 61(3)  | 40(3)  | 71(4)  | -2(3)  | 17(3)  | -12(3) |
| F(15)  | 80(2)  | 52(2)  | 161(4) | 9(2)   | 22(3)  | -26(2) |
| C(15B) | 61(3)  | 50(3)  | 44(3)  | 6(2)   | 25(3)  | 3(3)   |
| C(15A) | 50(3)  | 69(4)  | 60(4)  | -4(3)  | 20(3)  | 1(3)   |
| F(16)  | 46(2)  | 56(2)  | 145(4) | 17(2)  | 9(2)   | -4(2)  |
| C(16)  | 45(3)  | 42(3)  | 52(3)  | 4(2)   | 8(2)   | -1(3)  |
| C(16B) | 54(3)  | 43(3)  | 34(3)  | 7(2)   | 11(2)  | 4(2)   |
| C(16A) | 50(3)  | 64(4)  | 50(3)  | -11(3) | 16(3)  | 3(3)   |
| C(21)  | 87(4)  | 57(4)  | 35(3)  | 6(3)   | 6(3)   | 3(3)   |
| C(22)  | 97(5)  | 57(4)  | 54(4)  | 2(3)   | 21(3)  | -6(4)  |
| C(23)  | 125(7) | 63(5)  | 77(5)  | 12(4)  | 25(5)  | -5(4)  |
| C(24)  | 140(8) | 71(5)  | 84(6)  | 31(4)  | 0(5)   | 5(5)   |
| C(25)  | 137(8) | 102(7) | 104(7) | 34(5)  | -39(6) | -3(6)  |
| C(26)  | 107(6) | 66(5)  | 85(5)  | 31(4)  | -23(4) | -7(4)  |
| C(31)  | 63(4)  | 51(3)  | 60(4)  | -6(3)  | 16(3)  | -5(3)  |
| C(32)  | 87(5)  | 80(5)  | 81(5)  | -3(4)  | 29(4)  | -6(4)  |
| C(33)  | 96(6)  | 101(6) | 110(7) | -24(5) | 46(5)  | 5(5)   |
| C(34)  | 82(5)  | 82(6)  | 127(8) | -9(5)  | 14(5)  | 10(4)  |
| C(35)  | 81(5)  | 93(6)  | 108(7) | 5(5)   | 17(5)  | 8(4)   |
| C(36)  | 55(4)  | 72(4)  | 81(5)  | 7(4)   | 14(3)  | 6(3)   |
| C(41)  | 54(3)  | 32(3)  | 52(3)  | 4(2)   | 11(3)  | 2(2)   |
| C(42)  | 61(4)  | 53(4)  | 74(4)  | -14(3) | 16(3)  | -6(3)  |

|       |        |        |         |        |        |        |
|-------|--------|--------|---------|--------|--------|--------|
| C(43) | 65(4)  | 68(5)  | 141(8)  | -20(5) | 31(5)  | -19(4) |
| C(44) | 74(5)  | 57(5)  | 172(10) | 1(5)   | 53(6)  | -13(4) |
| C(45) | 78(5)  | 71(5)  | 124(7)  | 48(5)  | 49(5)  | 18(4)  |
| C(46) | 61(4)  | 59(4)  | 61(4)   | 14(3)  | 15(3)  | 6(3)   |
| C(51) | 58(3)  | 37(3)  | 35(3)   | 3(2)   | 6(2)   | 7(2)   |
| C(52) | 61(3)  | 40(3)  | 61(4)   | -1(3)  | 4(3)   | 2(3)   |
| C(53) | 82(4)  | 36(3)  | 70(4)   | -4(3)  | 13(3)  | -9(3)  |
| C(54) | 100(5) | 34(3)  | 78(5)   | -6(3)  | 9(4)   | 17(3)  |
| C(55) | 79(5)  | 42(4)  | 132(7)  | -9(4)  | 7(4)   | 21(3)  |
| C(56) | 58(4)  | 46(3)  | 102(5)  | -10(3) | 3(3)   | 7(3)   |
| C(61) | 39(3)  | 43(3)  | 34(3)   | 8(2)   | 11(2)  | 5(2)   |
| F(62) | 72(2)  | 54(2)  | 68(2)   | -4(2)  | 13(2)  | -15(2) |
| C(62) | 49(3)  | 42(3)  | 49(3)   | 11(2)  | 19(3)  | -1(2)  |
| F(63) | 107(3) | 37(2)  | 147(4)  | 17(2)  | 49(3)  | -2(2)  |
| C(63) | 71(4)  | 39(3)  | 88(5)   | 15(3)  | 35(4)  | 4(3)   |
| C(64) | 78(5)  | 60(4)  | 98(6)   | 41(4)  | 30(4)  | 19(4)  |
| F(64) | 125(4) | 91(3)  | 154(4)  | 81(3)  | 31(3)  | 46(3)  |
| C(65) | 63(4)  | 88(5)  | 59(4)   | 28(4)  | 2(3)   | 19(4)  |
| F(65) | 92(3)  | 129(4) | 86(3)   | 41(3)  | -22(2) | 21(3)  |
| F(66) | 69(2)  | 66(2)  | 59(2)   | -2(2)  | -10(2) | -1(2)  |
| C(66) | 57(3)  | 47(3)  | 56(4)   | 8(3)   | 15(3)  | 5(3)   |
| C(71) | 40(3)  | 43(3)  | 39(3)   | 9(2)   | 11(2)  | -1(2)  |
| C(72) | 45(3)  | 59(4)  | 52(3)   | 7(3)   | 12(3)  | 2(3)   |
| C(73) | 43(3)  | 72(4)  | 68(4)   | 13(3)  | 15(3)  | -3(3)  |
| C(74) | 48(3)  | 73(4)  | 72(4)   | 14(3)  | 7(3)   | -16(3) |
| C(75) | 75(4)  | 56(4)  | 73(5)   | -11(3) | 15(3)  | -18(3) |
| C(76) | 55(3)  | 52(3)  | 68(4)   | 0(3)   | 22(3)  | -3(3)  |
| C(81) | 46(3)  | 41(3)  | 49(3)   | 9(2)   | 22(2)  | 8(2)   |
| C(82) | 68(4)  | 41(3)  | 49(3)   | -2(3)  | 17(3)  | -5(3)  |
| C(83) | 106(5) | 40(3)  | 71(5)   | -4(3)  | 36(4)  | -5(4)  |
| C(84) | 110(6) | 38(3)  | 98(6)   | 3(4)   | 66(5)  | 8(4)   |
| C(85) | 66(4)  | 58(4)  | 97(5)   | 28(4)  | 37(4)  | 21(3)  |
| C(86) | 52(3)  | 51(3)  | 72(4)   | 12(3)  | 17(3)  | 10(3)  |
| C(91) | 54(3)  | 58(3)  | 36(3)   | 2(2)   | 21(2)  | 1(3)   |
| C(92) | 78(4)  | 50(3)  | 38(3)   | 3(3)   | 13(3)  | 5(3)   |
| C(93) | 112(5) | 57(4)  | 42(4)   | 10(3)  | 17(3)  | 12(4)  |
| C(94) | 151(7) | 70(5)  | 55(5)   | 12(4)  | 42(5)  | -4(5)  |
| C(95) | 128(6) | 63(4)  | 71(5)   | 2(4)   | 40(5)  | -28(4) |

|        |         |         |         |          |        |        |
|--------|---------|---------|---------|----------|--------|--------|
| C(96)  | 86(4)   | 64(4)   | 56(4)   | 2(3)     | 26(3)  | -20(3) |
| C(101) | 70(4)   | 45(3)   | 34(3)   | 3(2)     | 14(3)  | 16(3)  |
| C(102) | 75(4)   | 64(4)   | 45(3)   | 8(3)     | 13(3)  | 11(3)  |
| C(103) | 105(5)  | 50(4)   | 52(4)   | -6(3)    | 5(4)   | 18(4)  |
| C(104) | 103(6)  | 53(4)   | 74(5)   | -14(3)   | 9(4)   | -9(4)  |
| C(105) | 90(5)   | 67(4)   | 91(5)   | -24(4)   | 13(4)  | -23(4) |
| C(106) | 75(4)   | 57(4)   | 69(4)   | -13(3)   | 23(3)  | -4(3)  |
| O(200) | 117(6)  | 343(15) | 350(17) | -145(13) | -28(8) | -8(8)  |
| C(200) | 330(30) | 830(60) | 135(13) | -240(20) | 81(15) | 30(30) |

---

Table S17. Hydrogen coordinates ( $\times 10^4$ ) and isotropic displacement parameters ( $\text{\AA}^2 \times 10^3$ ) for **6**.

|        | x    | y     | z     | U(eq) |
|--------|------|-------|-------|-------|
| H(1BA) | 7944 | -6255 | -558  | 58    |
| H(1BB) | 7967 | -6986 | -926  | 58    |
| H(1AA) | 8958 | -5946 | 2069  | 74    |
| H(1AB) | 8416 | -5427 | 1716  | 74    |
| H(2BA) | 7130 | -6883 | -154  | 78    |
| H(2BB) | 7103 | -7497 | -637  | 78    |
| H(2AA) | 8382 | -5900 | 2830  | 88    |
| H(2AB) | 7942 | -5269 | 2478  | 88    |
| H(3AA) | 8754 | -4662 | 3111  | 120   |
| H(3AB) | 9290 | -5162 | 2924  | 120   |
| H(3BA) | 6844 | -6473 | -1327 | 96    |
| H(3BB) | 6287 | -6690 | -1005 | 96    |
| H(4AA) | 9327 | -3971 | 2566  | 104   |
| H(4AB) | 9118 | -4541 | 2050  | 104   |
| H(4BA) | 6605 | -5698 | -366  | 118   |
| H(4BB) | 7143 | -5472 | -711  | 118   |
| H(6BA) | 5975 | -4256 | -1360 | 136   |
| H(6BB) | 6644 | -4303 | -917  | 136   |
| H(6AA) | 7893 | -3312 | 1574  | 138   |
| H(6AB) | 8424 | -3822 | 1386  | 138   |
| H(7AA) | 9213 | -3027 | 1838  | 139   |
| H(7AB) | 8684 | -2518 | 2035  | 139   |
| H(7BA) | 5458 | -4746 | -565  | 156   |
| H(7BB) | 6125 | -4569 | -144  | 156   |
| H(8BA) | 5368 | -3492 | -840  | 134   |
| H(8BB) | 6036 | -3314 | -428  | 134   |
| H(8AA) | 8600 | -2798 | 845   | 190   |
| H(8AB) | 8243 | -2151 | 1106  | 190   |
| H(9BA) | 5175 | -2954 | -7    | 126   |
| H(9BB) | 4911 | -3789 | -56   | 126   |
| H(9AA) | 9502 | -2219 | 1101  | 185   |
| H(9AB) | 9156 | -1576 | 1380  | 185   |
| H(10A) | 5802 | -4187 | 592   | 124   |

|        |       |       |       |     |
|--------|-------|-------|-------|-----|
| H(10B) | 5431  | -3552 | 858   | 124 |
| H(10C) | 9245  | -1098 | 545   | 145 |
| H(10D) | 8514  | -1345 | 449   | 145 |
| H(11A) | 9443  | -2279 | 102   | 92  |
| H(11B) | 8681  | -2355 | -87   | 92  |
| H(11C) | 6542  | -3346 | 1084  | 105 |
| H(11D) | 6556  | -3295 | 426   | 105 |
| H(13A) | 8745  | -2217 | -1072 | 73  |
| H(13B) | 9507  | -2137 | -901  | 73  |
| H(13C) | 6973  | -2066 | 581   | 73  |
| H(13D) | 6942  | -2138 | 1235  | 73  |
| H(14A) | 6893  | -879  | 974   | 66  |
| H(14B) | 6248  | -1120 | 1159  | 66  |
| H(14C) | 9224  | -1514 | -1730 | 72  |
| H(14D) | 9388  | -884  | -1256 | 72  |
| H(15A) | 5732  | -1202 | 184   | 60  |
| H(15B) | 5970  | -375  | 364   | 60  |
| H(15C) | 8216  | -830  | -1296 | 70  |
| H(15D) | 8474  | -445  | -1802 | 70  |
| H(16A) | 6661  | -1386 | -196  | 52  |
| H(16B) | 6876  | -552  | -32   | 52  |
| H(16C) | 7989  | -1920 | -1866 | 64  |
| H(16D) | 8183  | -1470 | -2373 | 64  |
| H(22A) | 7386  | -7881 | 2150  | 82  |
| H(23A) | 7751  | -8952 | 2686  | 105 |
| H(24A) | 8838  | -9083 | 3060  | 122 |
| H(25A) | 9533  | -8097 | 3015  | 148 |
| H(26A) | 9191  | -7076 | 2438  | 110 |
| H(32A) | 7226  | -6503 | 2560  | 97  |
| H(33A) | 6206  | -6000 | 2530  | 118 |
| H(34A) | 5566  | -5630 | 1693  | 118 |
| H(35A) | 5954  | -5733 | 853   | 113 |
| H(36A) | 6980  | -6190 | 877   | 83  |
| H(42A) | 9518  | -6421 | 720   | 75  |
| H(43A) | 10440 | -5816 | 591   | 108 |
| H(44A) | 10656 | -5697 | -295  | 117 |
| H(45A) | 10006 | -6256 | -1064 | 104 |
| H(46A) | 9107  | -6941 | -938  | 72  |

|        |      |        |       |     |
|--------|------|--------|-------|-----|
| H(52A) | 7669 | -8447  | -407  | 66  |
| H(53A) | 7838 | -9712  | -544  | 75  |
| H(54A) | 8858 | -10182 | -399  | 86  |
| H(55A) | 9725 | -9406  | -96   | 104 |
| H(56A) | 9570 | -8154  | 30    | 85  |
| H(72A) | 4812 | -513   | -615  | 62  |
| H(73A) | 3906 | -1233  | -852  | 73  |
| H(74A) | 3898 | -2302  | -1401 | 78  |
| H(75A) | 4842 | -2654  | -1677 | 81  |
| H(76A) | 5751 | -1919  | -1461 | 68  |
| H(82A) | 6531 | 677    | -109  | 62  |
| H(83A) | 6246 | 1920   | -88   | 84  |
| H(84A) | 5387 | 2377   | -712  | 91  |
| H(85A) | 4789 | 1607   | -1394 | 85  |
| H(86A) | 5082 | 352    | -1437 | 69  |
| H(92A) | 6539 | -993   | -3439 | 66  |
| H(93A) | 6402 | -39    | -4113 | 84  |
| H(94A) | 6926 | 1095   | -3895 | 107 |
| H(95A) | 7579 | 1265   | -3015 | 101 |
| H(96A) | 7718 | 322    | -2343 | 80  |
| H(10E) | 7527 | -2317  | -2960 | 73  |
| H(10F) | 7027 | -3371  | -3387 | 85  |
| H(10G) | 5990 | -3649  | -3349 | 94  |
| H(10H) | 5447 | -2885  | -2837 | 100 |
| H(10I) | 5946 | -1818  | -2378 | 79  |
| H(20D) | 5444 | -5510  | -1558 | 422 |
| H(20A) | 5302 | -5314  | -2697 | 643 |
| H(20B) | 5923 | -5111  | -2257 | 643 |
| H(20C) | 5752 | -5947  | -2399 | 643 |

---



Table S18. Torsion angles [°] for **6**.

---

|                         |            |
|-------------------------|------------|
| C(1)-Pt(1)-P(1)-C(21)   | -163.2(3)  |
| C(11)-Pt(1)-P(1)-C(21)  | 20.5(3)    |
| P(2)-Pt(1)-P(1)-C(21)   | -134.9(8)  |
| Pt(2)-Pt(1)-P(1)-C(21)  | -175.3(2)  |
| C(1)-Pt(1)-P(1)-C(31)   | 72.3(3)    |
| C(11)-Pt(1)-P(1)-C(31)  | -104.0(2)  |
| P(2)-Pt(1)-P(1)-C(31)   | 100.6(8)   |
| Pt(2)-Pt(1)-P(1)-C(31)  | 60.2(2)    |
| C(1)-Pt(1)-P(1)-C(1A)   | -44.8(3)   |
| C(11)-Pt(1)-P(1)-C(1A)  | 138.8(2)   |
| P(2)-Pt(1)-P(1)-C(1A)   | -16.5(8)   |
| Pt(2)-Pt(1)-P(1)-C(1A)  | -56.9(2)   |
| C(11)-Pt(1)-C(1)-C(2)   | -4(7)      |
| P(2)-Pt(1)-C(1)-C(2)    | 65(5)      |
| P(1)-Pt(1)-C(1)-C(2)    | -117(5)    |
| Pt(2)-Pt(1)-C(1)-C(2)   | 5(5)       |
| C(21)-P(1)-C(1A)-C(2A)  | -63.0(5)   |
| C(31)-P(1)-C(1A)-C(2A)  | 51.3(5)    |
| Pt(1)-P(1)-C(1A)-C(2A)  | 174.7(4)   |
| C(1)-Pt(1)-Pt(2)-C(8)   | 27.2(10)   |
| C(11)-Pt(1)-Pt(2)-C(8)  | -154.8(9)  |
| P(2)-Pt(1)-Pt(2)-C(8)   | -91.9(8)   |
| P(1)-Pt(1)-Pt(2)-C(8)   | 85.7(8)    |
| C(1)-Pt(1)-Pt(2)-C(61)  | -153.2(10) |
| C(11)-Pt(1)-Pt(2)-C(61) | 24.9(9)    |
| P(2)-Pt(1)-Pt(2)-C(61)  | 87.8(8)    |
| P(1)-Pt(1)-Pt(2)-C(61)  | -94.7(8)   |
| C(1)-Pt(1)-Pt(2)-P(4)   | 107.5(6)   |
| C(11)-Pt(1)-Pt(2)-P(4)  | -74.4(4)   |
| P(2)-Pt(1)-Pt(2)-P(4)   | -11.55(5)  |
| P(1)-Pt(1)-Pt(2)-P(4)   | 166.03(5)  |
| C(1)-Pt(1)-Pt(2)-P(3)   | -78.8(6)   |
| C(11)-Pt(1)-Pt(2)-P(3)  | 99.2(4)    |
| P(2)-Pt(1)-Pt(2)-P(3)   | 162.11(5)  |
| P(1)-Pt(1)-Pt(2)-P(3)   | -20.32(5)  |
| C(2B)-C(1B)-P(2)-C(51)  | 79.9(5)    |

|                         |             |
|-------------------------|-------------|
| C(2B)-C(1B)-P(2)-C(41)  | -169.8(4)   |
| C(2B)-C(1B)-P(2)-Pt(1)  | -48.5(4)    |
| C(1)-Pt(1)-P(2)-C(51)   | -176.1(2)   |
| C(11)-Pt(1)-P(2)-C(51)  | 0.2(2)      |
| P(1)-Pt(1)-P(2)-C(51)   | 155.5(8)    |
| Pt(2)-Pt(1)-P(2)-C(51)  | -163.72(19) |
| C(1)-Pt(1)-P(2)-C(1B)   | -52.3(2)    |
| C(11)-Pt(1)-P(2)-C(1B)  | 123.9(2)    |
| P(1)-Pt(1)-P(2)-C(1B)   | -80.7(8)    |
| Pt(2)-Pt(1)-P(2)-C(1B)  | -39.96(18)  |
| C(1)-Pt(1)-P(2)-C(41)   | 62.4(2)     |
| C(11)-Pt(1)-P(2)-C(41)  | -121.3(2)   |
| P(1)-Pt(1)-P(2)-C(41)   | 34.0(8)     |
| Pt(2)-Pt(1)-P(2)-C(41)  | 74.74(17)   |
| Pt(1)-C(1)-C(2)-C(3)    | 7(11)       |
| P(2)-C(1B)-C(2B)-C(3B)  | 167.5(4)    |
| P(1)-C(1A)-C(2A)-C(3A)  | 169.3(4)    |
| C(8)-Pt(2)-P(3)-C(71)   | -85.5(2)    |
| C(61)-Pt(2)-P(3)-C(71)  | 94.3(2)     |
| P(4)-Pt(2)-P(3)-C(71)   | -31.4(4)    |
| Pt(1)-Pt(2)-P(3)-C(71)  | -76.47(16)  |
| C(8)-Pt(2)-P(3)-C(81)   | 155.8(2)    |
| C(61)-Pt(2)-P(3)-C(81)  | -24.4(2)    |
| P(4)-Pt(2)-P(3)-C(81)   | -150.1(3)   |
| Pt(1)-Pt(2)-P(3)-C(81)  | 164.85(19)  |
| C(8)-Pt(2)-P(3)-C(16B)  | 31.1(2)     |
| C(61)-Pt(2)-P(3)-C(16B) | -149.1(2)   |
| P(4)-Pt(2)-P(3)-C(16B)  | 85.2(3)     |
| Pt(1)-Pt(2)-P(3)-C(16B) | 40.13(19)   |
| C(1)-C(2)-C(3)-C(4)     | -39(18)     |
| C(1A)-C(2A)-C(3A)-C(4A) | 51.3(8)     |
| C(1B)-C(2B)-C(3B)-C(4B) | -74.3(8)    |
| C(8)-Pt(2)-P(4)-C(91)   | -170.2(2)   |
| C(61)-Pt(2)-P(4)-C(91)  | 10.0(2)     |
| P(3)-Pt(2)-P(4)-C(91)   | 135.6(3)    |
| Pt(1)-Pt(2)-P(4)-C(91)  | -179.48(19) |
| C(8)-Pt(2)-P(4)-C(101)  | 70.8(2)     |
| C(61)-Pt(2)-P(4)-C(101) | -108.9(2)   |

|                            |            |
|----------------------------|------------|
| P(3)-Pt(2)-P(4)-C(101)     | 16.7(4)    |
| Pt(1)-Pt(2)-P(4)-C(101)    | 61.56(18)  |
| C(8)-Pt(2)-P(4)-C(16A)     | -43.9(3)   |
| C(61)-Pt(2)-P(4)-C(16A)    | 136.3(3)   |
| P(3)-Pt(2)-P(4)-C(16A)     | -98.1(4)   |
| Pt(1)-Pt(2)-P(4)-C(16A)    | -53.2(2)   |
| C(2)-C(3)-C(4)-C(5)        | 6(20)      |
| C(2A)-C(3A)-C(4A)-O(5A)    | 61.4(8)    |
| C(2B)-C(3B)-C(4B)-O(5B)    | -177.8(6)  |
| C(3)-C(4)-C(5)-C(6)        | -11(13)    |
| C(3A)-C(4A)-O(5A)-C(6A)    | -160.6(7)  |
| C(3B)-C(4B)-O(5B)-C(6B)    | -175.9(7)  |
| C(4)-C(5)-C(6)-C(7)        | 105(36)    |
| C(4B)-O(5B)-C(6B)-C(7B)    | -75.6(9)   |
| C(4A)-O(5A)-C(6A)-C(7A)    | -68.1(10)  |
| C(5)-C(6)-C(7)-C(8)        | 23(46)     |
| O(5A)-C(6A)-C(7A)-C(8A)    | -179.3(8)  |
| O(5B)-C(6B)-C(7B)-C(8B)    | -165.5(7)  |
| C(6)-C(7)-C(8)-Pt(2)       | -23(18)    |
| C(61)-Pt(2)-C(8)-C(7)      | -63(60)    |
| P(4)-Pt(2)-C(8)-C(7)       | -145(6)    |
| P(3)-Pt(2)-C(8)-C(7)       | 27(6)      |
| Pt(1)-Pt(2)-C(8)-C(7)      | -46(5)     |
| C(6B)-C(7B)-C(8B)-C(9B)    | -179.3(7)  |
| C(6A)-C(7A)-C(8A)-C(9A)    | -164.0(11) |
| C(7B)-C(8B)-C(9B)-C(10B)   | 60.6(10)   |
| C(7A)-C(8A)-C(9A)-C(10A)   | -178.3(9)  |
| C(8B)-C(9B)-C(10B)-C(11B)  | 59.9(10)   |
| C(8A)-C(9A)-C(10A)-C(11A)  | -74.8(13)  |
| C(1)-Pt(1)-C(11)-C(12)     | 146(3)     |
| P(2)-Pt(1)-C(11)-C(12)     | 78.2(5)    |
| P(1)-Pt(1)-C(11)-C(12)     | -100.3(5)  |
| Pt(2)-Pt(1)-C(11)-C(12)    | 139.5(4)   |
| C(1)-Pt(1)-C(11)-C(16)     | -32(3)     |
| P(2)-Pt(1)-C(11)-C(16)     | -99.7(4)   |
| P(1)-Pt(1)-C(11)-C(16)     | 81.9(4)    |
| Pt(2)-Pt(1)-C(11)-C(16)    | -38.4(7)   |
| C(9A)-C(10A)-C(11A)-O(12A) | -166.5(8)  |

|                             |           |
|-----------------------------|-----------|
| C(9B)-C(10B)-C(11B)-O(12B)  | 61.8(9)   |
| C(16)-C(11)-C(12)-F(12)     | 178.2(5)  |
| Pt(1)-C(11)-C(12)-F(12)     | 0.2(8)    |
| C(16)-C(11)-C(12)-C(13)     | 1.5(9)    |
| Pt(1)-C(11)-C(12)-C(13)     | -176.5(5) |
| C(10A)-C(11A)-O(12A)-C(13A) | -178.6(6) |
| C(10B)-C(11B)-O(12B)-C(13B) | 178.1(6)  |
| F(12)-C(12)-C(13)-F(13)     | -0.7(10)  |
| C(11)-C(12)-C(13)-F(13)     | 176.0(6)  |
| F(12)-C(12)-C(13)-C(14)     | -179.2(6) |
| C(11)-C(12)-C(13)-C(14)     | -2.4(11)  |
| C(11A)-O(12A)-C(13A)-C(14A) | 178.5(5)  |
| C(11B)-O(12B)-C(13B)-C(14B) | -178.9(5) |
| F(13)-C(13)-C(14)-F(14)     | 3.2(11)   |
| C(12)-C(13)-C(14)-F(14)     | -178.3(6) |
| F(13)-C(13)-C(14)-C(15)     | -177.6(6) |
| C(12)-C(13)-C(14)-C(15)     | 0.9(11)   |
| O(12B)-C(13B)-C(14B)-C(15B) | -59.2(6)  |
| O(12A)-C(13A)-C(14A)-C(15A) | -71.9(6)  |
| F(14)-C(14)-C(15)-F(15)     | -1.5(10)  |
| C(13)-C(14)-C(15)-F(15)     | 179.3(6)  |
| F(14)-C(14)-C(15)-C(16)     | -179.4(6) |
| C(13)-C(14)-C(15)-C(16)     | 1.3(10)   |
| C(13B)-C(14B)-C(15B)-C(16B) | -65.2(6)  |
| C(13A)-C(14A)-C(15A)-C(16A) | -79.4(6)  |
| F(15)-C(15)-C(16)-F(16)     | 1.9(8)    |
| C(14)-C(15)-C(16)-F(16)     | 179.8(5)  |
| F(15)-C(15)-C(16)-C(11)     | 179.7(5)  |
| C(14)-C(15)-C(16)-C(11)     | -2.4(9)   |
| C(12)-C(11)-C(16)-C(15)     | 1.0(8)    |
| Pt(1)-C(11)-C(16)-C(15)     | 179.0(4)  |
| C(12)-C(11)-C(16)-F(16)     | 178.7(5)  |
| Pt(1)-C(11)-C(16)-F(16)     | -3.2(7)   |
| C(14B)-C(15B)-C(16B)-P(3)   | 177.9(4)  |
| C(71)-P(3)-C(16B)-C(15B)    | -52.1(4)  |
| C(81)-P(3)-C(16B)-C(15B)    | 60.0(4)   |
| Pt(2)-P(3)-C(16B)-C(15B)    | -170.6(3) |
| C(14A)-C(15A)-C(16A)-P(4)   | 173.6(4)  |

|                           |           |
|---------------------------|-----------|
| C(91)-P(4)-C(16A)-C(15A)  | 81.6(5)   |
| C(101)-P(4)-C(16A)-C(15A) | -167.2(4) |
| Pt(2)-P(4)-C(16A)-C(15A)  | -47.3(5)  |
| C(31)-P(1)-C(21)-C(26)    | -154.6(5) |
| C(1A)-P(1)-C(21)-C(26)    | -43.0(6)  |
| Pt(1)-P(1)-C(21)-C(26)    | 77.5(6)   |
| C(31)-P(1)-C(21)-C(22)    | 38.1(6)   |
| C(1A)-P(1)-C(21)-C(22)    | 149.7(5)  |
| Pt(1)-P(1)-C(21)-C(22)    | -89.8(5)  |
| C(26)-C(21)-C(22)-C(23)   | -0.5(9)   |
| P(1)-C(21)-C(22)-C(23)    | 166.6(5)  |
| C(21)-C(22)-C(23)-C(24)   | -0.7(10)  |
| C(22)-C(23)-C(24)-C(25)   | 4.1(13)   |
| C(23)-C(24)-C(25)-C(26)   | -6.5(15)  |
| C(22)-C(21)-C(26)-C(25)   | -1.8(11)  |
| P(1)-C(21)-C(26)-C(25)    | -169.2(7) |
| C(24)-C(25)-C(26)-C(21)   | 5.2(14)   |
| C(21)-P(1)-C(31)-C(36)    | -148.0(5) |
| C(1A)-P(1)-C(31)-C(36)    | 99.1(5)   |
| Pt(1)-P(1)-C(31)-C(36)    | -21.2(6)  |
| C(21)-P(1)-C(31)-C(32)    | 39.7(6)   |
| C(1A)-P(1)-C(31)-C(32)    | -73.2(6)  |
| Pt(1)-P(1)-C(31)-C(32)    | 166.5(4)  |
| C(36)-C(31)-C(32)-C(33)   | -0.9(10)  |
| P(1)-C(31)-C(32)-C(33)    | 171.5(5)  |
| C(31)-C(32)-C(33)-C(34)   | 1.4(12)   |
| C(32)-C(33)-C(34)-C(35)   | -0.7(13)  |
| C(33)-C(34)-C(35)-C(36)   | -0.5(12)  |
| C(32)-C(31)-C(36)-C(35)   | -0.3(10)  |
| P(1)-C(31)-C(36)-C(35)    | -172.8(5) |
| C(34)-C(35)-C(36)-C(31)   | 1.1(11)   |
| C(51)-P(2)-C(41)-C(46)    | 64.7(5)   |
| C(1B)-P(2)-C(41)-C(46)    | -48.0(5)  |
| Pt(1)-P(2)-C(41)-C(46)    | -167.5(4) |
| C(51)-P(2)-C(41)-C(42)    | -117.2(4) |
| C(1B)-P(2)-C(41)-C(42)    | 130.0(4)  |
| Pt(1)-P(2)-C(41)-C(42)    | 10.6(5)   |
| C(46)-C(41)-C(42)-C(43)   | -0.1(9)   |

|                         |           |
|-------------------------|-----------|
| P(2)-C(41)-C(42)-C(43)  | -178.1(5) |
| C(41)-C(42)-C(43)-C(44) | 2.5(10)   |
| C(42)-C(43)-C(44)-C(45) | -2.7(12)  |
| C(43)-C(44)-C(45)-C(46) | 0.4(11)   |
| C(42)-C(41)-C(46)-C(45) | -2.2(8)   |
| P(2)-C(41)-C(46)-C(45)  | 175.9(4)  |
| C(44)-C(45)-C(46)-C(41) | 2.0(9)    |
| C(1B)-P(2)-C(51)-C(52)  | -46.6(5)  |
| C(41)-P(2)-C(51)-C(52)  | -155.4(4) |
| Pt(1)-P(2)-C(51)-C(52)  | 78.6(5)   |
| C(1B)-P(2)-C(51)-C(56)  | 137.5(5)  |
| C(41)-P(2)-C(51)-C(56)  | 28.6(5)   |
| Pt(1)-P(2)-C(51)-C(56)  | -97.4(5)  |
| C(56)-C(51)-C(52)-C(53) | 0.9(8)    |
| P(2)-C(51)-C(52)-C(53)  | -175.1(4) |
| C(51)-C(52)-C(53)-C(54) | -0.5(9)   |
| C(52)-C(53)-C(54)-C(55) | 0.6(10)   |
| C(53)-C(54)-C(55)-C(56) | -1.1(11)  |
| C(54)-C(55)-C(56)-C(51) | 1.5(12)   |
| C(52)-C(51)-C(56)-C(55) | -1.4(10)  |
| P(2)-C(51)-C(56)-C(55)  | 174.7(6)  |
| C(8)-Pt(2)-C(61)-C(66)  | -13(58)   |
| P(4)-Pt(2)-C(61)-C(66)  | 69.6(4)   |
| P(3)-Pt(2)-C(61)-C(66)  | -103.1(4) |
| Pt(1)-Pt(2)-C(61)-C(66) | -29.3(11) |
| C(8)-Pt(2)-C(61)-C(62)  | 169(100)  |
| P(4)-Pt(2)-C(61)-C(62)  | -108.6(4) |
| P(3)-Pt(2)-C(61)-C(62)  | 78.7(4)   |
| Pt(1)-Pt(2)-C(61)-C(62) | 152.5(6)  |
| C(66)-C(61)-C(62)-F(62) | -179.8(4) |
| Pt(2)-C(61)-C(62)-F(62) | -1.5(6)   |
| C(66)-C(61)-C(62)-C(63) | 1.2(8)    |
| Pt(2)-C(61)-C(62)-C(63) | 179.6(4)  |
| F(62)-C(62)-C(63)-F(63) | -0.9(8)   |
| C(61)-C(62)-C(63)-F(63) | 178.1(5)  |
| F(62)-C(62)-C(63)-C(64) | 179.0(5)  |
| C(61)-C(62)-C(63)-C(64) | -2.0(9)   |
| F(63)-C(63)-C(64)-F(64) | 0.6(9)    |

|                         |           |
|-------------------------|-----------|
| C(62)-C(63)-C(64)-F(64) | -179.3(5) |
| F(63)-C(63)-C(64)-C(65) | -179.6(6) |
| C(62)-C(63)-C(64)-C(65) | 0.5(9)    |
| F(64)-C(64)-C(65)-F(65) | -0.3(10)  |
| C(63)-C(64)-C(65)-F(65) | 179.9(6)  |
| F(64)-C(64)-C(65)-C(66) | -178.6(6) |
| C(63)-C(64)-C(65)-C(66) | 1.5(10)   |
| C(62)-C(61)-C(66)-C(65) | 1.1(8)    |
| Pt(2)-C(61)-C(66)-C(65) | -177.2(5) |
| C(62)-C(61)-C(66)-F(66) | 179.2(4)  |
| Pt(2)-C(61)-C(66)-F(66) | 0.9(7)    |
| F(65)-C(65)-C(66)-C(61) | 179.2(5)  |
| C(64)-C(65)-C(66)-C(61) | -2.5(10)  |
| F(65)-C(65)-C(66)-F(66) | 1.0(9)    |
| C(64)-C(65)-C(66)-F(66) | 179.3(5)  |
| C(81)-P(3)-C(71)-C(72)  | -28.9(5)  |
| C(16B)-P(3)-C(71)-C(72) | 83.7(5)   |
| Pt(2)-P(3)-C(71)-C(72)  | -153.5(4) |
| C(81)-P(3)-C(71)-C(76)  | 152.6(4)  |
| C(16B)-P(3)-C(71)-C(76) | -94.8(4)  |
| Pt(2)-P(3)-C(71)-C(76)  | 28.0(5)   |
| C(76)-C(71)-C(72)-C(73) | -2.2(8)   |
| P(3)-C(71)-C(72)-C(73)  | 179.3(4)  |
| C(71)-C(72)-C(73)-C(74) | 0.9(9)    |
| C(72)-C(73)-C(74)-C(75) | 1.3(9)    |
| C(73)-C(74)-C(75)-C(76) | -2.2(9)   |
| C(74)-C(75)-C(76)-C(71) | 0.8(9)    |
| C(72)-C(71)-C(76)-C(75) | 1.4(8)    |
| P(3)-C(71)-C(76)-C(75)  | 179.9(4)  |
| C(71)-P(3)-C(81)-C(86)  | -43.5(5)  |
| C(16B)-P(3)-C(81)-C(86) | -154.8(4) |
| Pt(2)-P(3)-C(81)-C(86)  | 76.4(4)   |
| C(71)-P(3)-C(81)-C(82)  | 143.1(4)  |
| C(16B)-P(3)-C(81)-C(82) | 31.8(5)   |
| Pt(2)-P(3)-C(81)-C(82)  | -97.0(4)  |
| C(86)-C(81)-C(82)-C(83) | -0.1(8)   |
| P(3)-C(81)-C(82)-C(83)  | 173.3(4)  |
| C(81)-C(82)-C(83)-C(84) | 0.7(9)    |

|                             |           |
|-----------------------------|-----------|
| C(82)-C(83)-C(84)-C(85)     | -0.6(10)  |
| C(83)-C(84)-C(85)-C(86)     | -0.2(9)   |
| C(82)-C(81)-C(86)-C(85)     | -0.6(8)   |
| P(3)-C(81)-C(86)-C(85)      | -174.2(4) |
| C(84)-C(85)-C(86)-C(81)     | 0.8(9)    |
| C(101)-P(4)-C(91)-C(96)     | -172.5(4) |
| C(16A)-P(4)-C(91)-C(96)     | -64.0(5)  |
| Pt(2)-P(4)-C(91)-C(96)      | 65.7(5)   |
| C(101)-P(4)-C(91)-C(92)     | 13.7(5)   |
| C(16A)-P(4)-C(91)-C(92)     | 122.2(4)  |
| Pt(2)-P(4)-C(91)-C(92)      | -108.1(4) |
| C(96)-C(91)-C(92)-C(93)     | -1.3(8)   |
| P(4)-C(91)-C(92)-C(93)      | 172.5(5)  |
| C(91)-C(92)-C(93)-C(94)     | 0.5(9)    |
| C(92)-C(93)-C(94)-C(95)     | 0.2(11)   |
| C(93)-C(94)-C(95)-C(96)     | -0.2(11)  |
| C(92)-C(91)-C(96)-C(95)     | 1.3(9)    |
| P(4)-C(91)-C(96)-C(95)      | -172.6(5) |
| C(94)-C(95)-C(96)-C(91)     | -0.6(11)  |
| C(91)-P(4)-C(101)-C(106)    | -102.1(5) |
| C(16A)-P(4)-C(101)-C(106)   | 144.6(5)  |
| Pt(2)-P(4)-C(101)-C(106)    | 21.6(5)   |
| C(91)-P(4)-C(101)-C(102)    | 77.5(5)   |
| C(16A)-P(4)-C(101)-C(102)   | -35.8(5)  |
| Pt(2)-P(4)-C(101)-C(102)    | -158.7(4) |
| C(106)-C(101)-C(102)-C(103) | -0.3(8)   |
| P(4)-C(101)-C(102)-C(103)   | -180.0(4) |
| C(101)-C(102)-C(103)-C(104) | 1.3(9)    |
| C(102)-C(103)-C(104)-C(105) | -1.5(11)  |
| C(103)-C(104)-C(105)-C(106) | 0.7(11)   |
| C(102)-C(101)-C(106)-C(105) | -0.4(9)   |
| P(4)-C(101)-C(106)-C(105)   | 179.3(5)  |
| C(104)-C(105)-C(106)-C(101) | 0.2(11)   |

---
